# Supplementary material for: The SlERF4-9-SlCDF1/3-SlAEC2/SlPIN5 module regulates tomato root morphogenesis
Source: Front Plant Sci. 2025 Mar 28;16:1546092. doi: 10.3389/fpls.2025.1546092 (PMC11985770; doi:10.3389/fpls.2025.1546092)
Supplement: Supplementary file 7 [file Table5.xlsx]

## Sheet: Sheet1
Table S5. 419 up-regulation DEGs in WT_vs_E31. WT, young roots of wild type tomato; E31, young roots of slerf4-9 mutant line #31
Gene ID	baseMean_WT	baseMean_E31	foldChange(E31/WT)	log2FoldChange	pval	padj	GO	KEGG	eggNOG	eggNOG_Category	Swissprot	NR	BP	CC	MF	Pathway	Description
Solyc08g150141.1	18.98	610.553	32.1683	5.00757	3.98798e-42	5.18019e-38	-	-	-	-	-	-	-	-	-	-	Unknown protein
Solyc09g066085.1	2.71828	195.692	71.991	6.16975	1.21702e-30	1.0539e-26	-	-	-	-	-	-	-	-	-	-	Unknown protein
Solyc10g008720.4	0.303217	88.8307	292.961	8.19456	1.72094e-20	8.94168e-17	-	-	-	-	-	-	-	-	-	-	GDSL esterase/lipase (AHRD V3.3 A0A2G3D516_CAPCH)
Solyc08g074895.1	5.22158	133.358	25.5398	4.67468	2.16061e-19	9.35509e-16	-	-	-	-	-	-	-	-	-	-	F-box/FBD/LRR-repeat protein isoform X2 (AHRD V3.3 XP_025888141.1)
Solyc01g103920.3	31.1461	282.586	9.07292	3.18157	1.97669e-17	6.41904e-14	GO:0009055;GO:0051536	K02639	virNOG19287;virNOG20113	C	sp|Q9ZTS2|FER_CAPAN Ferredoxin, chloroplastic OS=Capsicum annuum GN=AP1 PE=1 SV=1	gi|460369244|ref|XP_004230473.1| PREDICTED: ferredoxin-like [Solanum lycopersicum]	-	-	GO:0009055//electron transfer activity;GO:0051536//iron-sulfur cluster binding;	ko00195(Photosynthesis)	Ferredoxin (AHRD V3.3 K4B1W7_SOLLC)
Solyc01g098440.3	17.4799	163.906	9.37681	3.2291	6.18346e-14	1.78489e-10	GO:0004672;GO:0005524;GO:0006468	-	-	-	-	-	GO:0006468//protein phosphorylation;	-	GO:0004672//protein kinase activity;GO:0005524//ATP binding;	-	Receptor-like cytosolic serine/threonine-protein kinase RBK2 (AHRD V3.3 A0A2G2YZ52_CAPAN)
Solyc07g026710.3	0	44.7884	Inf	Inf	1.69698e-12	4.0078e-09	-	-	-	-	-	-	-	-	-	-	Unknown protein
Solyc07g052020.2	20.7763	148.101	7.12838	2.83357	4.53743e-11	9.06752e-08	GO:0005524	-	KOG1002	L	sp|P79051|RHP16_SCHPO ATP-dependent helicase rhp16 OS=Schizosaccharomyces pombe (strain 972 / ATCC 24843) GN=rhp16 PE=3 SV=2	gi|970040279|ref|XP_015081517.1| PREDICTED: ATP-dependent helicase rhp16-like [Solanum pennellii]	-	-	GO:0005524//ATP binding;	-	BnaAnng12340D protein (AHRD V3.3 A0A078IU57_BRANA)
Solyc08g007770.4	16.4216	116.72	7.10769	2.82938	7.35984e-10	1.36572e-06	-	-	-	-	-	-	-	-	-	-	PGRL1A transmembrane protein (AHRD V3.3 A0A0F7GZ28_9ROSI)
Solyc07g064380.4	28.5017	156.898	5.50484	2.4607	1.14776e-09	1.98785e-06	-	-	-	-	-	-	-	-	-	-	Aminotransferase-like, plant mobile domain-containing protein (AHRD V3.3 A0A124SHR6_CYNCS)
Solyc02g014150.4	50.6058	238.203	4.70702	2.23481	1.26184e-09	2.04883e-06	-	-	-	-	-	-	-	-	-	-	Photosystem II stability/assembly factor HCF136 (AHRD V3.3 A0A1Y1IDD9_KLENI)
Solyc05g015550.2	0.303217	33.8163	111.525	6.80123	6.12889e-09	8.84568e-06	-	K08065	COG2036	B	sp|Q84W66|NFYB6_ARATH Nuclear transcription factor Y subunit B-6 OS=Arabidopsis thaliana GN=NFYB6 PE=1 SV=2	gi|723700543|ref|XP_010321196.1| PREDICTED: nuclear transcription factor Y subunit B-6-like [Solanum lycopersicum]	-	-	-	-	Nuclear transcription factor Y subunit B-9 (AHRD V3.3 A0A2G3AZ68_CAPCH)
Solyc07g064370.1	23.9499	131.862	5.50576	2.46094	6.55612e-09	8.96429e-06	-	-	virNOG15785;virNOG06009	S	-	gi|723718362|ref|XP_010324319.1| PREDICTED: uncharacterized protein LOC101267913 [Solanum lycopersicum]	-	-	-	-	Aminotransferase-like, plant mobile domain-containing protein (AHRD V3.3 A0A124SHR6_CYNCS)
Solyc10g086580.2	84.6401	323.653	3.82387	1.93503	9.23812e-09	1.19999e-05	GO:0005524	-	virNOG01517	O	sp|O49074|RCA_SOLPN Ribulose bisphosphate carboxylase/oxygenase activase, chloroplastic OS=Solanum pennellii PE=2 SV=1	gi|970057853|ref|XP_015055597.1| PREDICTED: ribulose bisphosphate carboxylase/oxygenase activase, chloroplastic [Solanum pennellii]	-	-	GO:0005524//ATP binding;	-	Ribulose bisphosphate carboxylase/oxygenase activase, chloroplastic (AHRD V3.3 RCA_SOLPN)
Solyc07g052010.3	18.4773	112.384	6.08228	2.60461	1.3875e-08	1.63844e-05	GO:0005524	-	-	-	-	-	-	-	GO:0005524//ATP binding;	-	SNF2 domain-containing protein / helicase domain-containing protein / zinc finger protein-like protein (AHRD V3.3 A0A1I9LTA6_ARATH)
Solyc02g069450.3	11.9125	90.3739	7.58645	2.92343	1.52422e-08	1.72164e-05	GO:0009522;GO:0009538;GO:0015979	K02694	virNOG08484	G	sp|P46486|PSAF_FLATR Photosystem I reaction center subunit III, chloroplastic OS=Flaveria trinervia GN=PSAF PE=2 SV=1	gi|970009539|ref|XP_015065654.1| PREDICTED: photosystem I reaction center subunit III, chloroplastic-like [Solanum pennellii]	GO:0015979//photosynthesis;	GO:0009522//photosystem I;GO:0009538//photosystem I reaction center;	-	ko00195(Photosynthesis)	Photosystem I reaction center subunit III, chloroplastic (AHRD V3.3 A0A1U8FJA0_CAPAN)
Solyc02g080540.1	72.8893	305.554	4.19202	2.06765	2.05874e-08	2.2285e-05	GO:0015986;GO:0045261;GO:0046933	K02115	virNOG10272	C	sp|P29790|ATPG_TOBAC ATP synthase gamma chain, chloroplastic OS=Nicotiana tabacum GN=ATPC PE=1 SV=1	gi|970010004|ref|XP_015065901.1| PREDICTED: ATP synthase gamma chain, chloroplastic [Solanum pennellii]	GO:0015986//ATP synthesis coupled proton transport;	GO:0045261//proton-transporting ATP synthase complex, catalytic core F(1);	GO:0046933//proton-transporting ATP synthase activity, rotational mechanism;	ko00195(Photosynthesis);ko00190(Oxidative phosphorylation)	ATP synthase gamma chain, chloroplastic (AHRD V3.3 A0A2G3D743_CAPCH)
Solyc06g053510.3	334.874	1700.75	5.07878	2.34448	5.24631e-08	5.24207e-05	-	K05353	virNOG24227;virNOG07546;COG0421	E	sp|Q42963|PMT1_TOBAC Putrescine N-methyltransferase 1 OS=Nicotiana tabacum GN=PMT1 PE=2 SV=1	gi|970034655|ref|XP_015078654.1| PREDICTED: putrescine N-methyltransferase 3-like [Solanum pennellii]	-	-	-	ko00960(Tropane, piperidine and pyridine alkaloid biosynthesis)	putrescine N-methyltransferase,Pfam:PF01564
Solyc06g082940.3	82.1404	295.492	3.5974	1.84696	5.80513e-08	5.58561e-05	GO:0009522;GO:0009538;GO:0015979	K02699	virNOG03549	G	sp|Q9SUI4|PSAL_ARATH Photosystem I reaction center subunit XI, chloroplastic OS=Arabidopsis thaliana GN=PSAL PE=1 SV=2	gi|460393734|ref|XP_004242464.1| PREDICTED: photosystem I reaction center subunit XI, chloroplastic [Solanum lycopersicum]	GO:0015979//photosynthesis;	GO:0009522//photosystem I;GO:0009538//photosystem I reaction center;	-	ko00195(Photosynthesis)	Photosystem I reaction center subunit XI protein (AHRD V3.3 A0A2U1MVK5_ARTAN)
Solyc11g072790.2	0.303217	29.7139	97.9954	6.61464	6.28878e-08	5.83487e-05	GO:0003677	-	virNOG19805	K	sp|Q9SIB4|WOX3_ARATH WUSCHEL-related homeobox 3 OS=Arabidopsis thaliana GN=WOX3 PE=1 SV=1	gi|460411785|ref|XP_004251286.1| PREDICTED: WUSCHEL-related homeobox 3-like [Solanum lycopersicum]	-	-	GO:0003677//DNA binding;	-	WOX3b (AHRD V3.3 A0A1S3ZKN4_TOBAC)
Solyc10g087030.1	18.8551	108.366	5.74727	2.52288	7.37723e-08	6.60872e-05	GO:0005506;GO:0016705;GO:0020037;GO:0055114	-	-	-	-	-	GO:0055114//obsolete oxidation-reduction process;	-	GO:0005506//iron ion binding;GO:0016705//oxidoreductase activity, acting on paired donors, with incorporation or reduction of molecular oxygen;GO:0020037//heme binding;	-	Cytochrome (AHRD V3.3 A0A1U8F0H8_CAPAN)
Solyc05g010518.1	4.62582	52.1579	11.2754	3.4951	1.26842e-07	0.000109841	-	-	-	-	-	-	-	-	-	-	Anthranilate phosphoribosyltransferase, chloroplastic (AHRD V3.3 A0A2G3DFN4_CAPCH)
Solyc04g055170.3	2686.5	7675.99	2.85725	1.51463	1.35824e-07	0.000113825	GO:0005509;GO:0005544	K17098	virNOG08442	U	sp|Q9XEE2|ANXD2_ARATH Annexin D2 OS=Arabidopsis thaliana GN=ANN2 PE=1 SV=1	gi|802083925|ref|NP_001234101.2| annexin p35 [Solanum lycopersicum] gi|970026031|ref|XP_015074320.1| PREDICTED: annexin D2-like [Solanum pennellii]	-	-	GO:0005509//calcium ion binding;GO:0005544//calcium-dependent phospholipid binding;	-	annexin p35
Solyc02g079930.3	215.672	613.835	2.84615	1.50901	3.18156e-07	0.000258293	-	-	virNOG13367	S	sp|Q8GWL1|HSA32_ARATH Protein HEAT-STRESS-ASSOCIATED 32 OS=Arabidopsis thaliana GN=HSA32 PE=2 SV=1	gi|350534450|ref|NP_001234653.1| phosphosulfolactate synthase-related protein [Solanum lycopersicum] gi|54639895|gb|AAV36519.1| phosphosulfolactate synthase-related protein [Solanum lycopersicum] gi|54639897|gb|AAV36520.1| phosphosulfolactate synthase-related protein [Solanum lycopersicum]	-	-	-	-	phosphosulfolactate synthase
Solyc11g007990.2	124.697	383.892	3.07861	1.62228	3.36634e-07	0.000265013	GO:0016491;GO:0055114	-	virNOG05480;COG0039	C	sp|O48902|MDHP_MEDSA Malate dehydrogenase [NADP], chloroplastic OS=Medicago sativa GN=MDH1 PE=2 SV=1	gi|350537825|ref|NP_001234056.1| malate dehydrogenase [Solanum lycopersicum] gi|56562183|emb|CAH60894.1| malate dehydrogenase [Solanum lycopersicum]	GO:0055114//obsolete oxidation-reduction process;	-	GO:0016491//oxidoreductase activity;	-	chloroplast malate dehydrogenase (mdh)
Solyc02g090630.4	578.859	1600.12	2.76426	1.46689	4.59278e-07	0.000350929	GO:0006629	-	-	-	-	-	GO:0006629//lipid metabolic process;	-	-	-	Patatin (AHRD V3.3 A0A2G3D8S9_CAPCH)
Solyc10g018300.3	100.903	431.226	4.27366	2.09547	4.85213e-07	0.000360153	-	K00615	-	-	-	-	-	-	-	ko00710(Carbon fixation in photosynthetic organisms);ko00030(Pentose phosphate pathway)	Transketolase (AHRD V3.3 A0A200R9X0_9MAGN)
Solyc05g052570.3	1708.52	4313.82	2.52488	1.33621	6.36004e-07	0.000458965	-	-	KOG1595;virNOG01784	R	sp|Q9LUZ4|C3H66_ARATH Zinc finger CCCH domain-containing protein 66 OS=Arabidopsis thaliana GN=At5g58620 PE=2 SV=1	gi|460388576|ref|XP_004239943.1| PREDICTED: zinc finger CCCH domain-containing protein 29-like [Solanum lycopersicum]	-	-	-	-	Zinc finger transcription factor 39
Solyc02g089630.3	128.83	374.108	2.90387	1.53798	1.23687e-06	0.000823917	-	K00318	virNOG03559	E	sp|Q6NKX1|PROD2_ARATH Proline dehydrogenase 2, mitochondrial OS=Arabidopsis thaliana GN=POX2 PE=2 SV=1	gi|460372589|ref|XP_004232111.1| PREDICTED: proline dehydrogenase 2, mitochondrial-like [Solanum lycopersicum]	-	-	-	ko00330(Arginine and proline metabolism)	Proline dehydrogenase (AHRD V3.3 A0A2G2XIU2_CAPBA)
Solyc07g026705.1	0.909651	38.4846	42.307	5.40282	1.31381e-06	0.000853285	-	-	-	-	-	-	-	-	-	-	purine permease 1-like (AHRD V3.3 A0A1S4AAJ7_TOBAC)
Solyc06g060340.3	9.99549	66.4522	6.64822	2.73297	1.52122e-06	0.000963899	-	K03542	virNOG10593	R	sp|P54773|PSBS_SOLLC Photosystem II 22 kDa protein, chloroplastic OS=Solanum lycopersicum GN=PSBS PE=3 SV=1	gi|970036410|ref|XP_015079539.1| PREDICTED: photosystem II 22 kDa protein, chloroplastic [Solanum pennellii]	-	-	-	ko00195(Photosynthesis)	Photosystem II 22 kDa protein, chloroplastic (AHRD V3.3 A0A1U8GV91_CAPAN)
Solyc04g007470.3	6.14191	51.7174	8.42042	3.07389	1.62711e-06	0.00100645	-	-	virNOG15784	R	sp|Q9C9F4|COLX_ARATH Putative zinc finger protein At1g68190 OS=Arabidopsis thaliana GN=At1g68190 PE=2 SV=1	gi|460382506|ref|XP_004236980.1| PREDICTED: putative zinc finger protein At1g68190 isoform X2 [Solanum lycopersicum]	-	-	-	-	Drought responsive Zinc finger protein
Solyc03g005960.3	126.271	360.524	2.85516	1.51357	2.44761e-06	0.00141303	GO:0004672;GO:0005524;GO:0006468	-	virNOG10541;COG4886;COG0515	ST	sp|C0LGG9|Y5344_ARATH Probable LRR receptor-like serine/threonine-protein kinase At1g53440 OS=Arabidopsis thaliana GN=At1g53440 PE=2 SV=2	gi|723678720|ref|XP_010317417.1| PREDICTED: probable LRR receptor-like serine/threonine-protein kinase At1g53420 isoform X1 [Solanum lycopersicum]	GO:0006468//protein phosphorylation;	-	GO:0004672//protein kinase activity;GO:0005524//ATP binding;	-	protein kinase LESK1
Solyc07g045180.4	168.145	459.622	2.73349	1.45074	2.88066e-06	0.00162688	GO:0005515	-	-	-	-	-	-	-	GO:0005515//protein binding;	-	Zinc finger protein CONSTANS-LIKE 9 (AHRD V3.3 A0A2G2WC44_CAPBA)
Solyc03g118130.3	77.8995	233.969	3.00348	1.58663	4.71872e-06	0.00255391	GO:0005506	-	virNOG19220	S	sp|P24297|RUBR_PYRFU Rubredoxin OS=Pyrococcus furiosus (strain ATCC 43587 / DSM 3638 / JCM 8422 / Vc1) GN=rub PE=1 SV=2	gi|460380221|ref|XP_004235856.1| PREDICTED: uncharacterized protein LOC101245339 [Solanum lycopersicum]	-	-	GO:0005506//iron ion binding;	-	Rubredoxin (AHRD V3.3 A0A2K3LH61_TRIPR)
Solyc08g074910.3	3.55448	37.2032	10.4666	3.38772	5.1113e-06	0.00270993	-	-	virNOG40814;virNOG33002	R	-	gi|971543675|ref|XP_015162486.1| PREDICTED: F-box/FBD/LRR-repeat protein At1g13570-like [Solanum tuberosum]	-	-	-	-	F-box/FBD/LRR-repeat protein isoform X2 (AHRD V3.3 XP_025888141.1)
Solyc05g055290.3	179.221	530.006	2.95728	1.56427	5.79503e-06	0.00301098	-	-	euNOG29203;virNOG12164;NOG53798;NOG208934;NOG22326	R	-	gi|460388133|ref|XP_004239724.1| PREDICTED: uncharacterized protein LOC101244873 [Solanum lycopersicum]	-	-	-	-	Alpha/beta-Hydrolases superfamily protein (AHRD V3.3 A0A2U1MAY4_ARTAN)
Solyc10g005120.2	84.5959	247.698	2.92801	1.54992	6.45627e-06	0.00328877	GO:0016491;GO:0055114	-	virNOG10742	Q	sp|Q9ZSA7|DLO2_ARATH Protein DMR6-LIKE OXYGENASE 2 OS=Arabidopsis thaliana GN=DLO2 PE=2 SV=1	gi|460405898|ref|XP_004248411.1| PREDICTED: probable 2-oxoglutarate/Fe(II)-dependent dioxygenase [Solanum lycopersicum]	GO:0055114//obsolete oxidation-reduction process;	-	GO:0016491//oxidoreductase activity;	-	2-oxoglutarate (2OG) and Fe(II)-dependent oxygenase superfamily protein (AHRD V3.3 F4JLS2_ARATH)
Solyc06g061070.3	235.72	602.58	2.55634	1.35408	7.35448e-06	0.00360494	-	K02437	virNOG11449	E	sp|Q39732|GCSH_FLAAN Glycine cleavage system H protein, mitochondrial OS=Flaveria anomala GN=GDCSH PE=2 SV=1	gi|460392743|ref|XP_004241973.1| PREDICTED: glycine cleavage system H protein, mitochondrial [Solanum lycopersicum] gi|970036518|ref|XP_015079597.1| PREDICTED: glycine cleavage system H protein, mitochondrial-like [Solanum pennellii]	-	-	-	ko00630(Glyoxylate and dicarboxylate metabolism);ko00260(Glycine, serine and threonine metabolism)	Glycine cleavage system H protein (AHRD V3.3 A0A1U8GUW6_CAPAN)
Solyc07g042500.4	587.118	1417.3	2.414	1.27142	7.84119e-06	0.00377234	GO:0016020	K07052	-	-	-	-	-	GO:0016020//membrane;	-	-	alpha/beta-Hydrolases superfamily protein (AHRD V3.3 AT2G03140.9)
Solyc04g009030.3	29.1817	219.283	7.51441	2.90966	9.10498e-06	0.0043007	GO:0016620;GO:0055114	K05298	virNOG04721	G	sp|P09043|G3PA_TOBAC Glyceraldehyde-3-phosphate dehydrogenase A, chloroplastic (Fragment) OS=Nicotiana tabacum GN=GAPA PE=2 SV=1	gi|460382243|ref|XP_004236849.1| PREDICTED: glyceraldehyde-3-phosphate dehydrogenase A, chloroplastic [Solanum lycopersicum]	GO:0055114//obsolete oxidation-reduction process;	-	GO:0016620//oxidoreductase activity, acting on the aldehyde or oxo group of donors, NAD or NADP as acceptor;	ko00710(Carbon fixation in photosynthetic organisms)	Glyceraldehyde-3-phosphate dehydrogenase (AHRD V3.3 A0A0A8IBT8_NICBE)
Solyc05g052550.1	519.885	1224.29	2.35492	1.23568	9.2761e-06	0.00430328	-	-	KOG1595;virNOG01784	R	sp|Q9XEE6|C3H29_ARATH Zinc finger CCCH domain-containing protein 29 OS=Arabidopsis thaliana GN=At2g40140 PE=1 SV=1	gi|460388576|ref|XP_004239943.1| PREDICTED: zinc finger CCCH domain-containing protein 29-like [Solanum lycopersicum]	-	-	-	-	Zinc finger CCCH domain-containing protein 47 (AHRD V3.3 A0A1U8GQ71_CAPAN)
Solyc01g111630.3	165.235	431.385	2.61074	1.38446	1.04826e-05	0.00473715	GO:0016616;GO:0051287;GO:0055114	K15893	virNOG00685	E	sp|Q9C9W5|HPR1_ARATH Glycerate dehydrogenase HPR, peroxisomal OS=Arabidopsis thaliana GN=HPR PE=1 SV=1	gi|460370413|ref|XP_004231047.1| PREDICTED: glycerate dehydrogenase [Solanum lycopersicum]	GO:0055114//obsolete oxidation-reduction process;	-	GO:0016616//oxidoreductase activity, acting on the CH-OH group of donors, NAD or NADP as acceptor;GO:0051287//NAD binding;	ko00630(Glyoxylate and dicarboxylate metabolism);ko00260(Glycine, serine and threonine metabolism)	glycerate dehydrogenase (AHRD V3.3 A0A2I4EWU8_9ROSI)
Solyc07g007755.1	410.851	1045.33	2.54431	1.34727	1.0576e-05	0.00473715	-	-	-	-	-	-	-	-	-	-	Defensin protein (AHRD V3.3 B1N681_SOLPI)
Solyc03g112760.3	100.528	323.433	3.21734	1.68587	1.17085e-05	0.00506959	-	-	virNOG06367	T	-	gi|460380963|ref|XP_004236222.1| PREDICTED: uncharacterized protein LOC101255285 isoform X1 [Solanum lycopersicum]	-	-	-	-	transmembrane protein (AHRD V3.3 AT3G48200.1)
Solyc11g012210.1	356.881	1535.07	4.30134	2.10479	1.43047e-05	0.00603805	-	-	virNOG12669	S	sp|Q9SV07|ASAT1_ARATH Acyl-CoA--sterol O-acyltransferase 1 OS=Arabidopsis thaliana GN=ASAT1 PE=1 SV=1	gi|723742144|ref|XP_010312741.1| PREDICTED: acyl-CoA--sterol O-acyltransferase 1-like [Solanum lycopersicum]	-	-	-	-	MBOAT (Membrane bound O-acyl transferase) family protein (AHRD V3.3 A0A2U1LYZ9_ARTAN)
Solyc02g085870.3	170.672	428.805	2.51244	1.32909	1.57931e-05	0.0064828	GO:0006633;GO:0016020;GO:0016747	K15397	virNOG00803	M	sp|Q9XF43|KCS6_ARATH 3-ketoacyl-CoA synthase 6 OS=Arabidopsis thaliana GN=CUT1 PE=1 SV=1	gi|961349578|ref|NP_001304751.1| 3-ketoacyl-CoA synthase 6 [Solanum lycopersicum]	GO:0006633//fatty acid biosynthetic process;	GO:0016020//membrane;	GO:0016747//acyltransferase activity, transferring groups other than amino-acyl groups;	ko04626(Plant-pathogen interaction);ko00062(Fatty acid elongation)	beta-ketoacyl-coenzyme A synthase
Solyc06g068230.4	294.317	849.333	2.88578	1.52896	1.59706e-05	0.0064828	-	K03255	-	-	-	-	-	-	-	-	Tetratricopeptide repeat (TPR)-like superfamily protein (AHRD V3.3 A0A2U1MYN5_ARTAN)
Solyc04g014520.1	218.567	557.924	2.55265	1.35199	1.69331e-05	0.00676779	-	-	NOG209058;virNOG02717	S	sp|Q3T130|TM45B_BOVIN Transmembrane protein 45B OS=Bos taurus GN=TMEM45B PE=2 SV=1	gi|460382820|ref|XP_004237134.1| PREDICTED: transmembrane protein 45B-like [Solanum lycopersicum]	-	-	-	-	transmembrane protein 45B-like (AHRD V3.3 A0A2I4DQK0_9ROSI)
Solyc12g005630.2	29.5127	125.055	4.23731	2.08315	2.20036e-05	0.00853183	GO:0016491;GO:0051537;GO:0055114	K02636	virNOG05349	C	sp|Q69GY7|UCRIA_SOLTU Cytochrome b6-f complex iron-sulfur subunit, chloroplastic OS=Solanum tuberosum GN=petC PE=2 SV=1	gi|964749655|ref|NP_001304899.1| cytochrome b6-f complex iron-sulfur subunit, chloroplastic [Solanum lycopersicum]	GO:0055114//obsolete oxidation-reduction process;	-	GO:0016491//oxidoreductase activity;GO:0051537//2 iron, 2 sulfur cluster binding;	ko00195(Photosynthesis)	Cytochrome b6-f complex iron-sulfur subunit (AHRD V3.3 A0A1U8G0H9_CAPAN)
Solyc08g067260.4	830.896	1838.56	2.21275	1.14584	2.34936e-05	0.00897558	GO:0006633;GO:0016020;GO:0016747	K15397	-	-	-	-	GO:0006633//fatty acid biosynthetic process;	GO:0016020//membrane;	GO:0016747//acyltransferase activity, transferring groups other than amino-acyl groups;	ko04626(Plant-pathogen interaction);ko00062(Fatty acid elongation)	3-ketoacyl-CoA synthase (AHRD V3.3 A0A1U8DS82_CAPAN)
Solyc04g007530.3	238.519	577.765	2.4223	1.27638	2.40485e-05	0.00905442	GO:0006855;GO:0015238;GO:0015297;GO:0016020;GO:0055085	K03327	virNOG03991	S	sp|Q9C994|DTX14_ARATH Protein DETOXIFICATION 14 OS=Arabidopsis thaliana GN=DTX14 PE=3 SV=1	gi|460382512|ref|XP_004236983.1| PREDICTED: MATE efflux family protein 5 [Solanum lycopersicum]	GO:0006855//xenobiotic transmembrane transport;GO:0055085//transmembrane transport;	GO:0016020//membrane;	GO:0015297//antiporter activity;	-	Protein DETOXIFICATION (AHRD V3.3 A0A328D6Y5_9ASTE)
Solyc10g076700.2	12.3318	62.1382	5.03885	2.33309	3.21569e-05	0.0117663	-	-	virNOG00015	R	sp|Q9SR92|STR10_ARATH Rhodanese-like domain-containing protein 10 OS=Arabidopsis thaliana GN=STR10 PE=2 SV=1	gi|460407269|ref|XP_004249076.1| PREDICTED: rhodanese-like domain-containing protein 10 [Solanum lycopersicum]	-	-	-	-	Rhodanese-like domain-containing protein 10 (AHRD V3.3 A0A1U8EI03_CAPAN)
Solyc06g082950.4	46.0084	142.575	3.09889	1.63175	3.56291e-05	0.0124879	GO:0009522;GO:0009538;GO:0015979	K02699	-	-	-	-	GO:0015979//photosynthesis;	GO:0009522//photosystem I;GO:0009538//photosystem I reaction center;	-	ko00195(Photosynthesis)	Photosystem I reaction center subunit XI protein (AHRD V3.3 A0A2U1MVK5_ARTAN)
Solyc04g077755.1	38.7157	120.677	3.117	1.64016	4.32026e-05	0.0145606	GO:0016651;GO:0022900	-	-	-	-	-	GO:0022900//electron transport chain;	-	GO:0016651//oxidoreductase activity, acting on NAD(P)H;	-	NADH dehydrogenase [ubiquinone] iron-sulfur protein 4, mitochondrial-like (AHRD V3.3 A0A2I4GIJ5_9ROSI)
Solyc09g005500.3	3718.19	8891.66	2.39139	1.25785	4.37172e-05	0.0145606	GO:0006952	-	virNOG23041	S	sp|Q9SSK9|MLP28_ARATH MLP-like protein 28 OS=Arabidopsis thaliana GN=MLP28 PE=1 SV=1	gi|460402514|ref|XP_004246757.1| PREDICTED: MLP-like protein 28 [Solanum lycopersicum] gi|970051521|ref|XP_015087356.1| PREDICTED: MLP-like protein 28 [Solanum pennellii]	GO:0006952//defense response;	-	-	-	Kirola (AHRD V3.3 A0A2U1MSQ9_ARTAN)
Solyc11g061960.2	57.0214	171.783	3.01261	1.59101	4.85078e-05	0.0159517	GO:0004672;GO:0005524;GO:0006468	K08857	virNOG06997	T	sp|Q9LT35|NEK6_ARATH Serine/threonine-protein kinase Nek6 OS=Arabidopsis thaliana GN=NEK6 PE=3 SV=1	gi|723744513|ref|XP_010313207.1| PREDICTED: serine/threonine-protein kinase Nek6 isoform X1 [Solanum lycopersicum]	GO:0006468//protein phosphorylation;	-	GO:0004672//protein kinase activity;GO:0005524//ATP binding;	-	Protein kinase-like domain-containing protein (AHRD V3.3 A0A2U1MAQ3_ARTAN)
Solyc04g056580.3	31.4617	107.424	3.41445	1.77165	4.98213e-05	0.0161788	-	-	virNOG00198	S	-	gi|460383319|ref|XP_004237375.1| PREDICTED: uncharacterized protein LOC101253079 [Solanum lycopersicum]	-	-	-	-	Transmembrane protein, putative (DUF2358) (AHRD V3.3 Q8L604_ARATH)
Solyc12g087870.2	219.173	515.795	2.35337	1.23473	5.58918e-05	0.0177075	-	-	virNOG10208	G	sp|Q9FZ95|PUP3_ARATH Purine permease 3 OS=Arabidopsis thaliana GN=PUP3 PE=2 SV=1	gi|460414725|ref|XP_004252714.1| PREDICTED: purine permease 3-like [Solanum lycopersicum]	-	-	-	-	purine permease 3-like (AHRD V3.3 A0A1U8F0C1_CAPAN),Pfam:PF16913
Solyc02g093590.3	54.6654	159.528	2.91825	1.54511	5.85801e-05	0.0183356	GO:0005515	-	virNOG22842	K	sp|Q9C9A9|COL7_ARATH Zinc finger protein CONSTANS-LIKE 7 OS=Arabidopsis thaliana GN=COL7 PE=2 SV=1	gi|460372010|ref|XP_004231827.1| PREDICTED: zinc finger protein CONSTANS-LIKE 16 [Solanum lycopersicum]	-	-	GO:0005515//protein binding;	-	zinc finger protein CONSTANS-LIKE 16-like (AHRD V3.3 A0A2I4E4H9_9ROSI)
Solyc07g008210.4	10.1572	54.2131	5.33742	2.41614	6.11865e-05	0.0189234	-	-	-	-	-	-	-	-	-	-	Tetratricopeptide repeat (TPR)-like superfamily protein (AHRD V3.3 F4K464_ARATH)
Solyc07g006290.3	51.2526	151.528	2.9565	1.56389	7.04068e-05	0.0213175	GO:0016020;GO:0016021	-	-	-	-	-	-	GO:0016020//membrane;GO:0016021//integral component of membrane;	-	-	WAT1-related protein (AHRD V3.3 K4CBA0_SOLLC)
Solyc10g076940.3	317.803	1195.17	3.76073	1.91101	7.05686e-05	0.0213175	GO:0016021;GO:0055085	-	-	-	-	-	GO:0055085//transmembrane transport;	GO:0016021//integral component of membrane;	-	-	Protein ZINC INDUCED FACILITATOR 1 (AHRD V3.3 A0A2G2VW12_CAPBA)
Solyc04g080650.4	70.6099	211.281	2.99223	1.58122	7.24425e-05	0.0214017	GO:0005506;GO:0016705;GO:0020037;GO:0055114	-	-	-	-	-	GO:0055114//obsolete oxidation-reduction process;	-	GO:0005506//iron ion binding;GO:0016705//oxidoreductase activity, acting on paired donors, with incorporation or reduction of molecular oxygen;GO:0020037//heme binding;	-	Cytochrome P450 (AHRD V3.3 A0A200QE46_9MAGN)
Solyc10g052490.2	139.937	342.754	2.44935	1.2924	7.24951e-05	0.0214017	-	K23050	virNOG12758;euNOG02074	R	sp|P52578|IFRH_SOLTU Isoflavone reductase homolog OS=Solanum tuberosum PE=2 SV=1	gi|460406525|ref|XP_004248713.1| PREDICTED: isoflavone reductase homolog [Solanum lycopersicum]	-	-	-	-	Isoflavone reductase homolog (AHRD V3.3 IFRH_SOLTU)
Solyc12g098240.1	31.4298	103.888	3.3054	1.72482	9.40244e-05	0.0274456	-	-	-	-	-	gi|971554600|ref|XP_015165220.1| PREDICTED: acanthoscurrin-1-like [Solanum tuberosum]	-	-	-	-	acanthoscurrin-1-like (AHRD V3.3 XP_010314853.1)
Solyc08g006930.3	10.108	50.47	4.99306	2.31993	0.000105235	0.0303767	GO:0009522;GO:0015979;GO:0016020	K02698	virNOG19967	R	sp|Q9SUI5|PSAK_ARATH Photosystem I reaction center subunit psaK, chloroplastic OS=Arabidopsis thaliana GN=PSAK PE=2 SV=2	gi|970047970|ref|XP_015085527.1| PREDICTED: photosystem I reaction center subunit psaK, chloroplastic [Solanum pennellii]	GO:0015979//photosynthesis;	GO:0009522//photosystem I;GO:0016020//membrane;	-	ko00195(Photosynthesis)	photosystem I reaction center subunit psaK, chloroplastic (AHRD V3.3 A0A2G3AN63_CAPAN)
Solyc03g096850.4	47.2172	137.802	2.91847	1.54521	0.000120355	0.0335489	-	-	-	-	-	-	-	-	-	-	Rubredoxin family protein (AHRD V3.3 Q9FFJ2_ARATH)
Solyc05g012600.3	12.8985	58.6748	4.54895	2.18553	0.000123381	0.0335489	-	-	virNOG19572	S	-	gi|460386784|ref|XP_004239076.1| PREDICTED: uncharacterized protein LOC101250301 [Solanum lycopersicum]	-	-	-	-	hypothetical protein (AHRD V3.3 AT2G03420.1)
Solyc04g007750.4	3003.69	6959.49	2.31698	1.21225	0.000123807	0.0335489	GO:0006952	-	-	-	-	-	GO:0006952//defense response;	-	-	-	Sn-1 protein (AHRD V3.3 Q42393_CAPAN)
Solyc01g096240.4	250.467	584.723	2.33453	1.22313	0.000123973	0.0335489	-	-	-	-	-	-	-	-	-	-	plant/protein (AHRD V3.3 AT3G61870.1)
Solyc08g078030.4	425.95	887.625	2.08387	1.05927	0.000128221	0.0340217	GO:0016747	-	-	-	-	-	-	-	GO:0016747//acyltransferase activity, transferring groups other than amino-acyl groups;	-	Transferase domain-containing protein (AHRD V3.3 A0A1Q3BID0_CEPFO)
Solyc02g085830.4	168.945	387.829	2.2956	1.19887	0.000129945	0.0340217	GO:0015031	-	-	-	-	-	GO:0015031//protein transport;	-	-	-	Regulator of Vps4 activity in the MVB pathway protein (AHRD V3.3 Q9FX63_ARATH)
Solyc10g018905.1	2.4731	25.7188	10.3994	3.37843	0.000130958	0.0340217	-	-	-	-	-	-	-	-	-	-	Unknown protein
Solyc06g074030.1	423.647	886.355	2.0922	1.06502	0.000134558	0.0346108	-	K12581	COG5228;virNOG39061;virNOG39068	K	sp|Q9LXM2|CAF1I_ARATH Probable CCR4-associated factor 1 homolog 9 OS=Arabidopsis thaliana GN=CAF1-9 PE=2 SV=1	gi|460391467|ref|XP_004241342.1| PREDICTED: probable CCR4-associated factor 1 homolog 9 [Solanum lycopersicum]	-	-	-	ko03018(RNA degradation)	Polynucleotidyl transferase, ribonuclease H-like superfamily protein (AHRD V3.3 A0A2U1M9A7_ARTAN)
Solyc05g009570.3	6.81942	41.6844	6.11259	2.61178	0.000136476	0.03476	GO:0003735;GO:0005840;GO:0006412	K19032	virNOG21843	J	sp|Q9SX22|RRP31_ARATH 30S ribosomal protein 3-1, chloroplastic OS=Arabidopsis thaliana GN=At1g68590 PE=2 SV=1	gi|460386514|ref|XP_004238943.1| PREDICTED: 30S ribosomal protein 3, chloroplastic-like [Solanum lycopersicum]	GO:0006412//translation;	GO:0005840//ribosome;	GO:0003735//structural constituent of ribosome;	-	30S ribosomal protein 3, chloroplastic (AHRD V3.3 A0A2G2VK36_CAPBA)
Solyc01g011510.4	314.854	745.394	2.36743	1.24332	0.000140968	0.0352135	GO:0016491;GO:0055114	K00128	-	-	-	-	GO:0055114//obsolete oxidation-reduction process;	-	GO:0016491//oxidoreductase activity;	ko00903(Limonene and pinene degradation);ko00770(Pantothenate and CoA biosynthesis);ko00620(Pyruvate metabolism);ko00561(Glycerolipid metabolism);ko00410(beta-Alanine metabolism);ko00380(Tryptophan metabolism);ko00340(Histidine metabolism);ko00330(Arginine and proline metabolism);ko00310(Lysine degradation);ko00280(Valine, leucine and isoleucine degradation);ko00071(Fatty acid degradation);ko0005…	Aldehyde dehydrogenase (AHRD V3.3 A0A200Q0A3_9MAGN)
Solyc08g082110.4	158.464	394.708	2.49085	1.31664	0.000145925	0.0361047	GO:0003700;GO:0006355;GO:0043565	-	-	-	-	-	GO:0006355//regulation of transcription, DNA-templated;	-	GO:0003700//DNA-binding transcription factor activity;GO:0043565//sequence-specific DNA binding;	-	WRKY transcription factor 54
Solyc04g081140.1	279.183	771.685	2.76408	1.4668	0.000151777	0.0371983	-	-	virNOG11621	R	sp|Q9FYG4|GLOX1_ARATH Aldehyde oxidase GLOX1 OS=Arabidopsis thaliana GN=GLOX1 PE=2 SV=1	gi|460385859|ref|XP_004238618.1| PREDICTED: galactose oxidase-like [Solanum lycopersicum]	-	-	-	-	Glyoxal oxidase-related protein (AHRD V3.3 A0A2U1MRW9_ARTAN)
Solyc06g050340.3	89.7184	218.862	2.43943	1.28654	0.000154065	0.0374062	-	-	-	-	-	gi|460390523|ref|XP_004240880.1| PREDICTED: high mobility group B protein 7 isoform X1 [Solanum lycopersicum] gi|723705925|ref|XP_010322144.1| PREDICTED: high mobility group B protein 7 isoform X1 [Solanum lycopersicum]	-	-	-	-	high mobility group B protein 7 isoform X1 (AHRD V3.3 XP_025887246.1)
Solyc04g009260.3	8.81995	46.5162	5.27397	2.39889	0.000157562	0.037901	GO:0043531	-	-	-	-	-	-	-	GO:0043531//ADP binding;	-	Disease resistance protein (AHRD V3.3 A0A200PUC6_9MAGN)
Solyc06g005770.1	14.9062	61.9531	4.15619	2.05526	0.000167923	0.0396588	-	-	virNOG26339;virNOG21781	R	sp|P85894|LTP1_MORNI Non-specific lipid-transfer protein 1 OS=Morus nigra PE=1 SV=1	gi|723703719|ref|XP_004240614.2| PREDICTED: non-specific lipid-transfer protein 1-like [Solanum lycopersicum]	-	-	-	-	Non-specific lipid-transfer protein (AHRD V3.3 K4C359_SOLLC)
Solyc01g105960.2	102.099	245.111	2.40071	1.26346	0.000201243	0.0468676	GO:0010333;GO:0016829	-	virNOG00163	R	sp|Q6PWU2|ATESY_VITVI (-)-alpha-terpineol synthase OS=Vitis vinifera PE=1 SV=1	gi|460371064|ref|XP_004231365.1| PREDICTED: terpene synthase 10 [Solanum lycopersicum] gi|343197042|gb|AEM05857.1| cineol synthase [Solanum lycopersicum]	-	-	GO:0010333//terpene synthase activity;GO:0016829//lyase activity;	-	Cineol synthase (AHRD V3.3 G1JUH5_SOLLC)
Solyc05g006440.4	13.9397	59.7218	4.2843	2.09906	0.000202054	0.0468676	-	-	-	-	-	-	-	-	-	-	transmembrane protein (AHRD V3.3 AT3G17930.1)
Solyc02g079520.3	73.7622	185.456	2.51425	1.33013	0.000213397	0.0490606	GO:0005509	-	-	-	-	-	-	-	GO:0005509//calcium ion binding;	-	Calcium-binding protein PBP1 (AHRD V3.3 A0A1U8G283_CAPAN)
Solyc03g114930.3	32.2482	100.693	3.12243	1.64267	0.000216552	0.0493493	GO:0005509;GO:0009523;GO:0009654;GO:0015979;GO:0019898	K02717	virNOG09251	G	sp|P82538|PPL1_ARATH PsbP-like protein 1, chloroplastic OS=Arabidopsis thaliana GN=PPL1 PE=1 SV=1	gi|460380645|ref|XP_004236065.1| PREDICTED: psbP-like protein 1, chloroplastic [Solanum lycopersicum] gi|723687080|ref|XP_010318868.1| PREDICTED: psbP-like protein 1, chloroplastic [Solanum lycopersicum] gi|723687083|ref|XP_010318870.1| PREDICTED: psbP-like protein 1, chloroplastic [Solanum lycopersicum] gi|723687086|ref|XP_010318871.1| PREDICTED: psbP-like protein 1, chloroplastic [Solanum lycop…	GO:0015979//photosynthesis;	GO:0009523//photosystem II;GO:0009654//photosystem II oxygen evolving complex;GO:0019898//extrinsic component of membrane;	GO:0005509//calcium ion binding;	ko00195(Photosynthesis)	PsbP-like protein 1, chloroplastic (AHRD V3.3 A0A2G3A242_CAPAN)
Solyc12g055940.3	127.004	293.072	2.30758	1.20638	0.000237166	0.0529778	-	-	-	-	-	-	-	-	-	-	Pentatricopeptide repeat (PPR) superfamily protein (AHRD V3.3 AT1G64430.2)
Solyc03g117880.1	0	13.0153	Inf	Inf	0.000237282	0.0529778	-	-	KOG2581	O	-	-	-	-	-	-	Unknown protein
Solyc03g093610.1	746.421	1518.9	2.03491	1.02497	0.000238593	0.0529778	GO:0003700;GO:0006355	K09286	virNOG18409	K	sp|Q84XB3|ERF1_SOLLC Ethylene-responsive transcription factor 1 OS=Solanum lycopersicum GN=ERF1 PE=2 SV=1	gi|723683100|ref|XP_004235186.2| PREDICTED: ethylene-responsive transcription factor 1 [Solanum lycopersicum]	GO:0006355//regulation of transcription, DNA-templated;	-	GO:0003700//DNA-binding transcription factor activity;	-	ethylene response factor A.2
Solyc08g079240.4	35.9703	108.206	3.00822	1.58891	0.000246597	0.0542911	-	-	-	-	-	-	-	-	-	-	dimethylallyl%2C adenosine tRNA methylthiotransferase (AHRD V3.3 AT1G62780.1)
Solyc05g009420.1	654.449	1325.76	2.02577	1.01847	0.000267259	0.0583456	-	-	virNOG23580	S	-	gi|460386494|ref|XP_004238933.1| PREDICTED: uncharacterized protein LOC101255885 [Solanum lycopersicum]	-	-	-	-	transmembrane protein (AHRD V3.3 AT1G25400.2)
Solyc07g008290.4	99.2612	227.244	2.28936	1.19494	0.000286455	0.0610757	-	-	-	-	-	-	-	-	-	-	O-fucosyltransferase family protein (AHRD V3.3 A0A061GA16_THECC)
Solyc03g031420.1	298.368	622.669	2.08692	1.06137	0.000289855	0.0612206	-	-	virNOG04126	H	sp|Q9N0E7|MOCOS_BOVIN Molybdenum cofactor sulfurase OS=Bos taurus GN=MOCOS PE=2 SV=3	gi|460377368|ref|XP_004234465.1| PREDICTED: molybdenum cofactor sulfurase-like [Solanum lycopersicum]	-	-	-	-	molybdenum cofactor sulfurase (AHRD V3.3 A0A2I4FGR8_9ROSI)
Solyc09g007480.3	6.48483	37.1846	5.73409	2.51957	0.000295331	0.0613432	-	-	-	-	-	gi|723728418|ref|XP_010326007.1| PREDICTED: uncharacterized protein LOC101252623 [Solanum lycopersicum]	-	-	-	-	transmembrane protein (AHRD V3.3 AT5G03120.1)
Solyc08g082160.3	85.0691	245.648	2.88763	1.52989	0.000301855	0.0613432	-	-	virNOG23813	S	-	gi|970046211|ref|XP_015084607.1| PREDICTED: uncharacterized protein LOC107028064 [Solanum pennellii]	-	-	-	-	subtilisin-like serine protease 3 (AHRD V3.3 AT2G19170.2)
Solyc05g052560.1	440.638	1310.64	2.97442	1.57261	0.000304609	0.0613432	-	-	virNOG01784	R	-	gi|460388576|ref|XP_004239943.1| PREDICTED: zinc finger CCCH domain-containing protein 29-like [Solanum lycopersicum]	-	-	-	-	Unknown protein
Solyc03g097170.3	356.71	727.815	2.04036	1.02882	0.000320018	0.0631269	GO:0003854;GO:0006694;GO:0016616;GO:0055114	-	virNOG01620;KOG1502	V	sp|Q0JKZ0|SNL6_ORYSJ Cinnamoyl-CoA reductase-like SNL6 OS=Oryza sativa subsp. japonica GN=SNL6 PE=3 SV=1	gi|460379158|ref|XP_004235331.1| PREDICTED: cinnamoyl-CoA reductase 1-like [Solanum lycopersicum]	GO:0006694//steroid biosynthetic process;GO:0055114//obsolete oxidation-reduction process;	-	GO:0003854//3-beta-hydroxy-delta5-steroid dehydrogenase activity;GO:0016616//oxidoreductase activity, acting on the CH-OH group of donors, NAD or NADP as acceptor;	-	NAD(P)-binding Rossmann-fold superfamily protein (AHRD V3.3 A0A2U1LGD5_ARTAN)
Solyc01g110360.3	9.25164	44.0237	4.75847	2.2505	0.00032075	0.0631269	GO:0004332;GO:0006096	K01623	virNOG10404	G	sp|Q944G9|ALFP2_ARATH Fructose-bisphosphate aldolase 2, chloroplastic OS=Arabidopsis thaliana GN=FBA2 PE=1 SV=2	gi|460370090|ref|XP_004230887.1| PREDICTED: fructose-bisphosphate aldolase 1, chloroplastic [Solanum lycopersicum] gi|970000709|ref|XP_015054818.1| PREDICTED: fructose-bisphosphate aldolase 1, chloroplastic [Solanum pennellii]	GO:0006096//glycolytic process;	-	GO:0004332//fructose-bisphosphate aldolase activity;	ko00710(Carbon fixation in photosynthetic organisms);ko00051(Fructose and mannose metabolism);ko00030(Pentose phosphate pathway);ko00010(Glycolysis / Gluconeogenesis)	Fructose-bisphosphate aldolase (AHRD V3.3 Q9SXX5_NICPA)
Solyc12g088220.2	397.541	1474.91	3.71008	1.89145	0.00032741	0.0639532	GO:0003824	K00826	virNOG03879;COG0115	E	sp|Q9M439|BCAT2_ARATH Branched-chain-amino-acid aminotransferase 2, chloroplastic OS=Arabidopsis thaliana GN=BCAT2 PE=1 SV=1	gi|723752266|ref|XP_010314598.1| PREDICTED: branched-chain-amino-acid aminotransferase 2, chloroplastic-like [Solanum lycopersicum]	-	-	GO:0003824//catalytic activity;	ko00966(Glucosinolate biosynthesis);ko00770(Pantothenate and CoA biosynthesis);ko00290(Valine, leucine and isoleucine biosynthesis);ko00280(Valine, leucine and isoleucine degradation);ko00270(Cysteine and methionine metabolism)	SlBCAT1
Solyc01g010350.4	859.577	2202.83	2.56269	1.35766	0.000348625	0.0675472	-	K15283	-	-	-	-	-	-	-	-	triose phosphate/phosphate translocator, chloroplastic-like (AHRD V3.3 A0A2I4H880_9ROSI)
Solyc04g015850.3	493.875	1031.8	2.08919	1.06294	0.000376629	0.0719444	-	-	-	-	-	-	-	-	-	-	Transmembrane protein (AHRD V3.3 Q9M2K7_ARATH)
Solyc11g011110.3	377.65	764.988	2.02566	1.01839	0.000417468	0.0791636	GO:0016788	-	-	-	-	-	-	-	GO:0016788//hydrolase activity, acting on ester bonds;	-	GDSL esterase/lipase (AHRD V3.3 A0A1U8GTX9_CAPAN)
Solyc11g018490.3	30.2572	91.1173	3.01143	1.59045	0.000422951	0.0796221	GO:0030246	-	-	-	-	-	-	-	GO:0030246//carbohydrate binding;	-	Beta-galactosidase (AHRD V3.3 A0A2G2ZP46_CAPAN)
Solyc07g044860.3	309.921	719.734	2.32231	1.21556	0.000448169	0.0837624	GO:0005509;GO:0009523;GO:0009654;GO:0015979;GO:0019898	K02717	virNOG10974	R	sp|P29795|PSBP_SOLLC Oxygen-evolving enhancer protein 2, chloroplastic OS=Solanum lycopersicum GN=PSBP PE=2 SV=1	gi|929045135|ref|NP_001234109.2| oxygen-evolving enhancer protein 2, chloroplastic [Solanum lycopersicum]	GO:0015979//photosynthesis;	GO:0009523//photosystem II;GO:0009654//photosystem II oxygen evolving complex;GO:0019898//extrinsic component of membrane;	GO:0005509//calcium ion binding;	ko00195(Photosynthesis)	psbXphotosystem II 23 kDa protein
Solyc05g055220.1	88.264	219.484	2.48668	1.31422	0.000471849	0.0869374	-	-	virNOG18717	S	sp|Q9FMC8|OPF13_ARATH Transcription repressor OFP13 OS=Arabidopsis thaliana GN=OFP13 PE=1 SV=1	gi|460389083|ref|XP_004240188.1| PREDICTED: transcription repressor OFP13-like [Solanum lycopersicum]	-	-	-	-	ovate family protein 10
Solyc01g111900.4	48.5794	155.743	3.20595	1.68075	0.000489321	0.0888955	GO:0008171	-	-	-	-	-	-	-	GO:0008171//O-methyltransferase activity;	-	O-methyltransferase (AHRD V3.3 A0A2S1PVB6_CAMAC)
Solyc08g014490.1	2703.31	9170.8	3.39243	1.76232	0.000500161	0.0902339	GO:0016747	K13065	-	-	sp|K4D9Y4|ASAT3_SOLLC Acylsugar acyltransferase 3 OS=Solanum lycopersicum GN=ASAT3 PE=2 SV=1	gi|460398557|ref|XP_004244824.1| PREDICTED: deacetylvindoline O-acetyltransferase-like [Solanum lycopersicum]	-	-	GO:0016747//acyltransferase activity, transferring groups other than amino-acyl groups;	ko00945(Stilbenoid, diarylheptanoid and gingerol biosynthesis);ko00941(Flavonoid biosynthesis);ko00940(Phenylpropanoid biosynthesis)	HXXXD-type acyl-transferase family protein (AHRD V3.3 F4JBC7_ARATH)
Solyc01g080260.3	256.087	516.594	2.01726	1.0124	0.000506128	0.0906806	-	-	virNOG05078	S	-	gi|460367409|ref|XP_004229566.1| PREDICTED: uncharacterized protein LOC101247158 [Solanum lycopersicum]	-	-	-	-	ARM repeat superfamily protein (AHRD V3.3 A0A2U1LFG7_ARTAN)
Solyc05g050220.3	236.998	485.859	2.05005	1.03566	0.00052567	0.0929005	GO:0003700;GO:0006355	K09060	virNOG14506	K	sp|Q99089|CPRF1_PETCR Common plant regulatory factor 1 OS=Petroselinum crispum GN=CPRF1 PE=2 SV=1	gi|723702575|ref|XP_010321523.1| PREDICTED: transcriptional activator TAF-1-like [Solanum lycopersicum]	GO:0006355//regulation of transcription, DNA-templated;	-	GO:0003700//DNA-binding transcription factor activity;	-	Common plant regulatory factor 1 (AHRD V3.3 A0A1U8DT23_CAPAN)
Solyc12g008430.3	97.8984	239.536	2.44678	1.29089	0.000573598	0.0996358	GO:0004471;GO:0055114	K00029	-	-	-	-	GO:0055114//obsolete oxidation-reduction process;	-	GO:0004471//malate dehydrogenase (decarboxylating) (NAD+) activity;	ko00710(Carbon fixation in photosynthetic organisms);ko00620(Pyruvate metabolism)	Malic enzyme (AHRD V3.3 A0A2G3BMK9_CAPCH)
Solyc12g005240.1	14.3015	53.7546	3.75867	1.91022	0.000575287	0.0996358	-	-	virNOG09782	S	-	gi|723747007|ref|XP_010313653.1| PREDICTED: uncharacterized protein LOC104644816 [Solanum lycopersicum]	-	-	-	-	plant/protein (DUF1995) (AHRD V3.3 AT3G20680.1)
Solyc10g006330.3	8.53152	48.5446	5.69003	2.50844	0.00058866	0.101277	-	-	virNOG02637	S	sp|Q9C8E6|PMI1_ARATH Protein PLASTID MOVEMENT IMPAIRED 1 OS=Arabidopsis thaliana GN=PMI1 PE=1 SV=1	gi|723734743|ref|XP_010327172.1| PREDICTED: uncharacterized protein LOC101255738 [Solanum lycopersicum]	-	-	-	-	protein PLASTID MOVEMENT IMPAIRED 1 (AHRD V3.3 A0A2I4GWL2_9ROSI)
Solyc02g087090.4	1399.07	2920.82	2.08768	1.0619	0.000599817	0.10193	-	-	-	-	-	-	-	-	-	-	alpha-DOX2
Solyc10g008810.3	114.775	251.468	2.19097	1.13157	0.00060682	0.10193	GO:0016788	-	virNOG13810	I	sp|Q9FJ40|GDL86_ARATH GDSL esterase/lipase At5g45960 OS=Arabidopsis thaliana GN=At5g45960 PE=2 SV=1	gi|723733995|ref|XP_004248132.2| PREDICTED: GDSL esterase/lipase At5g45960-like [Solanum lycopersicum]	-	-	GO:0016788//hydrolase activity, acting on ester bonds;	-	GDSL esterase/lipase (AHRD V3.3 A0A2G2YJS1_CAPAN)
Solyc02g090030.2	172.551	369.944	2.14397	1.10028	0.000608153	0.10193	GO:0009654;GO:0010207;GO:0010242;GO:0042549	K02716	-	-	-	-	GO:0010207//photosystem II assembly;GO:0042549//photosystem II stabilization;	GO:0009654//photosystem II oxygen evolving complex;	GO:0010242//oxygen evolving activity;	ko00195(Photosynthesis)	33 kDa oxygen-evolving protein
Solyc08g076220.3	34.1835	97.736	2.85915	1.51559	0.000618017	0.102089	GO:0005524;GO:0016301	K00855	virNOG05206	ZT	sp|P26302|KPPR_WHEAT Phosphoribulokinase, chloroplastic OS=Triticum aestivum PE=2 SV=1	gi|460400830|ref|XP_004245935.1| PREDICTED: phosphoribulokinase, chloroplastic [Solanum lycopersicum]	-	-	GO:0005524//ATP binding;GO:0016301//kinase activity;	ko00710(Carbon fixation in photosynthetic organisms)	Phosphoribulokinase (AHRD V3.3 A0A1U8GUA7_CAPAN)
Solyc02g078130.3	18.7976	65.0811	3.4622	1.79169	0.000621601	0.102089	GO:0046983	-	virNOG20748	K	sp|F4JIJ7|BH162_ARATH Transcription factor bHLH162 OS=Arabidopsis thaliana GN=BHLH162 PE=1 SV=1	gi|460376093|ref|XP_004233835.1| PREDICTED: uncharacterized protein LOC101247399 [Solanum lycopersicum]	-	-	GO:0046983//protein dimerization activity;	-	bHLH transcription factor 079
Solyc10g011730.3	62.9151	151.6	2.40959	1.26879	0.00063144	0.102089	-	-	virNOG25522	R	sp|Q9M373|AGP20_ARATH Arabinogalactan peptide 20 OS=Arabidopsis thaliana GN=AGP20 PE=3 SV=1	gi|460405218|ref|XP_004248073.1| PREDICTED: arabinogalactan peptide 20-like [Solanum lycopersicum]	-	-	-	-	Arabinogalactan peptide (AHRD V3.3 A0A200Q7C1_9MAGN)
Solyc06g050900.3	63.2278	154.84	2.44892	1.29214	0.000639453	0.102089	GO:0016020;GO:0022857;GO:0055085	-	virNOG04084	P	sp|Q8VZR7|PTR30_ARATH Protein NRT1/ PTR FAMILY 5.1 OS=Arabidopsis thaliana GN=NPF5.1 PE=2 SV=2	gi|460390580|ref|XP_004240906.1| PREDICTED: protein NRT1/ PTR FAMILY 5.1 isoform X1 [Solanum lycopersicum]	GO:0055085//transmembrane transport;	GO:0016020//membrane;	GO:0022857//transmembrane transporter activity;	-	Protein NRT1/ PTR FAMILY 5.1 (AHRD V3.3 A0A1U8H5B7_CAPAN)
Solyc08g068230.4	34.3127	148.588	4.33043	2.11451	0.00063992	0.102089	-	K17710	-	-	-	-	-	-	-	-	Pentatricopeptide repeat-containing protein (AHRD V3.3 A0A2G2YYD7_CAPAN)
Solyc12g049140.1	50.3732	151.34	3.00437	1.58706	0.000640442	0.102089	-	-	-	-	-	gi|723751164|ref|XP_010314317.1| PREDICTED: adhesive plaque matrix protein-like [Solanum lycopersicum]	-	-	-	-	Extensin-like protein Ext1 (AHRD V3.3 Q8VWM5_SOLLC)
Solyc03g121230.3	226.196	460.243	2.03471	1.02482	0.000640536	0.102089	GO:0004672;GO:0006468	-	virNOG10857	T	sp|O64483|SIRK_ARATH Senescence-induced receptor-like serine/threonine-protein kinase OS=Arabidopsis thaliana GN=SIRK PE=2 SV=1	gi|723685072|ref|XP_010318523.1| PREDICTED: senescence-induced receptor-like serine/threonine-protein kinase [Solanum lycopersicum]	GO:0006468//protein phosphorylation;	-	GO:0004672//protein kinase activity;	-	Protein kinase family protein (AHRD V3.3 A0A1P8AW67_ARATH)
Solyc05g005180.3	92.2127	208.311	2.25903	1.1757	0.00067072	0.105419	GO:0003824	K01661	virNOG06850	H	sp|Q8GYN9|MENB_ARATH 1,4-dihydroxy-2-naphthoyl-CoA synthase, peroxisomal OS=Arabidopsis thaliana GN=MENB PE=1 SV=2	gi|460385924|ref|XP_004238650.1| PREDICTED: 1,4-Dihydroxy-2-naphthoyl-CoA synthase, peroxisomal [Solanum lycopersicum]	-	-	GO:0003824//catalytic activity;	ko00130(Ubiquinone and other terpenoid-quinone biosynthesis)	1,4-dihydroxy-2-naphthoyl-CoA synthase (AHRD V3.3 A0A2G2XZJ4_CAPAN)
Solyc03g118240.4	114.993	255.107	2.21847	1.14956	0.000673021	0.105419	GO:0015995;GO:0046406	K03428	-	-	-	-	GO:0015995//chlorophyll biosynthetic process;	-	GO:0046406//magnesium protoporphyrin IX methyltransferase activity;	ko00860(Porphyrin metabolism)	Magnesium-protoporphyrin IX methyltransferase (AHRD V3.3 A0A1P8B4G1_ARATH)
Solyc04g015520.3	325.065	804.621	2.47527	1.30758	0.000673607	0.105419	-	-	virNOG18703	S	sp|Q7XII4|REM41_ORYSJ Remorin 4.1 OS=Oryza sativa subsp. japonica GN=REM4.1 PE=1 SV=1	gi|460381789|ref|XP_004236624.1| PREDICTED: putative uncharacterized protein DDB_G0287457 [Solanum lycopersicum]	-	-	-	-	Remorin (AHRD V3.3 A0A200Q6K8_9MAGN)
Solyc06g082080.3	206.311	421.091	2.04105	1.02931	0.000680845	0.105914	GO:0003824	K17506	COG0631;virNOG01720	T	sp|Q8RX37|P2C02_ARATH Probable protein phosphatase 2C 2 OS=Arabidopsis thaliana GN=At1g07160 PE=2 SV=1	gi|460393842|ref|XP_004242517.1| PREDICTED: probable protein phosphatase 2C 25 [Solanum lycopersicum]	-	-	GO:0003824//catalytic activity;	-	Protein phosphatase 2C (AHRD V3.3 O24078_MEDSA)
Solyc03g113240.3	88.1874	198.92	2.25565	1.17354	0.000698926	0.10744	-	-	virNOG15516;virNOG19210	SR	-	gi|460380892|ref|XP_004236187.1| PREDICTED: uncharacterized protein LOC101245045 [Solanum lycopersicum] gi|970019273|ref|XP_015070833.1| PREDICTED: uncharacterized protein LOC107015164 [Solanum pennellii]	-	-	-	-	Transmembrane protein, putative (DUF1118) (AHRD V3.3 Q94F10_ARATH)
Solyc05g013870.4	141.887	304.083	2.14314	1.09973	0.000708991	0.108346	-	-	-	-	-	-	-	-	-	-	Sieve element occlusion b (AHRD V3.3 E2FKJ9_9SOLN)
Solyc01g007950.4	123.113	267.305	2.17123	1.11851	0.000720233	0.108757	GO:0004601;GO:0006979;GO:0020037;GO:0055114	-	-	-	-	-	GO:0006979//response to oxidative stress;GO:0055114//obsolete oxidation-reduction process;	-	GO:0004601//peroxidase activity;GO:0020037//heme binding;	-	Peroxidase (AHRD V3.3 K4ASZ3_SOLLC)
Solyc06g071790.3	298.312	602.302	2.01903	1.01366	0.000721697	0.108757	GO:0003924;GO:0005525	K02358	virNOG04003;COG0050	J	sp|Q43364|EFTUB_NICSY Elongation factor TuB, chloroplastic OS=Nicotiana sylvestris GN=TUFB PE=2 SV=1	gi|460391817|ref|XP_004241515.1| PREDICTED: elongation factor TuB, chloroplastic-like [Solanum lycopersicum]	-	-	GO:0003924//GTPase activity;GO:0005525//GTP binding;	ko04626(Plant-pathogen interaction)	Elongation factor Tu (AHRD V3.3 A0A2G2WM97_CAPBA)
Solyc12g014220.3	51.7269	153.521	2.96791	1.56945	0.000725814	0.108757	GO:0003677	-	-	-	-	-	-	-	GO:0003677//DNA binding;	-	muscle M-line assembly protein (AHRD V3.3 AT1G53800.3)
Solyc06g069170.4	83.3081	192.972	2.31637	1.21186	0.000728425	0.108757	-	-	-	-	-	-	-	-	-	-	AT-rich interactive domain protein (AHRD V3.3 AT1G73885.1)
Solyc05g050710.3	75.5832	178.946	2.36754	1.24339	0.000739805	0.109689	GO:0006629;GO:0008374	-	virNOG05285	I	sp|Q9FZI8|LCAT1_ARATH Lecithin-cholesterol acyltransferase-like 1 OS=Arabidopsis thaliana GN=LCAT1 PE=2 SV=1	gi|460388826|ref|XP_004240065.1| PREDICTED: lecithin-cholesterol acyltransferase-like 1 [Solanum lycopersicum]	GO:0006629//lipid metabolic process;	-	GO:0008374//O-acyltransferase activity;	-	Lecithin-cholesterol acyltransferase-like 1 (AHRD V3.3 A0A2G2WT15_CAPBA)
Solyc09g083130.3	102.89	232.136	2.25616	1.17387	0.000744616	0.109689	GO:0006508;GO:0008236	-	virNOG05795	O	sp|Q0IXP9|AARE1_ORYSJ Acylamino-acid-releasing enzyme 1 OS=Oryza sativa subsp. japonica GN=Os10g0415600 PE=3 SV=1	gi|723732134|ref|XP_010326709.1| PREDICTED: acylamino-acid-releasing enzyme-like isoform X1 [Solanum lycopersicum]	GO:0006508//proteolysis;	-	GO:0008236//serine-type peptidase activity;	-	Acylamino-acid-releasing enzyme (AHRD V3.3 A0A1J3E2A0_NOCCA)
Solyc06g007760.4	143.717	308.856	2.14906	1.1037	0.000750039	0.109689	-	-	-	-	-	-	-	-	-	-	Ycf54-like protein (AHRD V3.3 B4FED9_MAIZE)
Solyc10g085120.3	11.097	47.1388	4.24787	2.08674	0.000789309	0.113919	GO:0004672;GO:0005524;GO:0006468	-	-	-	-	-	GO:0006468//protein phosphorylation;	-	GO:0004672//protein kinase activity;GO:0005524//ATP binding;	-	Leucine-rich receptor-like kinase family protein (AHRD V3.3 G7KRB1_MEDTR)
Solyc02g083810.4	237.446	480.957	2.02555	1.01831	0.000825734	0.117223	GO:0016491;GO:0055114	K02641	-	-	-	-	GO:0055114//obsolete oxidation-reduction process;	-	GO:0016491//oxidoreductase activity;	ko00195(Photosynthesis)	Ferredoxin--NADP reductase, chloroplastic (AHRD V3.3 K4BAP9_SOLLC)
Solyc06g084050.4	1.8193	20.5089	11.273	3.4948	0.000835729	0.117997	GO:0009507;GO:0009523;GO:0015979	K02721	-	-	-	-	GO:0015979//photosynthesis;	GO:0009507//chloroplast;GO:0009523//photosystem II;	-	ko00195(Photosynthesis)	Photosystem II reaction center W protein, chloroplastic (AHRD V3.3 A0A2G2WN23_CAPBA)
Solyc03g111680.3	156.019	325.785	2.08811	1.0622	0.000851371	0.119555	-	-	virNOG02173	L	sp|F4JRP8|STIL2_ARATH Protein STICHEL-like 2 OS=Arabidopsis thaliana GN=At4g24790 PE=3 SV=1	gi|723688099|ref|XP_010319038.1| PREDICTED: protein STICHEL-like 2 [Solanum lycopersicum] gi|723688102|ref|XP_010319039.1| PREDICTED: protein STICHEL-like 2 [Solanum lycopersicum]	-	-	-	-	DNA polymerase III subunit gamma/tau (AHRD V3.3 A0A2K3PCP8_TRIPR)
Solyc10g054420.2	0	10.9417	Inf	Inf	0.000889731	0.123246	GO:0005509;GO:0009523;GO:0009654;GO:0015979;GO:0019898	-	virNOG03188	R	sp|O80634|PNSL1_ARATH Photosynthetic NDH subunit of lumenal location 1, chloroplastic OS=Arabidopsis thaliana GN=PNSL1 PE=1 SV=2	gi|460406466|ref|XP_004248685.1| PREDICTED: psbP-like protein 2, chloroplastic [Solanum lycopersicum]	GO:0015979//photosynthesis;	GO:0009523//photosystem II;GO:0009654//photosystem II oxygen evolving complex;GO:0019898//extrinsic component of membrane;	GO:0005509//calcium ion binding;	-	PsbP-like protein 2 (AHRD V3.3 A0A2U1K9X2_ARTAN)
Solyc12g008440.1	22.9396	70.1464	3.05788	1.61253	0.000891884	0.123246	-	K22378	virNOG27152	O	sp|Q9SNB6|RDUF1_ARATH E3 ubiquitin-protein ligase RDUF1 OS=Arabidopsis thaliana GN=RDUF1 PE=1 SV=1	gi|460413369|ref|XP_004252062.1| PREDICTED: E3 ubiquitin-protein ligase RING1-like [Solanum lycopersicum]	-	-	-	-	RING/U-box superfamily protein (AHRD V3.3 A0A2U1PQW6_ARTAN)
Solyc12g010910.2	2.02598	20.2389	9.98965	3.32043	0.000929507	0.12629	GO:0006629	-	virNOG10005	I	sp|Q9SJI7|PLA20_ARATH Phospholipase A1-IIdelta OS=Arabidopsis thaliana GN=At2g42690 PE=1 SV=1	gi|460412843|ref|XP_004251807.1| PREDICTED: phospholipase A1-IIdelta-like [Solanum lycopersicum]	GO:0006629//lipid metabolic process;	-	-	-	Phospholipase A1-IIdelta (AHRD V3.3 A0A2G2YTM0_CAPAN)
Solyc01g109250.2	129.313	272.865	2.11011	1.07732	0.00093336	0.12629	-	-	virNOG25380	S	-	gi|460370014|ref|XP_004230850.1| PREDICTED: uncharacterized protein LOC101261073 [Solanum lycopersicum]	-	-	-	-	Mitochondrial fission regulator like (AHRD V3.3 A0A2R6RH96_ACTCH)
Solyc06g060560.3	25.17	75.8113	3.01197	1.59071	0.000995939	0.13406	-	-	virNOG26425	S	sp|Q56XJ7|Y4276_ARATH Uncharacterized protein At4g22758 OS=Arabidopsis thaliana GN=At4g22758 PE=2 SV=1	gi|460392820|ref|XP_004242011.1| PREDICTED: uncharacterized protein LOC101256008 [Solanum lycopersicum]	-	-	-	-	hypothetical protein (AHRD V3.3 AT2G27830.1)
Solyc06g072730.4	149.132	312.344	2.09442	1.06655	0.00101771	0.136284	-	-	-	-	-	-	-	-	-	-	WEB family protein, chloroplastic (AHRD V3.3 A0A2G2WMC9_CAPBA)
Solyc07g006300.4	60.3053	144.387	2.39426	1.25958	0.00105816	0.140974	GO:0005506;GO:0008610;GO:0016491;GO:0055114	-	-	-	-	-	GO:0008610//lipid biosynthetic process;GO:0055114//obsolete oxidation-reduction process;	-	GO:0005506//iron ion binding;GO:0016491//oxidoreductase activity;	-	Protein ECERIFERUM 3 (AHRD V3.3 A0A2G3BXC2_CAPCH)
Solyc06g035760.4	3696.65	10021.7	2.71103	1.43884	0.00107086	0.141248	GO:0005506;GO:0016705;GO:0020037;GO:0055114	-	-	-	-	-	GO:0055114//obsolete oxidation-reduction process;	-	GO:0005506//iron ion binding;GO:0016705//oxidoreductase activity, acting on paired donors, with incorporation or reduction of molecular oxygen;GO:0020037//heme binding;	-	Cytochrome P450 (AHRD V3.3 A0A200R0H9_9MAGN)
Solyc06g082300.4	16.6195	57.5788	3.46454	1.79266	0.00107109	0.141248	GO:0016758	-	-	-	-	-	-	-	GO:0016758//hexosyltransferase activity;	-	UDP-glycosyltransferase 87A1-like (AHRD V3.3 A0A2I4FAC3_9ROSI)
Solyc03g118120.3	87.3638	195.843	2.24169	1.16459	0.00108319	0.142122	-	-	virNOG07577	R	sp|Q67YC9|Y4141_ARATH Uncharacterized protein At4g14100 OS=Arabidopsis thaliana GN=At4g14100 PE=2 SV=1	gi|460380223|ref|XP_004235857.1| PREDICTED: uncharacterized protein At4g14100-like [Solanum lycopersicum]	-	-	-	-	Transferring glycosyl group transferase (AHRD V3.3 A0A2K3L539_TRIPR)
Solyc05g009080.4	2.51635	22.0137	8.74826	3.129	0.00109282	0.142665	-	-	-	-	-	-	-	-	-	-	Cyclase/dehydrase family protein (AHRD V3.3 A0A2K3P6S6_TRIPR)
Solyc05g013150.4	35.0097	96.0198	2.74266	1.45558	0.0011046	0.143482	-	-	-	-	-	-	-	-	-	-	ribulose-1,5 bisphosphate carboxylase/oxygenase large subunit N-methyltransferase, chloroplastic-like (AHRD V3.3 A0A2G2YDB5_CAPAN)
Solyc07g062530.3	116.746	327.562	2.80577	1.4884	0.00112714	0.145231	GO:0006099;GO:0008964;GO:0015977	K01595	COG2352;virNOG02027	C	sp|P29196|CAPP_SOLTU Phosphoenolpyruvate carboxylase OS=Solanum tuberosum GN=PPC1 PE=2 SV=2	gi|1003700994|ref|NP_001307823.1| phosphoenolpyruvate carboxylase [Solanum lycopersicum] gi|723718838|ref|XP_010324390.1| PREDICTED: phosphoenolpyruvate carboxylase [Solanum lycopersicum]	GO:0006099//tricarboxylic acid cycle;GO:0015977//carbon fixation;	-	GO:0008964//phosphoenolpyruvate carboxylase activity;	ko00710(Carbon fixation in photosynthetic organisms);ko00620(Pyruvate metabolism)	phosphoenolpyruvate carboxylase 2
Solyc04g081755.2	58.7819	140.051	2.38255	1.25251	0.00115478	0.147783	GO:0016788	-	-	-	-	-	-	-	GO:0016788//hydrolase activity, acting on ester bonds;	-	GDSL esterase/lipase (AHRD V3.3 A0A2G2ZSP1_CAPAN)
Solyc10g087035.1	1.63215	18.4695	11.316	3.5003	0.0011801	0.150283	GO:0005506;GO:0016705;GO:0020037;GO:0055114	-	-	-	-	-	GO:0055114//obsolete oxidation-reduction process;	-	GO:0005506//iron ion binding;GO:0016705//oxidoreductase activity, acting on paired donors, with incorporation or reduction of molecular oxygen;GO:0020037//heme binding;	-	Cytochrome (AHRD V3.3 A0A1U8F0H8_CAPAN)
Solyc11g009100.2	113.147	235.794	2.08397	1.05933	0.00131109	0.162574	GO:0016020	-	NOG16751;virNOG06274	QR	sp|Q8RXN0|AB11G_ARATH ABC transporter G family member 11 OS=Arabidopsis thaliana GN=ABCG11 PE=1 SV=1	gi|723741506|ref|XP_010312634.1| PREDICTED: ABC transporter G family member 11-like [Solanum lycopersicum]	-	GO:0016020//membrane;	-	-	ABC transporter-like (AHRD V3.3 A0A200QYY8_9MAGN)
Solyc03g078830.1	30.5243	83.4321	2.7333	1.45064	0.00131419	0.162574	-	-	-	-	sp|Q9SD53|Y3720_ARATH UPF0481 protein At3g47200 OS=Arabidopsis thaliana GN=At3g47200 PE=2 SV=1	gi|460378590|ref|XP_004235053.1| PREDICTED: UPF0481 protein At3g47200-like [Solanum lycopersicum] gi|723682598|ref|XP_010318074.1| PREDICTED: UPF0481 protein At3g47200-like [Solanum lycopersicum]	-	-	-	-	UPF0481 protein At3g47200-like (AHRD V3.3 A0A2I4FE23_9ROSI)
Solyc03g093390.4	1103.46	3383.77	3.06651	1.6166	0.00132042	0.162574	-	-	-	-	-	-	-	-	-	-	beta expansin precursor 2
Solyc02g084440.4	250.921	626.432	2.49653	1.31992	0.00134153	0.164394	GO:0004332;GO:0006096	K01623	-	-	-	-	GO:0006096//glycolytic process;	-	GO:0004332//fructose-bisphosphate aldolase activity;	ko00710(Carbon fixation in photosynthetic organisms);ko00051(Fructose and mannose metabolism);ko00030(Pentose phosphate pathway);ko00010(Glycolysis / Gluconeogenesis)	Fructose-bisphosphate aldolase (AHRD V3.3 A0A2G3AA97_CAPAN)
Solyc12g008980.3	17.3692	56.3908	3.24661	1.69893	0.0013664	0.165734	-	K06444	-	-	-	-	-	-	-	ko00906(Carotenoid biosynthesis)	Delta,Pfam:PF05834
Solyc03g026050.3	32.4922	88.18	2.71388	1.44036	0.00138338	0.165734	-	K06910	virNOG18176	R	sp|Q9XH44|CET1_TOBAC CEN-like protein 1 OS=Nicotiana tabacum GN=CET1 PE=2 SV=1	gi|460377175|ref|XP_004234370.1| PREDICTED: CEN-like protein 1 [Solanum lycopersicum]	-	-	-	-	Terminal flower 1 (AHRD V3.3 F7J0V7_GENTR)
Solyc10g081550.2	722.979	2586.19	3.57713	1.8388	0.00138436	0.165734	GO:0005506;GO:0016705;GO:0020037;GO:0055114	-	COG2124;virNOG00971;NOG24749	QO	sp|Q9SZ46|C82C4_ARATH Cytochrome P450 82C4 OS=Arabidopsis thaliana GN=CYP82C4 PE=2 SV=1	gi|460407880|ref|XP_004249377.1| PREDICTED: cytochrome P450 82C4-like [Solanum lycopersicum]	GO:0055114//obsolete oxidation-reduction process;	-	GO:0005506//iron ion binding;GO:0016705//oxidoreductase activity, acting on paired donors, with incorporation or reduction of molecular oxygen;GO:0020037//heme binding;	-	Cytochrome P450 (AHRD V3.3 A0A2U1Q1Z2_ARTAN)
Solyc12g099650.2	6.08387	31.3833	5.15843	2.36693	0.00139336	0.166046	-	-	virNOG26674;virNOG26360	S	sp|B3EWI4|PST2_PETHY Photosystem II 5 kDa protein, chloroplastic OS=Petunia hybrida PE=1 SV=1	gi|460415093|ref|XP_004252895.1| PREDICTED: photosystem II 5 kDa protein, chloroplastic-like [Solanum lycopersicum]	-	-	-	-	Photosystem II 5 kDa protein, chloroplastic (AHRD V3.3 A0A2G3B5K3_CAPCH)
Solyc01g109150.4	347.813	937.239	2.69466	1.4301	0.00142437	0.168967	GO:0005506;GO:0016705;GO:0020037;GO:0055114	K01723	virNOG07555	Q	sp|Q8GZP5|AOS3_SOLLC Allene oxide synthase 3 OS=Solanum lycopersicum GN=AOS3 PE=1 SV=1	gi|807045803|ref|NP_001234502.2| cytochrome P450 CYP74C4 [Solanum lycopersicum]	GO:0055114//obsolete oxidation-reduction process;	-	GO:0005506//iron ion binding;GO:0016705//oxidoreductase activity, acting on paired donors, with incorporation or reduction of molecular oxygen;GO:0020037//heme binding;	ko00592(alpha-Linolenic acid metabolism)	cytochrome P450 CYP74C4
Solyc04g080820.2	154.288	373.661	2.42184	1.2761	0.00158054	0.183307	GO:0009690;GO:0019139;GO:0050660;GO:0055114	K00279	virNOG02207	C	sp|Q67YU0|CKX5_ARATH Cytokinin dehydrogenase 5 OS=Arabidopsis thaliana GN=CKX5 PE=2 SV=1	gi|525314326|ref|NP_001266251.1| cytokinin oxidase/dehydrogenase-like precursor [Solanum lycopersicum] gi|383212272|dbj|BAM09006.1| cytokinin oxidase/dehydrogenase-like [Solanum lycopersicum]	GO:0009690//cytokinin metabolic process;GO:0055114//obsolete oxidation-reduction process;	-	GO:0019139//cytokinin dehydrogenase activity;GO:0050660//flavin adenine dinucleotide binding;	ko00908(Zeatin biosynthesis)	cytokinin oxidase4
Solyc06g054260.1	369.117	970.226	2.6285	1.39424	0.00168047	0.193172	GO:0009522;GO:0009538;GO:0015979	K02692	virNOG08713	H	sp|P12372|PSAD_SOLLC Photosystem I reaction center subunit II, chloroplastic OS=Solanum lycopersicum GN=psaD PE=2 SV=1	gi|822092552|ref|NP_001295880.1| photosystem I reaction center subunit II, chloroplastic [Solanum lycopersicum] gi|131166|sp|P12372.1|PSAD_SOLLC RecName: Full=Photosystem I reaction center subunit II, chloroplastic; AltName: Full=Photosystem I 20 kDa subunit; Short=PSI-D; Flags: Precursor gi|170492|gb|AAA34185.1| photosystem I subunit II protein precursor [Solanum lycopersicum] gi|226544|prf||160…	GO:0015979//photosynthesis;	GO:0009522//photosystem I;GO:0009538//photosystem I reaction center;	-	ko00195(Photosynthesis)	photosystem 1 reaction center protein subunit 2
Solyc08g083190.3	88.9491	192.881	2.16844	1.11666	0.00171737	0.19617	-	-	virNOG08822	R	sp|Q8LFX7|BDG1_ARATH Probable lysophospholipase BODYGUARD 1 OS=Arabidopsis thaliana GN=BDG1 PE=2 SV=1	gi|460399859|ref|XP_004245454.1| PREDICTED: uncharacterized protein LOC101263046 [Solanum lycopersicum]	-	-	-	-	Alpha/beta-Hydrolases superfamily protein (AHRD V3.3 A0A2U1LI82_ARTAN)
Solyc05g014560.3	62.4485	143.633	2.30003	1.20165	0.00172165	0.19617	-	K00059	NOG00461;virNOG02087	QR	sp|P28643|FABG_CUPLA 3-oxoacyl-[acyl-carrier-protein] reductase, chloroplastic OS=Cuphea lanceolata GN=CLKR27 PE=2 SV=1	gi|460387013|ref|XP_004239186.1| PREDICTED: 3-oxoacyl-[acyl-carrier-protein] reductase 4-like [Solanum lycopersicum]	-	-	-	ko00780(Biotin metabolism);ko00061(Fatty acid biosynthesis)	3-oxoacyl-[acyl-carrier-protein] reductase, chloroplastic (AHRD V3.3 A0A2I0XGI5_9ASPA),Pfam:PF13561
Solyc06g054660.1	94.5881	212.108	2.24244	1.16507	0.00173832	0.19672	-	-	virNOG26304	S	-	gi|697150904|ref|XP_009629659.1| PREDICTED: uncharacterized protein LOC104119782 [Nicotiana tomentosiformis]	-	-	-	-	tracheary element differentiation-related 7 (AHRD V3.3 AT5G48920.1)
Solyc04g054960.1	44.9934	163.297	3.62934	1.85971	0.00174919	0.19672	-	-	virNOG23185	S	sp|Q9ZVD2|NHL13_ARATH NDR1/HIN1-like protein 13 OS=Arabidopsis thaliana GN=NHL13 PE=2 SV=1	gi|460383381|ref|XP_004237404.1| PREDICTED: uncharacterized protein LOC101263106 [Solanum lycopersicum]	-	-	-	-	Late embryogenesis abundant (LEA) hydroxyproline-rich glycoprotein family (AHRD V3.3 Q84VP8_ARATH)
Solyc04g079450.4	38.5992	103.882	2.69131	1.42831	0.00176449	0.196823	-	-	-	-	-	-	-	-	-	-	Serpin-ZX (AHRD V3.3 A0A2G2ZRU3_CAPAN)
Solyc12g005300.2	126.756	260.211	2.05285	1.03763	0.00176527	0.196823	-	K08099	virNOG10097;virNOG26556	HR	sp|Q9M7I7|CLH2_ARATH Chlorophyllase-2, chloroplastic OS=Arabidopsis thaliana GN=CLH2 PE=1 SV=1	gi|460412186|ref|XP_004251483.1| PREDICTED: chlorophyllase-2, chloroplastic-like [Solanum lycopersicum]	-	-	-	ko00860(Porphyrin metabolism)	Chlorophyllase 2 (AHRD V3.3 C1JZ62_9ROSI),Pfam:PF12740
Solyc01g104110.4	1103.66	2231.32	2.02174	1.0156	0.00185331	0.204166	GO:0045735	-	-	-	-	-	-	-	GO:0045735//nutrient reservoir activity;	-	11-S seed storage protein (AHRD V3.3 A0A2U1KM33_ARTAN)
Solyc06g073580.4	3780.62	13117.1	3.46956	1.79475	0.00195756	0.212418	GO:0016491;GO:0055114	-	-	-	-	-	GO:0055114//obsolete oxidation-reduction process;	-	GO:0016491//oxidoreductase activity;	-	1-aminocyclopropane-1-carboxylate oxidase1
Solyc06g007880.1	1.72039	17.2916	10.051	3.32926	0.00208434	0.221505	-	-	virNOG19532;virNOG24104	O	-	gi|460389636|ref|XP_004240457.1| PREDICTED: polycomb group RING finger protein 6 [Solanum lycopersicum]	-	-	-	-	RING/U-box superfamily protein (AHRD V3.3 A0A1I9LSG2_ARATH)
Solyc09g059240.3	153.68	324.295	2.1102	1.07738	0.00216083	0.225446	GO:0005506;GO:0016705;GO:0020037;GO:0055114	K17961	virNOG09201	Q	sp|Q9SZ46|C82C4_ARATH Cytochrome P450 82C4 OS=Arabidopsis thaliana GN=CYP82C4 PE=2 SV=1	gi|460403149|ref|XP_004247061.1| PREDICTED: cytochrome P450 82C4-like [Solanum lycopersicum]	GO:0055114//obsolete oxidation-reduction process;	-	GO:0005506//iron ion binding;GO:0016705//oxidoreductase activity, acting on paired donors, with incorporation or reduction of molecular oxygen;GO:0020037//heme binding;	ko00904(Diterpenoid biosynthesis)	Cytochrome P450 (AHRD V3.3 A0A2U1Q1Z2_ARTAN)
Solyc06g006000.3	108.364	276.837	2.5547	1.35315	0.00228126	0.23706	-	-	virNOG17918	S	-	gi|460389514|ref|XP_004240397.1| PREDICTED: uncharacterized protein LOC101264428 [Solanum lycopersicum]	-	-	-	-	Maternal effect embryo arrest 59 (AHRD V3.3 B6T4K8_MAIZE)
Solyc03g071590.3	10.3159	39.7797	3.85617	1.94717	0.00231121	0.238265	GO:0016491;GO:0055114	K00051	virNOG05480;COG0039	C	sp|O48902|MDHP_MEDSA Malate dehydrogenase [NADP], chloroplastic OS=Medicago sativa GN=MDH1 PE=2 SV=1	gi|924859512|ref|NP_001234009.2| chloroplast malate dehydrogenase [Solanum lycopersicum]	GO:0055114//obsolete oxidation-reduction process;	-	GO:0016491//oxidoreductase activity;	ko00710(Carbon fixation in photosynthetic organisms);ko00620(Pyruvate metabolism)	chloroplast malate dehydrogenase
Solyc04g071610.4	10796	25789.2	2.38878	1.25627	0.0023627	0.2423	-	-	-	-	-	-	-	-	-	-	Abscicic acid stress ripening 1
Solyc01g105880.4	1045.6	2737.28	2.6179	1.38841	0.00237762	0.2423	GO:0010333;GO:0016829	-	virNOG00163	R	sp|G1JUH1|TPS3_SOLLC (-)-camphene/tricyclene synthase, chloroplastic OS=Solanum lycopersicum GN=TPS3 PE=1 SV=1	gi|350537985|ref|NP_001233809.1| beta-phellandrene/beta-myrcene/sabinene synthase [Solanum lycopersicum] gi|62132629|gb|AAX69064.1| monoterpene synthase 2 [Solanum lycopersicum] gi|343197036|gb|AEM05854.1| beta-phellandrene synthase [Solanum lycopersicum]	-	-	GO:0010333//terpene synthase activity;GO:0016829//lyase activity;	-	Monoterpenoid synthase 2
Solyc02g089880.4	45.0887	109.465	2.42777	1.27963	0.00237833	0.2423	GO:0016757	K20893	-	-	-	-	-	-	GO:0016757//glycosyltransferase activity;	-	Hexosyltransferase (AHRD V3.3 A0A1U8G2N1_CAPAN)
Solyc12g044840.2	97.8993	204.59	2.0898	1.06337	0.0023965	0.242519	GO:0004672;GO:0006468	-	KOG1187;virNOG01817	T	sp|Q9LV48|PERK1_ARATH Proline-rich receptor-like protein kinase PERK1 OS=Arabidopsis thaliana GN=PERK1 PE=2 SV=1	gi|460414023|ref|XP_004252374.1| PREDICTED: inactive protein kinase SELMODRAFT_444075 [Solanum lycopersicum]	GO:0006468//protein phosphorylation;	-	GO:0004672//protein kinase activity;	-	Proline-rich receptor-like protein kinase PERK13 (AHRD V3.3 A0A2G2XXB3_CAPAN)
Solyc02g091560.3	98.5649	203.639	2.06604	1.04687	0.00268615	0.262344	-	K00600	virNOG01873	E	sp|P50433|GLYM_SOLTU Serine hydroxymethyltransferase, mitochondrial OS=Solanum tuberosum PE=2 SV=1	gi|460372325|ref|XP_004231981.1| PREDICTED: serine hydroxymethyltransferase, mitochondrial [Solanum lycopersicum] gi|723669868|ref|XP_010316057.1| PREDICTED: serine hydroxymethyltransferase, mitochondrial [Solanum lycopersicum]	-	-	-	ko00670(One carbon pool by folate);ko00630(Glyoxylate and dicarboxylate metabolism);ko00460(Cyanoamino acid metabolism);ko00260(Glycine, serine and threonine metabolism)	Serine hydroxymethyltransferase (AHRD V3.3 A0A2G3D8E3_CAPCH)
Solyc03g093560.1	705.491	1424.47	2.01912	1.01373	0.00276267	0.267803	GO:0003700;GO:0006355	K09286	virNOG21432	K	sp|Q40478|ERF5_TOBAC Ethylene-responsive transcription factor 5 OS=Nicotiana tabacum GN=ERF5 PE=2 SV=1	gi|45642990|gb|AAS72389.1| ethylene response factor 5 [Solanum lycopersicum]	GO:0006355//regulation of transcription, DNA-templated;	-	GO:0003700//DNA-binding transcription factor activity;	-	ethylene response factor C.6
Solyc10g085110.3	2.54418	19.804	7.78404	2.96052	0.00278644	0.268107	GO:0004672;GO:0005524;GO:0006468	-	-	-	-	-	GO:0006468//protein phosphorylation;	-	GO:0004672//protein kinase activity;GO:0005524//ATP binding;	-	Leucine-rich receptor-like kinase family protein (AHRD V3.3 G7KRB1_MEDTR)
Solyc11g005310.1	176.186	440.938	2.50269	1.32348	0.00285176	0.270661	-	K19040	virNOG18883;KOG0800	O	sp|Q6NQG7|ATL78_ARATH RING-H2 finger protein ATL78 OS=Arabidopsis thaliana GN=ATL78 PE=2 SV=1	gi|723740394|ref|XP_004250442.2| PREDICTED: RING-H2 finger protein ATL78-like [Solanum lycopersicum]	-	-	-	-	RING/U-box superfamily protein (AHRD V3.3 A0A2U1QK74_ARTAN)
Solyc01g105350.3	88.0218	190.612	2.16551	1.1147	0.00285333	0.270661	GO:0016758	-	-	-	-	-	-	-	GO:0016758//hexosyltransferase activity;	-	Glycosyltransferase (AHRD V3.3 A0A1Q3B719_CEPFO)
Solyc10g075070.3	29.5334	76.8165	2.60101	1.37907	0.00285465	0.270661	-	-	-	-	-	-	-	-	-	-	Non-specific lipid-transfer protein (AHRD V3.3 K4D1U9_SOLLC)
Solyc08g008630.4	8.24372	34.7533	4.21573	2.07578	0.00289979	0.27394	-	-	-	-	-	-	-	-	-	-	beta-carotene isomerase D27, chloroplastic (AHRD V3.3 A0A2I4EYC2_9ROSI)
Solyc05g051360.1	49.6577	150.792	3.03663	1.60247	0.00301176	0.281259	GO:0016758	-	virNOG05656	CG	sp|Q66PF2|URT1_FRAAN Putative UDP-rhamnose:rhamnosyltransferase 1 OS=Fragaria ananassa GN=GT4 PE=2 SV=1	gi|460389217|ref|XP_004240255.1| PREDICTED: putative UDP-rhamnose:rhamnosyltransferase 1 [Solanum lycopersicum]	-	-	GO:0016758//hexosyltransferase activity;	-	Glycosyltransferase (AHRD V3.3 A0A2U1PXH3_ARTAN)
Solyc08g048290.4	51.2431	115.994	2.2636	1.17862	0.00302057	0.281259	GO:0016021;GO:0022857;GO:0055085	K08150	-	-	-	-	GO:0055085//transmembrane transport;	GO:0016021//integral component of membrane;	GO:0022857//transmembrane transporter activity;	-	inositol transporter 2
Solyc10g044520.3	244.637	730.531	2.98618	1.5783	0.00303533	0.281624	GO:0009055;GO:0051536	K02639	-	-	-	-	-	-	GO:0009055//electron transfer activity;GO:0051536//iron-sulfur cluster binding;	ko00195(Photosynthesis)	Ferredoxin (AHRD V3.3 A0A0K0PWX6_SOLLC)
Solyc06g076090.3	71.722	154.391	2.15263	1.1061	0.00316219	0.290284	-	K10355	virNOG01114	Z	sp|Q05214|ACT1_TOBAC Actin OS=Nicotiana tabacum PE=3 SV=1	gi|460391240|ref|XP_004241231.1| PREDICTED: actin-82 [Solanum lycopersicum]	-	-	-	-	Actin (AHRD V3.3 A0A1U8H9K1_CAPAN)
Solyc11g012200.3	66.1742	144.878	2.18934	1.1305	0.00325545	0.295711	-	-	-	-	-	-	-	-	-	-	MBOAT (Membrane bound O-acyl transferase) family protein (AHRD V3.3 A0A2U1LYZ9_ARTAN)
Solyc08g069010.4	36.1853	95.5194	2.63973	1.40039	0.00345739	0.310795	-	-	-	-	-	-	-	-	-	-	Pentatricopeptide repeat-containing protein (AHRD V3.3 A0A2G3DE83_CAPCH)
Solyc02g065190.3	863.322	1861.23	2.15589	1.10829	0.00347071	0.310916	GO:0005506;GO:0016705;GO:0020037;GO:0055114	-	virNOG06071	Q	sp|Q8VWZ7|C76B6_CATRO Geraniol 8-hydroxylase OS=Catharanthus roseus GN=CYP76B6 PE=1 SV=1	gi|460375265|ref|XP_004233427.1| PREDICTED: geraniol 8-hydroxylase-like [Solanum lycopersicum]	GO:0055114//obsolete oxidation-reduction process;	-	GO:0005506//iron ion binding;GO:0016705//oxidoreductase activity, acting on paired donors, with incorporation or reduction of molecular oxygen;GO:0020037//heme binding;	-	Cytochrome P450 (AHRD V3.3 A0A1U9X5Y9_THAGA)
Solyc04g016070.2	206.471	599.611	2.90409	1.53808	0.00356367	0.3149	GO:0003700;GO:0005634;GO:0006355	-	virNOG17745;virNOG17975;COG5068	K	-	gi|723690926|ref|XP_010319521.1| PREDICTED: MADS-box transcription factor 23 [Solanum lycopersicum]	GO:0006355//regulation of transcription, DNA-templated;	GO:0005634//nucleus;	GO:0003700//DNA-binding transcription factor activity;	-	agamous-like MADS-box protein AGL15 (AHRD V3.3 A0A2I4ECY7_9ROSI)
Solyc02g077030.3	224.555	492.025	2.19111	1.13166	0.00357935	0.315214	GO:0006629	-	virNOG05413	I	sp|O49523|DSEL_ARATH Phospholipase A1-IIgamma OS=Arabidopsis thaliana GN=DSEL PE=1 SV=1	gi|460374327|ref|XP_004232962.1| PREDICTED: phospholipase A1-IIgamma-like [Solanum lycopersicum]	GO:0006629//lipid metabolic process;	-	-	-	Phospholipase A1-II 1 (AHRD V3.3 A0A2G2VBM1_CAPBA)
Solyc12g006050.2	724.816	1496.08	2.06408	1.0455	0.00359709	0.315706	GO:0016020;GO:0022857;GO:0055085	-	virNOG05537	P	sp|Q9LVE0|PTR33_ARATH Protein NRT1/ PTR FAMILY 6.4 OS=Arabidopsis thaliana GN=NPF6.4 PE=1 SV=1	gi|460412291|ref|XP_004251535.1| PREDICTED: protein NRT1/ PTR FAMILY 6.4 [Solanum lycopersicum]	GO:0055085//transmembrane transport;	GO:0016020//membrane;	GO:0022857//transmembrane transporter activity;	-	Protein NRT1/ PTR FAMILY 6.4 (AHRD V3.3 A0A2G2X304_CAPBA)
Solyc05g009960.4	17.5517	60.4956	3.44671	1.78522	0.00369301	0.321948	GO:0016491;GO:0055114	-	-	-	-	-	GO:0055114//obsolete oxidation-reduction process;	-	GO:0016491//oxidoreductase activity;	-	TauD/TfdA-like domain-containing protein (AHRD V3.3 A0A2U1PT45_ARTAN)
Solyc01g006680.4	471.075	961.059	2.04014	1.02867	0.00390666	0.334659	-	K24444	-	-	-	-	-	-	-	-	2-oxoglutarate (2OG) and Fe(II)-dependent oxygenase superfamily protein (AHRD V3.3 A0A2U1NBL4_ARTAN)
Solyc12g042010.1	106.39	247.738	2.32858	1.21945	0.0039161	0.334659	-	-	virNOG25619	K	sp|Q7XR02|IBH1_ORYSJ Transcription factor IBH1 OS=Oryza sativa subsp. japonica GN=IBH1 PE=1 SV=2	gi|970050832|ref|XP_015086956.1| PREDICTED: transcription factor IBH1-like [Solanum pennellii]	-	-	-	-	transcription factor IBH1-like (AHRD V3.3 A0A2I4G0N0_9ROSI)
Solyc06g051960.3	392.047	908.062	2.31621	1.21176	0.00397026	0.33707	GO:0030599;GO:0042545	-	virNOG02192	S	sp|Q9M3B0|PME34_ARATH Probable pectinesterase/pectinesterase inhibitor 34 OS=Arabidopsis thaliana GN=PME34 PE=2 SV=1	gi|460390681|ref|XP_004240956.1| PREDICTED: probable pectinesterase/pectinesterase inhibitor 34 [Solanum lycopersicum]	GO:0042545//cell wall modification;	-	GO:0030599//pectinesterase activity;	-	Pectinesterase (AHRD V3.3 A0A2G2WIV2_CAPBA)
Solyc07g062543.1	92.599	225.351	2.43362	1.28311	0.00400585	0.337883	GO:0016765	-	-	-	-	-	-	-	GO:0016765//transferase activity, transferring alkyl or aryl (other than methyl) groups;	-	UDP-N-acetylglucosamine 1-carboxyvinyltransferase (AHRD V3.3 A0A318R3I0_9STAP)
Solyc04g074440.1	162.311	324.82	2.00123	1.00088	0.00402865	0.338706	-	-	virNOG00701	R	sp|Q9ZPE7|EXO_ARATH Protein EXORDIUM OS=Arabidopsis thaliana GN=EXO PE=2 SV=1	gi|460384466|ref|XP_004237932.1| PREDICTED: protein EXORDIUM-like [Solanum lycopersicum]	-	-	-	-	Protein EXORDIUM-like 1 (AHRD V3.3 A0A2G2ZQI6_CAPAN)
Solyc03g034320.3	82.4441	167.393	2.03038	1.02175	0.00413476	0.341893	GO:0016787	-	virNOG03985	R	sp|Q8H0Z4|GT121_ARATH Putative glutamine amidotransferase GAT1_2.1 OS=Arabidopsis thaliana GN=GAT1_2.1 PE=2 SV=1	gi|460377592|ref|XP_004234575.1| PREDICTED: uncharacterized protein LOC101258830 [Solanum lycopersicum]	-	-	GO:0016787//hydrolase activity;	-	Class I glutamine amidotransferase-like superfamily protein (AHRD V3.3 F4KA45_ARATH)
Solyc03g078150.3	656.768	1417.39	2.15812	1.10978	0.00413747	0.341893	-	K15015	virNOG05244	E	sp|O80668|AVT1A_ARATH Amino acid transporter AVT1A OS=Arabidopsis thaliana GN=AVT1A PE=2 SV=2	gi|460378639|ref|XP_004235076.1| PREDICTED: vacuolar amino acid transporter 1 [Solanum lycopersicum]	-	-	-	-	Amino acid transporter family protein (AHRD V3.3 S8E0T7_9LAMI)
Solyc03g034334.1	5.08598	25.6905	5.05124	2.33664	0.00422426	0.345843	-	-	-	-	-	-	-	-	-	-	Bifunctional inhibitor/plant lipid transfer protein/seed storage helical domain containing protein (AHRD V3.3 A0A2P5BKA3_TREOI)
Solyc05g026550.3	1.21287	14.5414	11.9893	3.58367	0.00443341	0.356698	GO:0016655;GO:0055114	-	virNOG19683	S	sp|Q9CAC5|NDHL_ARATH NAD(P)H-quinone oxidoreductase subunit L, chloroplastic OS=Arabidopsis thaliana GN=ndhL PE=2 SV=1	gi|460387334|ref|XP_004239333.1| PREDICTED: uncharacterized protein LOC101268280 [Solanum lycopersicum]	GO:0055114//obsolete oxidation-reduction process;	-	GO:0016655//oxidoreductase activity, acting on NAD(P)H, quinone or similar compound as acceptor;	-	NADH dehydrogenase-like complex L (AHRD V3.3 A0A0F7CYX9_9ROSI)
Solyc06g073570.4	872.901	2765.76	3.16847	1.66379	0.00448949	0.358991	GO:0005506;GO:0016705;GO:0020037;GO:0055114	-	-	-	-	-	GO:0055114//obsolete oxidation-reduction process;	-	GO:0005506//iron ion binding;GO:0016705//oxidoreductase activity, acting on paired donors, with incorporation or reduction of molecular oxygen;GO:0020037//heme binding;	-	Cytochrome P450 (AHRD V3.3 A0A2U1Q1Z2_ARTAN)
Solyc05g051550.2	69.34	143.485	2.06929	1.04914	0.00451986	0.359087	-	K09422	virNOG04608	K	sp|Q8GWP0|MYB39_ARATH Transcription factor MYB39 OS=Arabidopsis thaliana GN=MYB39 PE=2 SV=1	gi|460388732|ref|XP_004240019.1| PREDICTED: myb-related protein 315-like [Solanum lycopersicum]	-	-	-	-	MYB transcription factor (AHRD V3.3 A0A0U3IU11_MESCR)
Solyc08g014240.4	1334.93	3398.03	2.54548	1.34794	0.00459751	0.361989	GO:0003824	K01649	-	-	-	-	-	-	GO:0003824//catalytic activity;	ko00620(Pyruvate metabolism);ko00290(Valine, leucine and isoleucine biosynthesis)	2-isopropylmalate synthase (AHRD V3.3 B2D157_BRAOL)
Solyc07g063370.2	142.985	327.526	2.29063	1.19574	0.00465298	0.363002	GO:0004553;GO:0005975	K05350	virNOG00545;COG2723	G	sp|Q7XSK0|BGL18_ORYSJ Beta-glucosidase 18 OS=Oryza sativa subsp. japonica GN=BGLU18 PE=3 SV=2	gi|723719123|ref|XP_010324440.1| PREDICTED: beta-glucosidase 18-like [Solanum lycopersicum]	GO:0005975//carbohydrate metabolic process;	-	GO:0004553//hydrolase activity, hydrolyzing O-glycosyl compounds;	ko00940(Phenylpropanoid biosynthesis);ko00500(Starch and sucrose metabolism);ko00460(Cyanoamino acid metabolism)	Beta-glucosidase (AHRD V3.3 B6SYQ7_MAIZE)
Solyc06g082970.3	20.0324	56.436	2.81723	1.49428	0.0049717	0.383263	-	K23052	virNOG09563	O	sp|Q84VQ4|NDHU_ARATH NAD(P)H-quinone oxidoreductase subunit U, chloroplastic OS=Arabidopsis thaliana GN=ndhU PE=1 SV=1	gi|460393698|ref|XP_004242446.1| PREDICTED: uncharacterized protein LOC101259949 [Solanum lycopersicum]	-	-	-	-	Chaperone DnaJ-domain superfamily protein (AHRD V3.3 A0A0F7H181_9ROSI)
Solyc10g039210.4	726.688	1908.22	2.62591	1.39282	0.00508083	0.389366	GO:0005506;GO:0016705;GO:0020037;GO:0055114	-	-	-	-	-	GO:0055114//obsolete oxidation-reduction process;	-	GO:0005506//iron ion binding;GO:0016705//oxidoreductase activity, acting on paired donors, with incorporation or reduction of molecular oxygen;GO:0020037//heme binding;	-	Cytochrome P450 (AHRD V3.3 A0A2U1Q1Z2_ARTAN)
Solyc06g075330.3	6.31838	27.3761	4.33276	2.11529	0.00512581	0.39139	-	-	-	-	-	-	-	-	-	-	LOB domain-containing protein 1 (AHRD V3.3 A0A2G2WK78_CAPBA)
Solyc06g061280.3	1330.98	3916.42	2.9425	1.55704	0.00513738	0.39139	GO:0003824;GO:0050662	-	virNOG01620	V	sp|Q0JKZ0|SNL6_ORYSJ Cinnamoyl-CoA reductase-like SNL6 OS=Oryza sativa subsp. japonica GN=SNL6 PE=3 SV=1	gi|460392712|ref|XP_004241958.1| PREDICTED: dihydroflavonol-4-reductase-like [Solanum lycopersicum]	-	-	GO:0003824//catalytic activity;GO:0050662//obsolete coenzyme binding;	-	NAD(P)-binding Rossmann-fold superfamily protein (AHRD V3.3 A0A2U1LGD5_ARTAN)
Solyc06g009987.1	9.02901	33.912	3.75589	1.90916	0.00517802	0.392696	-	-	-	-	-	-	-	-	-	-	Unknown protein
Solyc12g017240.2	66.8642	148.463	2.22037	1.1508	0.00518475	0.392696	GO:0004553;GO:0005975	K14504	NOG129657;COG2273;virNOG07037	SRG	sp|Q38911|XTH15_ARATH Xyloglucan endotransglucosylase/hydrolase protein 15 OS=Arabidopsis thaliana GN=XTH15 PE=1 SV=1	gi|936976332|ref|NP_001234213.2| xyloglucan endo-transglycosylase precursor [Solanum lycopersicum]	GO:0005975//carbohydrate metabolic process;	-	GO:0004553//hydrolase activity, hydrolyzing O-glycosyl compounds;	ko04075(Plant hormone signal transduction)	xyloglucan endo-transglycosylase B1
Solyc04g050930.3	48.6847	132.024	2.71182	1.43926	0.00522709	0.394751	GO:0009507;GO:0046422;GO:0055114	K09839	virNOG05583	H	sp|Q40593|VDE_TOBAC Violaxanthin de-epoxidase, chloroplastic OS=Nicotiana tabacum GN=VDE1 PE=2 SV=1	gi|806776481|ref|NP_001234610.2| violaxanthin de-epoxidase [Solanum lycopersicum] gi|223587500|gb|ACM92036.1| violaxanthin de-epoxidase [Solanum lycopersicum]	GO:0055114//obsolete oxidation-reduction process;	GO:0009507//chloroplast;	GO:0046422//violaxanthin de-epoxidase activity;	ko00906(Carotenoid biosynthesis)	violaxanthin de-epoxidase
Solyc02g092970.3	32.17	82.8906	2.57664	1.36549	0.00537911	0.402213	GO:0005525	K07937	virNOG33067;NOG00372	RU	sp|P0DH91|ARF2B_ARATH ADP-ribosylation factor 2-B OS=Arabidopsis thaliana GN=ARF2-B PE=2 SV=1	gi|460372118|ref|XP_004231879.1| PREDICTED: ADP-ribosylation factor 2-B-like [Solanum lycopersicum]	-	-	GO:0005525//GTP binding;	ko04144(Endocytosis)	ADP-ribosylation factor (AHRD V3.3 A0A2U1LV56_ARTAN)
Solyc10g085360.3	47.1021	102.457	2.17522	1.12116	0.00542539	0.402213	-	K01193	-	-	-	-	-	-	-	ko00500(Starch and sucrose metabolism);ko00052(Galactose metabolism)	Beta-fructofuranosidase, insoluble isoenzyme 1 (AHRD V3.3 A0A2G3BFL0_CAPCH)
Solyc08g066850.3	62.9909	137.549	2.18364	1.12673	0.00543426	0.402213	-	K01759	virNOG08140;virNOG03443;COG0346	GE	sp|Q8W593|LGUC_ARATH Probable lactoylglutathione lyase, chloroplastic OS=Arabidopsis thaliana GN=At1g67280 PE=1 SV=1	gi|460399305|ref|XP_004245182.1| PREDICTED: putative lactoylglutathione lyase isoform X4 [Solanum lycopersicum] gi|723722769|ref|XP_010325106.1| PREDICTED: putative lactoylglutathione lyase isoform X3 [Solanum lycopersicum]	-	-	-	ko00620(Pyruvate metabolism)	Lactoylglutathione lyase (AHRD V3.3 A0A1U8DS55_CAPAN)
Solyc11g012220.1	20.7851	57.2917	2.75638	1.46277	0.00549013	0.405194	-	-	virNOG12669	S	sp|Q9FJ76|WAXS5_ARATH Probable long-chain-alcohol O-fatty-acyltransferase 5 OS=Arabidopsis thaliana GN=AT5 PE=2 SV=1	gi|970060990|ref|XP_015057270.1| PREDICTED: acyl-CoA--sterol O-acyltransferase 1-like [Solanum pennellii]	-	-	-	-	MBOAT (Membrane bound O-acyl transferase) family protein (AHRD V3.3 A0A2U1LYZ9_ARTAN)
Solyc07g009050.3	83.5953	266.365	3.18636	1.67191	0.00555975	0.406864	-	-	-	-	-	gi|971576065|ref|XP_015170883.1| PREDICTED: defensin D1-like isoform X1 [Solanum tuberosum]	-	-	-	-	defensin-like protein 19 (AHRD V3.3 A0A1S4AH79_TOBAC)
Solyc09g082080.1	23.0912	63.6081	2.75464	1.46186	0.00583081	0.423124	-	-	virNOG21175	S	sp|F4I8R6|OFP12_ARATH Transcription repressor OFP12 OS=Arabidopsis thaliana GN=OFP12 PE=1 SV=1	gi|460404381|ref|XP_004247661.1| PREDICTED: transcription repressor OFP12-like [Solanum lycopersicum]	-	-	-	-	ovate family protein 19
Solyc02g089700.4	613.965	1311.62	2.13631	1.09512	0.00585553	0.423735	-	-	-	-	-	-	-	-	-	-	Protein trichome birefringence-like 19 (AHRD V3.3 A0A1U8FI69_CAPAN)
Solyc10g076410.1	232.743	487.627	2.09513	1.06704	0.00589117	0.423952	-	K14496	virNOG05648;virNOG33745	TR	sp|O80920|PYL4_ARATH Abscisic acid receptor PYL4 OS=Arabidopsis thaliana GN=PYL4 PE=1 SV=1	gi|460407246|ref|XP_004249065.1| PREDICTED: abscisic acid receptor PYL4-like [Solanum lycopersicum]	-	-	-	ko04075(Plant hormone signal transduction);ko04016(MAPK signaling pathway - plant)	Abscisic acid receptor PYL6 (AHRD V3.3 A0A2G3BE77_CAPCH)
Solyc04g150104.1	28703.9	61516.6	2.14315	1.09973	0.00592106	0.424926	-	-	-	-	-	-	-	-	-	-	Kirola (AHRD V3.3 A0A2G2WRW0_CAPBA)
Solyc09g015245.1	4.09284	22.2599	5.43875	2.44327	0.00623686	0.443911	-	-	-	-	-	-	-	-	-	-	Unknown protein
Solyc02g087400.1	115.186	246.148	2.13696	1.09556	0.00630194	0.447317	-	K12271	virNOG08965	R	sp|O22265|SR43C_ARATH Signal recognition particle 43 kDa protein, chloroplastic OS=Arabidopsis thaliana GN=CAO PE=1 SV=2	gi|723671554|ref|XP_010316268.1| PREDICTED: signal recognition particle 43 kDa protein, chloroplastic [Solanum lycopersicum]	-	-	-	-	Ankyrin repeat-containing protein (AHRD V3.3 A0A2U1KW09_ARTAN)
Solyc11g010400.3	1058.85	2225.44	2.10176	1.0716	0.00634305	0.447788	GO:0016491;GO:0055114	-	-	-	-	-	GO:0055114//obsolete oxidation-reduction process;	-	GO:0016491//oxidoreductase activity;	-	2-oxoglutarate (2OG) and Fe(II)-dependent oxygenase superfamily protein (AHRD V3.3 A0A2U1QGX7_ARTAN)
Solyc09g008860.4	361.08	775.274	2.1471	1.10239	0.0064794	0.452495	GO:0004672;GO:0006468	-	-	-	-	-	GO:0006468//protein phosphorylation;	-	GO:0004672//protein kinase activity;	-	leucine-rich repeat receptor-like protein kinase PXC1 (AHRD V3.3 A0A1S4B9J1_TOBAC)
Solyc06g065490.3	15.422	47.1163	3.05513	1.61123	0.00661841	0.458506	GO:0005509;GO:0009523;GO:0009654;GO:0015979;GO:0019898	-	virNOG00820	R	sp|Q9LXX5|PPD6_ARATH PsbP domain-containing protein 6, chloroplastic OS=Arabidopsis thaliana GN=PPD6 PE=1 SV=1	gi|460392422|ref|XP_004241815.1| PREDICTED: psbP domain-containing protein 6, chloroplastic [Solanum lycopersicum]	GO:0015979//photosynthesis;	GO:0009523//photosystem II;GO:0009654//photosystem II oxygen evolving complex;GO:0019898//extrinsic component of membrane;	GO:0005509//calcium ion binding;	-	Photosystem II reaction center PsbP family protein (AHRD V3.3 A0A0F7CYM1_9ROSI)
Solyc05g014590.3	33.7395	84.7505	2.51191	1.32878	0.00678956	0.465398	GO:0046983	-	virNOG16250	K	sp|Q2HIV9|BH035_ARATH Transcription factor bHLH35 OS=Arabidopsis thaliana GN=BHLH35 PE=2 SV=1	gi|460387015|ref|XP_004239187.1| PREDICTED: transcription factor bHLH35 isoform X1 [Solanum lycopersicum]	-	-	GO:0046983//protein dimerization activity;	-	Basic helix-loop-helix (BHLH) DNA-binding superfamily protein (AHRD V3.3 A0A2U1MR86_ARTAN)
Solyc10g079040.3	37.211	84.6732	2.27549	1.18617	0.00680765	0.465411	-	-	-	-	-	-	-	-	-	-	Squalene synthase (AHRD V3.3 A0A2G3BHX4_CAPCH),Pfam:PF00494
Solyc01g080100.3	79.8817	163.81	2.05065	1.03608	0.00687015	0.467224	-	-	virNOG20570	O	-	gi|460367154|ref|XP_004229440.1| PREDICTED: uncharacterized protein LOC101257299 [Solanum lycopersicum]	-	-	-	-	RING zinc finger protein (AHRD V3.3 AT3G06145.1)
Solyc05g007090.4	16.2411	48.6625	2.99627	1.58317	0.0070097	0.475422	GO:0003676;GO:0008270	-	-	-	-	-	-	-	GO:0003676//nucleic acid binding;GO:0008270//zinc ion binding;	-	Zinc knuckle (CCHC-type) family protein (AHRD V3.3 A0A1P8BB42_ARATH)
Solyc10g085850.1	67.0315	150.459	2.2446	1.16646	0.00703655	0.475422	-	-	-	-	-	gi|1009718|gb|AAA91132.1| TPSI1 [Solanum lycopersicum] gi|1771182|emb|CAA67602.1| TPSI1 [Solanum lycopersicum]	-	-	-	-	TPSI1 protein (AHRD V3.3 Q41336_SOLLC)
Solyc09g064500.3	36.6501	92.1794	2.51512	1.33063	0.00708287	0.475422	GO:0009523;GO:0009654;GO:0015979;GO:0016020	K08903	virNOG18914	R	sp|Q0JG75|PSB28_ORYSJ Photosystem II reaction center PSB28 protein, chloroplastic OS=Oryza sativa subsp. japonica GN=PSB28 PE=2 SV=2	gi|460403300|ref|XP_004247130.1| PREDICTED: photosystem II reaction center Psb28 protein [Solanum lycopersicum]	GO:0015979//photosynthesis;	GO:0009523//photosystem II;GO:0009654//photosystem II oxygen evolving complex;GO:0016020//membrane;	-	ko00195(Photosynthesis)	Photosystem II reaction center Psb28 protein (AHRD V3.3 A0A1U8EF03_CAPAN)
Solyc10g083300.2	2720.41	6600.83	2.42641	1.27882	0.00709863	0.475422	-	K01193	virNOG05903	G	sp|P26792|INV1_DAUCA Beta-fructofuranosidase, insoluble isoenzyme 1 OS=Daucus carota GN=INV1 PE=1 SV=1	gi|1024846624|ref|NP_001311325.1| invertase 8 [Solanum lycopersicum]	-	-	-	ko00500(Starch and sucrose metabolism);ko00052(Galactose metabolism)	invertase 8
Solyc09g014230.2	3.51662	20.8853	5.93903	2.57023	0.00714001	0.475422	GO:0016020;GO:0022857;GO:0055085	K14638	virNOG02212	E	sp|Q9M390|PTR1_ARATH Protein NRT1/ PTR FAMILY 8.1 OS=Arabidopsis thaliana GN=NPF8.1 PE=1 SV=1	gi|723729036|ref|XP_010326140.1| PREDICTED: uncharacterized protein LOC101268606 [Solanum lycopersicum]	GO:0055085//transmembrane transport;	GO:0016020//membrane;	GO:0022857//transmembrane transporter activity;	-	Major facilitator superfamily protein (AHRD V3.3 A0A1P8AP16_ARATH)
Solyc08g005890.3	204.049	443.541	2.1737	1.12015	0.00714084	0.475422	GO:0016747	-	virNOG00084	S	sp|Q9FH97|EPS1_ARATH Protein ENHANCED PSEUDOMONAS SUSCEPTIBILTY 1 OS=Arabidopsis thaliana GN=EPS1 PE=2 SV=1	gi|723719461|ref|XP_004244447.2| PREDICTED: uncharacterized acetyltransferase At3g50280-like [Solanum lycopersicum]	-	-	GO:0016747//acyltransferase activity, transferring groups other than amino-acyl groups;	-	HXXXD-type acyl-transferase family protein (AHRD V3.3 A0A2K3L8P7_TRIPR)
Solyc08g008660.4	32.0652	77.6814	2.4226	1.27656	0.00725575	0.478419	GO:0003677;GO:0006355	-	-	-	-	-	GO:0006355//regulation of transcription, DNA-templated;	-	GO:0003677//DNA binding;	-	NAC domain-containing protein, putative (AHRD V3.3 A0A061G3T7_THECC)
Solyc06g074910.3	67.7584	172.782	2.54997	1.35048	0.00727664	0.478582	-	K09422	COG5147;virNOG07491;virNOG29818	K	sp|Q9FKL2|MYB36_ARATH Transcription factor MYB36 OS=Arabidopsis thaliana GN=MYB36 PE=1 SV=1	gi|460393003|ref|XP_004242101.1| PREDICTED: transcription factor RAX1-like [Solanum lycopersicum]	-	-	-	-	potato leaf
Solyc02g084740.4	880.406	1880.51	2.13596	1.09489	0.00744874	0.48499	GO:0005506;GO:0016705;GO:0020037;GO:0055114	K12637	-	-	-	-	GO:0055114//obsolete oxidation-reduction process;	-	GO:0005506//iron ion binding;GO:0016705//oxidoreductase activity, acting on paired donors, with incorporation or reduction of molecular oxygen;GO:0020037//heme binding;	ko00905(Brassinosteroid biosynthesis)	Cytochrome P450 (AHRD V3.3 A0A200QE89_9MAGN)
Solyc01g081610.3	64.0113	129.765	2.02722	1.0195	0.00759548	0.48711	GO:0004553;GO:0005975	K12373	virNOG08798	G	sp|Q9SYK0|HEXO2_ARATH Beta-hexosaminidase 2 OS=Arabidopsis thaliana GN=HEXO2 PE=1 SV=1	gi|350540008|ref|NP_001234608.1| beta-hexosaminidase 1 precursor [Solanum lycopersicum] gi|166159759|gb|ABY83272.1| beta-hexosaminidase 1 [Solanum lycopersicum] gi|166159763|gb|ABY83274.1| beta-hexosaminidase 1 [Solanum lycopersicum]	GO:0005975//carbohydrate metabolic process;	-	GO:0004553//hydrolase activity, hydrolyzing O-glycosyl compounds;	ko00604(Glycosphingolipid biosynthesis - ganglio series);ko00603(Glycosphingolipid biosynthesis - globo and isoglobo series);ko00531(Glycosaminoglycan degradation);ko00520(Amino sugar and nucleotide sugar metabolism);ko00513(Various types of N-glycan biosynthesis);ko00511(Other glycan degradation)	Beta-hexosaminidase (AHRD V3.3 A0A2G2XRM6_CAPBA)
Solyc04g028460.1	8.02637	30.6878	3.82337	1.93484	0.00764549	0.48711	-	-	virNOG21819	S	-	gi|723691545|ref|XP_010319613.1| PREDICTED: uncharacterized protein LOC104646853 [Solanum lycopersicum]	-	-	-	-	DNA ligase-like protein%2C putative (DUF1645) (AHRD V3.3 AT1G70420.1)
Solyc03g006240.3	385.431	844.797	2.19182	1.13213	0.0076556	0.48711	GO:0016788	-	virNOG01964	R	sp|Q9FJ45|GDL83_ARATH GDSL esterase/lipase At5g45910 OS=Arabidopsis thaliana GN=At5g45910 PE=2 SV=1	gi|460376620|ref|XP_004234095.1| PREDICTED: GDSL esterase/lipase At5g45910 [Solanum lycopersicum]	-	-	GO:0016788//hydrolase activity, acting on ester bonds;	-	GDSL esterase/lipase (AHRD V3.3 A0A2G2ZLG9_CAPAN)
Solyc06g051460.4	208.225	471.878	2.26619	1.18027	0.00767405	0.48711	GO:0005524	-	-	-	-	-	-	-	GO:0005524//ATP binding;	-	Double Clp-N motif-containing P-loop nucleoside triphosphate hydrolases superfamily protein (AHRD V3.3 A0A2U1M3E7_ARTAN)
Solyc09g092400.2	19.4799	53.1193	2.72687	1.44725	0.00768756	0.48711	GO:0016787	K14641	virNOG01880;COG5371	FOG	sp|P80595|APY_SOLTU Apyrase OS=Solanum tuberosum GN=RROP1 PE=1 SV=2	gi|460405002|ref|XP_004247967.1| PREDICTED: apyrase-like [Solanum lycopersicum]	-	-	GO:0016787//hydrolase activity;	ko00240(Pyrimidine metabolism);ko00230(Purine metabolism)	Apyrase (AHRD V3.3 A0A2G2W266_CAPBA)
Solyc02g063150.3	56.0774	153.609	2.73922	1.45377	0.00793649	0.49923	-	K01602	virNOG17005	G	sp|P08706|RBS1_SOLLC Ribulose bisphosphate carboxylase small chain 1, chloroplastic OS=Solanum lycopersicum GN=RBCS-1 PE=2 SV=2	gi|822092500|ref|NP_001295872.1| ribulose bisphosphate carboxylase small chain 1, chloroplastic [Solanum lycopersicum] gi|132079|sp|P08706.2|RBS1_SOLLC RecName: Full=Ribulose bisphosphate carboxylase small chain 1, chloroplastic; Short=RuBisCO small subunit 1; AltName: Full=LESS 17; Flags: Precursor gi|170496|gb|AAA34188.1| ribulose-1,5-bisphophate carboxylase/ oxygenase small subunit [Solanum ly…	-	-	-	ko00710(Carbon fixation in photosynthetic organisms);ko00630(Glyoxylate and dicarboxylate metabolism)	RuBP carboxylase small subunit
Solyc04g014730.4	287.956	642.201	2.23021	1.15718	0.00799068	0.501376	GO:0003824	K01555	-	-	-	-	-	-	GO:0003824//catalytic activity;	ko00350(Tyrosine metabolism)	Fumarylacetoacetase (AHRD V3.3 A0A1U8GL68_CAPAN)
Solyc09g010120.2	17.9579	50.056	2.78741	1.47893	0.00819215	0.507933	-	-	virNOG17028	S	-	gi|460401970|ref|XP_004246488.1| PREDICTED: uncharacterized protein LOC101246952 [Solanum lycopersicum]	-	-	-	-	hypothetical protein (AHRD V3.3 AT2G36145.1)
Solyc10g087015.1	188.63	383.818	2.03477	1.02486	0.0084037	0.515984	GO:0005506;GO:0016705;GO:0020037;GO:0055114	-	-	-	-	-	GO:0055114//obsolete oxidation-reduction process;	-	GO:0005506//iron ion binding;GO:0016705//oxidoreductase activity, acting on paired donors, with incorporation or reduction of molecular oxygen;GO:0020037//heme binding;	-	Cytochrome (AHRD V3.3 A0A1U8F0H8_CAPAN)
Solyc02g065530.4	41.5135	103.501	2.49319	1.31799	0.00842131	0.515984	GO:0016757	K20893	-	-	-	-	-	-	GO:0016757//glycosyltransferase activity;	-	Hexosyltransferase (AHRD V3.3 A0A2G2XBK6_CAPBA)
Solyc07g049290.3	41.696	100.736	2.41596	1.2726	0.00872802	0.526091	GO:0016020;GO:0022857;GO:0055085	-	virNOG05537	P	sp|Q9LVE0|PTR33_ARATH Protein NRT1/ PTR FAMILY 6.4 OS=Arabidopsis thaliana GN=NPF6.4 PE=1 SV=1	gi|874507335|ref|NP_001297145.1| protein NRT1/ PTR FAMILY 6.4 [Solanum lycopersicum]	GO:0055085//transmembrane transport;	GO:0016020//membrane;	GO:0022857//transmembrane transporter activity;	-	Protein NRT1/ PTR FAMILY 6.4 (AHRD V3.3 A0A2G2Z2Y2_CAPAN)
Solyc12g009600.2	3.96373	20.2888	5.11861	2.35575	0.00919742	0.546032	-	-	virNOG02949	S	sp|O22773|TL16_ARATH Thylakoid lumenal 16.5 kDa protein, chloroplastic OS=Arabidopsis thaliana GN=At4g02530 PE=1 SV=3	gi|460412677|ref|XP_004251724.1| PREDICTED: thylakoid lumenal 16.5 kDa protein, chloroplastic [Solanum lycopersicum]	-	-	-	-	Thylakoid lumenal 16.5 kDa protein, chloroplastic (AHRD V3.3 A0A2G2YVM2_CAPAN)
Solyc03g111700.3	38.4705	85.0377	2.21046	1.14435	0.00920598	0.546032	-	-	virNOG10449	S	-	gi|460381123|ref|XP_004236302.1| PREDICTED: uncharacterized protein LOC101254186 isoform X1 [Solanum lycopersicum]	-	-	-	-	Metallo-hydrolase/oxidoreductase superfamily protein (AHRD V3.3 A0A2U1M7M5_ARTAN),Pfam:PF13483
Solyc02g072570.2	24.4107	59.321	2.43012	1.28103	0.00941855	0.553113	GO:0006351;GO:0043565	-	virNOG22284;virNOG22224	S	sp|Q58FV0|DOGL3_ARATH Protein DOG1-like 3 OS=Arabidopsis thaliana GN=DOGL3 PE=2 SV=1	gi|723678260|ref|XP_010317335.1| PREDICTED: transcription factor HBP-1b(c38)-like [Solanum lycopersicum]	GO:0006351//transcription, DNA-templated;	-	GO:0043565//sequence-specific DNA binding;	-	Transcription factor TGA like domain (AHRD V3.3 A0A200Q9U0_9MAGN)
Solyc07g051990.2	1.72039	13.9546	8.1113	3.01993	0.00947558	0.554428	-	-	virNOG02024	T	sp|F4JTN2|LAZ1_ARATH Protein LAZ1 OS=Arabidopsis thaliana GN=LAZ1 PE=1 SV=1	gi|970038062|ref|XP_015080367.1| PREDICTED: protein LAZ1 [Solanum pennellii]	-	-	-	-	protein LAZ1-like isoform X1 (AHRD V3.3 A0A1U8FGQ5_CAPAN)
Solyc02g055440.4	8.57715	31.081	3.6237	1.85746	0.00949761	0.554468	-	-	-	-	-	-	-	-	-	-	E3 ubiquitin-protein ligase%2C putative (DUF177) (AHRD V3.3 AT3G19800.2)
Solyc02g065520.1	129.545	282.541	2.18103	1.12501	0.00956319	0.555799	GO:0004672;GO:0006468	-	virNOG02678	T	sp|Q0GXS4|NFP_MEDTR Serine/threonine receptor-like kinase NFP OS=Medicago truncatula GN=NFP PE=1 SV=1	gi|350539565|ref|NP_001233936.1| Lyk10 precursor [Solanum lycopersicum] gi|345843154|gb|AEO18233.1| Lyk10 [Solanum lycopersicum]	GO:0006468//protein phosphorylation;	-	GO:0004672//protein kinase activity;	-	Lyk10 (AHRD V3.3 G3KGB1_SOLLC)
Solyc07g061790.3	165.629	468.281	2.8273	1.49942	0.00990767	0.571981	-	-	virNOG04775	R	sp|Q9Y5Z4|HEBP2_HUMAN Heme-binding protein 2 OS=Homo sapiens GN=HEBP2 PE=1 SV=1	gi|460397526|ref|XP_004244318.1| PREDICTED: heme-binding protein 2 [Solanum lycopersicum]	-	-	-	-	Heme-binding protein 2-like (AHRD V3.3 A0A2K3NGA7_TRIPR)
Solyc08g076980.4	6.6092	26.5815	4.02189	2.00787	0.0100933	0.578836	GO:0016787	K01438	-	-	-	-	-	-	GO:0016787//hydrolase activity;	ko00220(Arginine biosynthesis)	Acetylornithine deacetylase (AHRD V3.3 A0A2G3DCH5_CAPCH)
Solyc06g035710.1	48.9842	99.4319	2.02988	1.02139	0.0103211	0.584799	GO:0006855;GO:0015238;GO:0015297;GO:0016020;GO:0055085	K03327	virNOG01269	S	sp|O82752|DTX49_ARATH Protein DETOXIFICATION 49 OS=Arabidopsis thaliana GN=DTX49 PE=2 SV=1	gi|460390344|ref|XP_004240795.1| PREDICTED: MATE efflux family protein 5-like [Solanum lycopersicum]	GO:0006855//xenobiotic transmembrane transport;GO:0055085//transmembrane transport;	GO:0016020//membrane;	GO:0015297//antiporter activity;	-	Protein DETOXIFICATION (AHRD V3.3 A0A1Q3CGT0_CEPFO)
Solyc01g096250.2	50.7752	106.541	2.0983	1.06922	0.010506	0.588595	-	-	virNOG25617;NOG173387	S	-	gi|460368310|ref|XP_004230010.1| PREDICTED: putative uncharacterized protein DDB_G0290521 [Solanum lycopersicum]	-	-	-	-	proline-rich receptor-like protein kinase PERK2 (AHRD V3.3 A0A2I4GSB7_9ROSI)
Solyc07g063720.1	13.9154	41.5336	2.98471	1.57759	0.0105277	0.588595	GO:0004672;GO:0005524;GO:0006468	-	virNOG02323;COG0515	T	sp|O81832|Y4729_ARATH G-type lectin S-receptor-like serine/threonine-protein kinase At4g27290 OS=Arabidopsis thaliana GN=At4g27290 PE=3 SV=4	gi|723719112|ref|XP_010324436.1| PREDICTED: uncharacterized protein LOC101244686 [Solanum lycopersicum]	GO:0006468//protein phosphorylation;	-	GO:0004672//protein kinase activity;GO:0005524//ATP binding;	-	G-type lectin S-receptor-like serine/threonine-protein kinase (AHRD V3.3 A0A2G3C305_CAPCH)
Solyc06g076060.1	6.06317	25.1178	4.14268	2.05056	0.0105619	0.588816	-	-	virNOG26758	S	-	gi|697098598|ref|XP_009627510.1| PREDICTED: uncharacterized protein LOC104118042 [Nicotiana tomentosiformis]	-	-	-	-	cyclin-dependent protein kinase inhibitor SMR3-like (AHRD V3.3 A0A2I4FWF9_9ROSI)
Solyc05g052040.1	2035.47	4127.51	2.0278	1.01991	0.0106213	0.589779	GO:0003700;GO:0006355	K09286	virNOG21829;virNOG21432	SK	sp|Q40478|ERF5_TOBAC Ethylene-responsive transcription factor 5 OS=Nicotiana tabacum GN=ERF5 PE=2 SV=1	gi|985567513|ref|NP_001306589.1| ethylene-responsive transcription factor 5 [Solanum lycopersicum]	GO:0006355//regulation of transcription, DNA-templated;	-	GO:0003700//DNA-binding transcription factor activity;	-	ripening regulated protein DDTFR10/A
Solyc12g098270.1	3.0008	17.2063	5.7339	2.51952	0.0111689	0.610859	-	-	-	-	-	gi|1026004382|ref|XP_016554018.1| PREDICTED: glycine-rich cell wall structural protein-like [Capsicum annuum]	-	-	-	-	acanthoscurrin-1-like (AHRD V3.3 XP_010314853.1)
Solyc01g097770.4	13.6122	40.8917	3.00404	1.5869	0.0112306	0.611692	GO:0004672;GO:0005524;GO:0006468	K20715	-	-	-	-	GO:0006468//protein phosphorylation;	-	GO:0004672//protein kinase activity;GO:0005524//ATP binding;	-	phototropin 2
Solyc08g061630.3	103.055	238.158	2.31098	1.20851	0.0113429	0.61549	GO:0016020	K02221	virNOG06772	S	sp|Q9C595|YLMG2_ARATH YlmG homolog protein 2, chloroplastic OS=Arabidopsis thaliana GN=YLMG2 PE=2 SV=1	gi|460399027|ref|XP_004245046.1| PREDICTED: uncharacterized protein LOC101267629 [Solanum lycopersicum]	-	GO:0016020//membrane;	-	-	YGGT family protein (AHRD V3.3 F8WLD3_CITUN)
Solyc01g108210.4	49.4871	118.945	2.40355	1.26517	0.0113958	0.61549	GO:0005506;GO:0016705;GO:0020037;GO:0055114	K09843	-	-	-	-	GO:0055114//obsolete oxidation-reduction process;	-	GO:0005506//iron ion binding;GO:0016705//oxidoreductase activity, acting on paired donors, with incorporation or reduction of molecular oxygen;GO:0020037//heme binding;	ko00906(Carotenoid biosynthesis)	Cytochrome P450 (AHRD V3.3 A0A200QZB6_9MAGN)
Solyc01g105720.2	2753.09	5865.67	2.13057	1.09124	0.011587	0.620658	-	-	virNOG15309	S	-	gi|460369510|ref|XP_004230605.1| PREDICTED: uncharacterized protein LOC101261168 [Solanum lycopersicum]	-	-	-	-	hypothetical protein (AHRD V3.3 AT1G58120.1)
Solyc04g008570.4	19.0452	49.1748	2.582	1.36849	0.0116142	0.620832	-	-	-	-	-	-	-	-	-	-	Pentatricopeptide repeat-containing protein, chloroplastic (AHRD V3.3 A0A2G3CF28_CAPCH)
Solyc05g024190.3	19.4703	49.2156	2.52772	1.33784	0.0117723	0.625424	-	-	-	-	-	-	-	-	-	-	Chlorophyll synthase, chloroplastic (AHRD V3.3 A0A2G2YSE5_CAPAN)
Solyc12g049190.3	44.6304	102.664	2.30031	1.20183	0.0119684	0.632384	GO:0005515	-	-	-	-	-	-	-	GO:0005515//protein binding;	-	Hcr2-0B (AHRD V3.3 Q9ZTJ9_SOLLC)
Solyc09g091140.4	138.891	290.268	2.0899	1.06343	0.0120546	0.632661	GO:0005515	K00799	-	-	-	-	-	-	GO:0005515//protein binding;	ko00480(Glutathione metabolism)	Glutathione S-transferase (AHRD V3.3 A0A200PVL1_9MAGN)
Solyc12g150101.1	8.47348	29.0468	3.42796	1.77735	0.0124497	0.649404	-	-	-	-	-	-	-	-	-	-	Photosystem II reaction center X protein (AHRD V3.3 A0A2G2X3Z0_CAPBA)
Solyc08g081520.1	22.637	56.1121	2.47878	1.30963	0.0124986	0.649404	-	-	virNOG11776	S	-	gi|460400089|ref|XP_004245568.1| PREDICTED: uncharacterized protein LOC101246948 [Solanum lycopersicum]	-	-	-	-	Plant/F1M20-13 protein (AHRD V3.3 A0A072TUL8_MEDTR)
Solyc03g121170.3	58.9491	133.296	2.2612	1.17709	0.0133383	0.672845	GO:0016788	-	virNOG09015	R	sp|Q9LU14|APG2_ARATH GDSL esterase/lipase APG OS=Arabidopsis thaliana GN=APG PE=2 SV=1	gi|460379769|ref|XP_004235633.1| PREDICTED: GDSL esterase/lipase APG-like [Solanum lycopersicum]	-	-	GO:0016788//hydrolase activity, acting on ester bonds;	-	GDSL esterase/lipase (AHRD V3.3 A0A2G3D0R1_CAPCH)
Solyc10g009590.4	3.30401	17.4349	5.27688	2.39968	0.0136742	0.679461	-	-	-	-	-	-	-	-	-	-	Protein trichome birefringence-like 25 (AHRD V3.3 A0A2G2YK30_CAPAN)
Solyc07g039190.4	46.3898	107.651	2.32058	1.21449	0.0138856	0.680656	-	-	-	-	-	-	-	-	-	-	hypothetical protein (AHRD V3.3 AT5G56850.4)
Solyc06g066830.4	3258.73	7197.09	2.20855	1.1431	0.0139432	0.680656	GO:0016491;GO:0055114	-	-	-	-	-	GO:0055114//obsolete oxidation-reduction process;	-	GO:0016491//oxidoreductase activity;	-	2-oxoglutarate (2OG) and Fe(II)-dependent oxygenase superfamily protein (AHRD V3.3 A0A2U1LXD5_ARTAN)
Solyc02g082040.3	13.7034	38.9601	2.8431	1.50747	0.0139788	0.680656	-	K09422	virNOG00179	K	sp|Q8VZQ2|MYB61_ARATH Transcription factor MYB61 OS=Arabidopsis thaliana GN=MYB61 PE=2 SV=1	gi|460373618|ref|XP_004232612.1| PREDICTED: transcription factor MYB86-like [Solanum lycopersicum]	-	-	-	-	R2R3MYB transcription factor 56
Solyc06g076790.1	22.354	55.4169	2.47906	1.3098	0.0141008	0.68344	-	-	virNOG24845	S	-	gi|460391130|ref|XP_004241176.1| PREDICTED: uncharacterized protein LOC101259757 [Solanum lycopersicum]	-	-	-	-	Thylakoid soluble phosphoprotein TSP9 (AHRD V3.3 A0A200Q7Q2_9MAGN)
Solyc07g045320.3	19.7292	50.3453	2.55181	1.35152	0.0141416	0.683568	GO:0003682	-	virNOG19920;virNOG19131	S	-	gi|460396035|ref|XP_004243585.1| PREDICTED: uncharacterized protein LOC101263729 [Solanum lycopersicum]	-	-	GO:0003682//chromatin binding;	-	SAWADEE domain-containing protein (AHRD V3.3 A0A2U1MTI3_ARTAN)
Solyc10g051140.3	34.6105	74.9027	2.16416	1.11381	0.014156	0.683568	-	-	-	-	-	-	-	-	-	-	Protein ENHANCED DOWNY MILDEW 2 (AHRD V3.3 A0A2G2YIJ3_CAPAN)
Solyc02g086890.3	47.8449	97.768	2.04344	1.031	0.0143794	0.683702	-	-	virNOG02432	S	sp|Q9M3C6|PSA3C_ARATH Photosystem I assembly factor PSA3, chloroplastic OS=Arabidopsis thaliana GN=PSA3 PE=1 SV=1	gi|460372963|ref|XP_004232292.1| PREDICTED: uncharacterized protein LOC101249783 [Solanum lycopersicum]	-	-	-	-	Calcium homeostasis regulator CHoR1 (AHRD V3.3 Q5QTN8_SOLTU)
Solyc06g052010.2	7.72315	27.6264	3.57709	1.83879	0.0143957	0.683702	GO:0005515	-	virNOG01369	S	sp|Q9SF32|IQD1_ARATH Protein IQ-DOMAIN 1 OS=Arabidopsis thaliana GN=IQD1 PE=1 SV=1	gi|460390687|ref|XP_004240959.1| PREDICTED: protein IQ-DOMAIN 1 isoform X2 [Solanum lycopersicum] gi|723706356|ref|XP_010322220.1| PREDICTED: protein IQ-DOMAIN 1 isoform X2 [Solanum lycopersicum]	-	-	GO:0005515//protein binding;	-	SUN-like protein 16
Solyc12g017880.3	38.9302	82.2697	2.11326	1.07947	0.014422	0.683702	-	-	-	-	-	-	-	-	-	-	Cytochrome b561 and DOMON domain-containing protein (AHRD V3.3 A0A2G3CV22_CAPCH)
Solyc03g114850.4	43.8106	89.1305	2.03445	1.02464	0.0145807	0.686628	-	-	-	-	-	-	-	-	-	-	Squamosa promoter binding protein 6a
Solyc04g009020.4	6.54879	25.4332	3.88365	1.95741	0.0146455	0.688021	-	-	-	-	-	-	-	-	-	-	High chlorophyll fluorescent 107 (AHRD V3.3 F4J3Z3_ARATH)
Solyc03g033290.1	6.29056	23.7265	3.77176	1.91524	0.0154799	0.712751	-	-	virNOG26304	S	-	gi|723680097|ref|XP_010317688.1| PREDICTED: cysteine-rich repeat secretory protein 1-like [Solanum lycopersicum]	-	-	-	-	Tracheary element differentiation-related 6 (AHRD V3.3 C1PGW0_ZINVI)
Solyc08g014380.3	9.13678	33.3959	3.6551	1.86991	0.0157231	0.715254	GO:0016787	K19882	-	-	-	-	-	-	GO:0016787//hydrolase activity;	-	Pectin acetylesterase (AHRD V3.3 K4CJ71_SOLLC)
Solyc04g082630.3	35.5819	82.7444	2.32547	1.21752	0.0159152	0.716093	GO:0016620;GO:0055114	K05298	virNOG04721	G	sp|P12859|G3PB_PEA Glyceraldehyde-3-phosphate dehydrogenase B, chloroplastic OS=Pisum sativum GN=GAPB PE=1 SV=2	gi|971541388|ref|XP_006342156.2| PREDICTED: glyceraldehyde-3-phosphate dehydrogenase B, chloroplastic [Solanum tuberosum]	GO:0055114//obsolete oxidation-reduction process;	-	GO:0016620//oxidoreductase activity, acting on the aldehyde or oxo group of donors, NAD or NADP as acceptor;	ko00710(Carbon fixation in photosynthetic organisms)	Glyceraldehyde-3-phosphate dehydrogenase (AHRD V3.3 A0A2G2X1C8_CAPBA)
Solyc09g005425.1	13.2065	48.5945	3.67958	1.87954	0.0160142	0.716578	GO:0006952	-	-	-	-	-	GO:0006952//defense response;	-	-	-	Kirola (AHRD V3.3 A0A2U1MSQ9_ARTAN)
Solyc05g051270.3	40.8182	85.1775	2.08675	1.06126	0.0160825	0.716578	-	-	virNOG07781;virNOG06927	SR	sp|Q0WPN8|CRR60_ARATH Cysteine-rich repeat secretory protein 60 OS=Arabidopsis thaliana GN=CRRSP60 PE=1 SV=1	gi|460389227|ref|XP_004240260.1| PREDICTED: cysteine-rich repeat secretory protein 60-like [Solanum lycopersicum]	-	-	-	-	Cysteine-rich repeat secretory protein 60 (AHRD V3.3 A0A2G2VDA1_CAPBA)
Solyc08g066650.3	1028.11	2207.73	2.14736	1.10257	0.0160858	0.716578	GO:0016702;GO:0055114	K17913	virNOG06207	Q	sp|Q8LIY8|CCD8B_ORYSJ Carotenoid cleavage dioxygenase 8 homolog B, chloroplastic OS=Oryza sativa subsp. japonica GN=CCD8B PE=1 SV=1	gi|928192545|ref|NP_001266276.2| carotenoid cleavage dioxygenase 8, chloroplastic-like [Solanum lycopersicum]	GO:0055114//obsolete oxidation-reduction process;	-	GO:0016702//oxidoreductase activity, acting on single donors with incorporation of molecular oxygen, incorporation of two atoms of oxygen;	ko00906(Carotenoid biosynthesis)	Carotenoid Cleavage Dioxygenase 8
Solyc06g063040.1	38.2562	80.1979	2.09633	1.06787	0.0161845	0.716578	GO:0055114	K19825	virNOG06682	R	sp|Q9SLN8|DBR_TOBAC 2-alkenal reductase (NADP(+)-dependent) OS=Nicotiana tabacum GN=DBR PE=1 SV=1	gi|460392585|ref|XP_004241896.1| PREDICTED: 2-alkenal reductase (NADP(+)-dependent) [Solanum lycopersicum]	GO:0055114//obsolete oxidation-reduction process;	-	-	-	2-alkenal reductase (NADP(+)-dependent) (AHRD V3.3 A0A1U8H4Y5_CAPAN)
Solyc07g066330.3	314.914	642.33	2.0397	1.02836	0.0164126	0.719408	GO:0003677;GO:0006355	-	virNOG04196	K	sp|Q84TE6|NAC22_ARATH NAC domain-containing protein 21/22 OS=Arabidopsis thaliana GN=NAC021 PE=1 SV=2	gi|460396870|ref|XP_004243993.1| PREDICTED: NAC domain-containing protein 21/22 [Solanum lycopersicum]	GO:0006355//regulation of transcription, DNA-templated;	-	GO:0003677//DNA binding;	-	NAC domain-containing protein (AHRD V3.3 A0A2G2WGF8_CAPBA)
Solyc02g020940.3	2.97059	16.1516	5.43716	2.44285	0.0164767	0.719408	GO:0016620;GO:0055114	K05298	virNOG04721	G	sp|P09043|G3PA_TOBAC Glyceraldehyde-3-phosphate dehydrogenase A, chloroplastic (Fragment) OS=Nicotiana tabacum GN=GAPA PE=2 SV=1	gi|460371392|ref|XP_004231523.1| PREDICTED: glyceraldehyde-3-phosphate dehydrogenase A, chloroplastic-like [Solanum lycopersicum]	GO:0055114//obsolete oxidation-reduction process;	-	GO:0016620//oxidoreductase activity, acting on the aldehyde or oxo group of donors, NAD or NADP as acceptor;	ko00710(Carbon fixation in photosynthetic organisms)	Glyceraldehyde-3-phosphate dehydrogenase (AHRD V3.3 A0A2G3D2C2_CAPCH)
Solyc12g008380.1	37.7494	81.0125	2.14606	1.10169	0.0167055	0.72332	-	-	virNOG19883;virNOG10010;virNOG24195	S	-	gi|460412486|ref|XP_004251629.1| PREDICTED: uncharacterized protein LOC101257239 [Solanum lycopersicum]	-	-	-	-	Avr9/Cf-9 rapidly elicited protein (AHRD V3.3 Q9ZU12_ARATH)
Solyc04g074880.2	498.492	1191.05	2.38931	1.2566	0.0168332	0.725759	-	-	virNOG10208	G	sp|Q9FZ95|PUP3_ARATH Purine permease 3 OS=Arabidopsis thaliana GN=PUP3 PE=2 SV=1	gi|460384527|ref|XP_004237962.1| PREDICTED: purine permease 3-like [Solanum lycopersicum]	-	-	-	-	purine permease 3-like (AHRD V3.3 A0A2G2ZQS5_CAPAN),Pfam:PF16913
Solyc07g017950.3	16.8232	44.7143	2.65789	1.41028	0.017103	0.730342	-	K01602	virNOG18342	G	sp|O22572|RBS2_FRIAG Ribulose bisphosphate carboxylase small chain 2, chloroplastic OS=Fritillaria agrestis GN=RBCS2 PE=2 SV=1	gi|460395003|ref|XP_004243079.1| PREDICTED: ribulose bisphosphate carboxylase small chain clone 512-like [Solanum lycopersicum]	-	-	-	ko00710(Carbon fixation in photosynthetic organisms);ko00630(Glyoxylate and dicarboxylate metabolism)	Ribulose bisphosphate carboxylase small chain (AHRD V3.3 A0A1Q3CZK4_CEPFO)
Solyc05g051157.1	1.08375	10.518	9.7052	3.27876	0.0171482	0.730342	-	-	-	-	-	-	-	-	-	-	Lysine-specific histone demethylase 1 like 1 (AHRD V3.3 A0A2I0XG51_9ASPA)
Solyc02g030480.4	368.085	839.623	2.28106	1.1897	0.0172407	0.730664	GO:0055114	K00083	-	-	-	-	GO:0055114//obsolete oxidation-reduction process;	-	-	ko00940(Phenylpropanoid biosynthesis)	Alcohol dehydrogenase superfamily (AHRD V3.3 A0A200Q008_9MAGN)
Solyc06g065340.1	366.117	793.559	2.1675	1.11603	0.0175308	0.734567	-	-	virNOG24540	S	-	gi|460392449|ref|XP_004241828.1| PREDICTED: uncharacterized protein LOC101251995 [Solanum lycopersicum]	-	-	-	-	hypothetical protein (AHRD V3.3 AT1G22680.1)
Solyc07g063810.2	1.27328	11.5157	9.04416	3.17699	0.0179993	0.748918	GO:0004672;GO:0005524;GO:0006468	-	virNOG31264;COG0515	T	sp|O81832|Y4729_ARATH G-type lectin S-receptor-like serine/threonine-protein kinase At4g27290 OS=Arabidopsis thaliana GN=At4g27290 PE=3 SV=4	gi|147797276|emb|CAN73738.1| hypothetical protein VITISV_036172 [Vitis vinifera]	GO:0006468//protein phosphorylation;	-	GO:0004672//protein kinase activity;GO:0005524//ATP binding;	-	G-type lectin S-receptor-like serine/threonine-protein kinase (AHRD V3.3 A0A2G3C314_CAPCH)
Solyc11g005430.2	34.4388	72.8533	2.11544	1.08096	0.018594	0.759175	GO:0016020;GO:0016021	-	virNOG05763	S	sp|Q9FGG3|WTR45_ARATH WAT1-related protein At5g64700 OS=Arabidopsis thaliana GN=At5g64700 PE=2 SV=1	gi|723743039|ref|XP_010312886.1| PREDICTED: WAT1-related protein At5g64700-like [Solanum lycopersicum]	-	GO:0016020//membrane;GO:0016021//integral component of membrane;	-	-	WAT1-related protein (AHRD V3.3 K4D4F6_SOLLC)
Solyc07g016210.1	36.6768	114.434	3.12007	1.64158	0.0191002	0.769309	-	-	virNOG26280	R	sp|P17772|OSS2_PEA Organ-specific protein S2 OS=Pisum sativum PE=2 SV=1	gi|723714082|ref|XP_010323501.1| PREDICTED: uncharacterized protein LOC104648268 [Solanum lycopersicum]	-	-	-	-	Specific tissue protein (AHRD V3.3 A0A2K3NKN8_TRIPR)
Solyc02g079280.3	65.7787	136.993	2.08263	1.05841	0.0193268	0.775606	-	K09422	virNOG13628	K	sp|Q9LDR8|MY102_ARATH Transcription factor MYB102 OS=Arabidopsis thaliana GN=MYB102 PE=2 SV=1	gi|460373979|ref|XP_004232789.1| PREDICTED: transcription factor MYB39 [Solanum lycopersicum]	-	-	-	-	MYB transcription factor (AHRD V3.3 A0A0U3IU11_MESCR)
Solyc01g108740.3	162.197	361.729	2.23018	1.15716	0.0196923	0.782242	-	-	virNOG14268;euNOG07940	R	sp|Q6RYA0|SABP2_TOBAC Salicylic acid-binding protein 2 OS=Nicotiana tabacum GN=SABP2 PE=1 SV=1	gi|460371160|ref|XP_004231412.1| PREDICTED: salicylic acid-binding protein 2-like [Solanum lycopersicum]	-	-	-	-	Methylketone synthase Ib (AHRD V3.3 E0YCS5_SOLLC)
Solyc06g059730.3	10.3532	31.2044	3.01398	1.59167	0.0197393	0.782867	GO:0016021;GO:0055085	K13947	-	-	-	-	GO:0055085//transmembrane transport;	GO:0016021//integral component of membrane;	-	-	SlPIN6
Solyc01g109170.3	117.471	293.362	2.49733	1.32039	0.0199447	0.786051	GO:0016021	-	virNOG06877;virNOG14022	SI	sp|Q9XIA9|LACS2_ARATH Long chain acyl-CoA synthetase 2 OS=Arabidopsis thaliana GN=LACS2 PE=2 SV=1	gi|460370002|ref|XP_004230844.1| PREDICTED: long chain acyl-CoA synthetase 2 [Solanum lycopersicum]	-	GO:0016021//integral component of membrane;	-	-	Cold-regulated plasma membrane protein 2 (AHRD V3.3 A0A1U8E7A7_CAPAN)
Solyc09g097890.2	45.0052	91.0359	2.02278	1.01634	0.020019	0.786051	-	-	virNOG02806	T	sp|Q9LSE7|B561C_ARATH Cytochrome b561 and DOMON domain-containing protein At3g25290 OS=Arabidopsis thaliana GN=At3g25290 PE=2 SV=1	gi|460405113|ref|XP_004248021.1| PREDICTED: cytochrome b561 and DOMON domain-containing protein At3g25290-like [Solanum lycopersicum]	-	-	-	-	Cytochrome b561 and DOMON domain-containing protein (AHRD V3.3 A0A2G2YQA7_CAPAN)
Solyc03g112540.4	268.614	550.417	2.0491	1.03499	0.0200341	0.786051	-	-	-	-	-	-	-	-	-	-	NAD(P)-binding Rossmann-fold superfamily protein (AHRD V3.3 A0A2U1Q346_ARTAN)
Solyc11g011570.1	43.5413	87.7416	2.01514	1.01088	0.0202155	0.788556	-	-	virNOG40113;virNOG25136;KOG0800	O	sp|Q9SNB6|RDUF1_ARATH E3 ubiquitin-protein ligase RDUF1 OS=Arabidopsis thaliana GN=RDUF1 PE=1 SV=1	gi|460409570|ref|XP_004250211.1| PREDICTED: uncharacterized protein LOC101265880 [Solanum lycopersicum]	-	-	-	-	RING/U-box superfamily protein (AHRD V3.3 A0A1I9LQQ9_ARATH)
Solyc04g072790.2	27.2499	73.8466	2.70998	1.43828	0.0203563	0.790641	GO:0016020;GO:0016760;GO:0030244	K10999	virNOG02099	O	sp|Q69V23|CESA3_ORYSJ Probable cellulose synthase A catalytic subunit 3 [UDP-forming] OS=Oryza sativa subsp. japonica GN=CESA3 PE=2 SV=1	gi|460385657|ref|XP_004238519.1| PREDICTED: probable cellulose synthase A catalytic subunit 3 [UDP-forming] [Solanum lycopersicum]	GO:0030244//cellulose biosynthetic process;	GO:0016020//membrane;	GO:0016760//cellulose synthase (UDP-forming) activity;	-	Cellulose synthase (AHRD V3.3 K4BTR6_SOLLC)
Solyc11g012640.1	5.80848	22.1247	3.80903	1.92943	0.0207925	0.796547	-	-	virNOG21191	S	-	gi|460409728|ref|XP_004250290.1| PREDICTED: uncharacterized protein LOC101263778 [Solanum lycopersicum]	-	-	-	-	transmembrane protein (AHRD V3.3 AT4G16410.1)
Solyc07g047840.2	6.86678	24.1045	3.51031	1.8116	0.0208435	0.796547	-	-	-	-	-	-	-	-	-	-	chaperone (AHRD V3.3 AT5G15802.1)
Solyc04g071930.4	53.3034	118.582	2.22466	1.15358	0.0209562	0.796547	-	-	-	-	-	-	-	-	-	-	Chlorophyll a/b binding protein domain-containing protein (AHRD V3.3 A0A2U1NAK6_ARTAN)
Solyc06g054310.1	21.3921	49.2782	2.30357	1.20387	0.0212258	0.801488	-	-	virNOG21338	S	sp|Q6NMR8|FAF3_ARATH Protein FANTASTIC FOUR 3 OS=Arabidopsis thaliana GN=FAF3 PE=2 SV=1	gi|723706689|ref|XP_010322261.1| PREDICTED: protein FANTASTIC FOUR 3-like [Solanum lycopersicum]	-	-	-	-	Fantastic four-like protein (AHRD V3.3 A0A2K3NF15_TRIPR)
Solyc01g106710.1	11.9066	34.0172	2.857	1.5145	0.0215288	0.810373	GO:0003677;GO:0046983	-	virNOG18875;virNOG14266	K	sp|Q9FKK2|AGL62_ARATH Agamous-like MADS-box protein AGL62 OS=Arabidopsis thaliana GN=AGL62 PE=1 SV=1	gi|460371090|ref|XP_004231378.1| PREDICTED: agamous-like MADS-box protein AGL62 [Solanum lycopersicum]	-	-	GO:0003677//DNA binding;GO:0046983//protein dimerization activity;	-	Transcription factor, MADS-box (AHRD V3.3 A0A2U1P6T8_ARTAN)
Solyc03g121180.4	21.2529	50.1107	2.35782	1.23745	0.0222383	0.824705	GO:0016788	-	-	-	-	-	-	-	GO:0016788//hydrolase activity, acting on ester bonds;	-	GDSL esterase/lipase (AHRD V3.3 A0A2G3D0P9_CAPCH)
Solyc06g059850.2	261.221	562.26	2.15243	1.10597	0.022461	0.82968	GO:0016624	K00166	virNOG07319	C	sp|Q9LPL5|ODBA1_ARATH 2-oxoisovalerate dehydrogenase subunit alpha 1, mitochondrial OS=Arabidopsis thaliana GN=At1g21400 PE=2 SV=1	gi|723710734|ref|XP_004242055.2| PREDICTED: 2-oxoisovalerate dehydrogenase subunit alpha 1, mitochondrial-like [Solanum lycopersicum]	-	-	GO:0016624//oxidoreductase activity, acting on the aldehyde or oxo group of donors, disulfide as acceptor;	ko00640(Propanoate metabolism);ko00280(Valine, leucine and isoleucine degradation)	2-oxoisovalerate dehydrogenase subunit alpha 2, mitochondrial (AHRD V3.3 A0A2G2WJC6_CAPBA)
Solyc06g073290.1	38.5796	91.7572	2.37839	1.24998	0.0227754	0.833101	-	-	virNOG17482	S	sp|Q9LX31|GUN4C_ARATH Tetrapyrrole-binding protein, chloroplastic OS=Arabidopsis thaliana GN=GUN4 PE=1 SV=1	gi|460391603|ref|XP_004241410.1| PREDICTED: tetrapyrrole-binding protein, chloroplastic [Solanum lycopersicum]	-	-	-	-	Tetrapyrrole-binding protein, chloroplastic (AHRD V3.3 A0A2G2ZDA2_CAPAN)
Solyc07g008540.3	156.388	388.86	2.4865	1.31412	0.023245	0.840953	GO:0005515	-	virNOG14303	K	sp|Q9LU68|CIA2_ARATH Protein CHLOROPLAST IMPORT APPARATUS 2 OS=Arabidopsis thaliana GN=CIA2 PE=1 SV=1	gi|460394426|ref|XP_004242804.1| PREDICTED: protein CHLOROPLAST IMPORT APPARATUS 2 isoform X1 [Solanum lycopersicum]	-	-	GO:0005515//protein binding;	-	Zinc finger protein CONSTANS-LIKE 2 (AHRD V3.3 COL2_ARATH)
Solyc06g036460.4	11.6845	33.0152	2.82555	1.49853	0.0234198	0.840953	-	-	-	-	-	-	-	-	-	-	membrane-associated kinase regulator (AHRD V3.3 AT5G52900.1)
Solyc02g062990.1	0.303217	7.61464	25.1128	4.65035	0.0235043	0.840953	-	-	virNOG06561;virNOG04280;KOG1192	CG	sp|Q40287|UFOG5_MANES Anthocyanidin 3-O-glucosyltransferase 5 OS=Manihot esculenta GN=GT5 PE=2 SV=1	gi|970008890|ref|XP_015065324.1| PREDICTED: anthocyanidin 3-O-glucosyltransferase 5-like [Solanum pennellii]	-	-	-	-	Glycosyltransferase (AHRD V3.3 A0A2I4ENI5_9ROSI)
Solyc06g074190.3	59.7107	122.108	2.04499	1.03209	0.0235313	0.840953	-	-	COG2124;virNOG13902	SQ	sp|Q9SRQ1|C89A9_ARATH Cytochrome P450 89A9 OS=Arabidopsis thaliana GN=CYP89A9 PE=2 SV=1	gi|460391445|ref|XP_004241331.1| PREDICTED: uncharacterized protein At5g41620-like [Solanum lycopersicum]	-	-	-	-	Plant/F24K9-26 protein (AHRD V3.3 A0A072UED0_MEDTR)
Solyc09g074620.3	19.2785	46.0858	2.39052	1.25733	0.0236208	0.840953	-	-	virNOG03374	O	sp|Q9SMS0|NDHT_ARATH NAD(P)H-quinone oxidoreductase subunit T, chloroplastic OS=Arabidopsis thaliana GN=ndhT PE=1 SV=1	gi|460403959|ref|XP_004247453.1| PREDICTED: uncharacterized protein LOC101257008 [Solanum lycopersicum]	-	-	-	-	zinc metalloproteinase aureolysin (AHRD V3.3 AT3G62920.1)
Solyc09g008500.3	79.6053	184.219	2.31415	1.21048	0.0236305	0.840953	-	-	-	-	-	-	-	-	-	-	Non-specific lipid-transfer protein (AHRD V3.3 K4CQN8_SOLLC)
Solyc07g044710.2	18.633	46.3517	2.48761	1.31476	0.0238702	0.846454	GO:0003860	K05605	COG1024	I	sp|Q9SHJ8|HIBC8_ARATH 3-hydroxyisobutyryl-CoA hydrolase-like protein 5 OS=Arabidopsis thaliana GN=At1g06550 PE=1 SV=2	gi|460396117|ref|XP_004243625.1| PREDICTED: 3-hydroxyisobutyryl-CoA hydrolase-like protein 5 [Solanum lycopersicum]	-	-	GO:0003860//3-hydroxyisobutyryl-CoA hydrolase activity;	ko00640(Propanoate metabolism);ko00410(beta-Alanine metabolism);ko00280(Valine, leucine and isoleucine degradation)	3-hydroxyisobutyryl-CoA hydrolase-like protein 5 (AHRD V3.3 A0A2G2XQ26_CAPBA)
Solyc07g042440.3	41.2334	96.9671	2.35167	1.23368	0.0241794	0.850619	GO:0016209;GO:0016491;GO:0055114	K03564	virNOG03423	O	sp|Q6QPJ6|PRXQ_POPJC Peroxiredoxin Q, chloroplastic OS=Populus jackii GN=PRXQ PE=1 SV=1	gi|840083088|ref|NP_001296952.1| peroxiredoxin Q, chloroplastic [Solanum lycopersicum] gi|840084698|ref|NP_001296953.1| peroxiredoxin Q, chloroplastic [Solanum lycopersicum]	GO:0055114//obsolete oxidation-reduction process;	-	GO:0016209//antioxidant activity;GO:0016491//oxidoreductase activity;	-	Peroxiredoxin Q (AHRD V3.3 D7TCA6_VITVI)
Solyc02g080120.3	32.7078	82.3617	2.51811	1.33234	0.0242659	0.850619	GO:0016491;GO:0055114	-	-	-	-	-	GO:0055114//obsolete oxidation-reduction process;	-	GO:0016491//oxidoreductase activity;	-	Gibberellin 2-beta-dioxygenase 8 (AHRD V3.3 A0A1U8FMY1_CAPAN)
Solyc04g082010.1	7.90555	26.2464	3.31999	1.73118	0.0246611	0.85612	GO:0005507;GO:0009055	K02638	virNOG20093	C	sp|P17340|PLAS_SOLLC Plastocyanin, chloroplastic OS=Solanum lycopersicum GN=PETE PE=2 SV=1	gi|822885228|ref|NP_001296192.1| plastocyanin, chloroplastic [Solanum lycopersicum] gi|970023893|ref|XP_015073270.1| PREDICTED: plastocyanin, chloroplastic [Solanum pennellii] gi|130271|sp|P17340.1|PLAS_SOLLC RecName: Full=Plastocyanin, chloroplastic; Flags: Precursor gi|19300|emb|CAA32121.1| unnamed protein product [Solanum lycopersicum]	-	-	GO:0005507//copper ion binding;GO:0009055//electron transfer activity;	ko00195(Photosynthesis)	pre-plastocyanin
Solyc02g081600.4	296.339	619.288	2.0898	1.06336	0.024773	0.856586	GO:0016020;GO:0030001;GO:0046873;GO:0055085	-	-	-	-	-	GO:0030001//metal ion transport;GO:0055085//transmembrane transport;	GO:0016020//membrane;	GO:0046873//metal ion transmembrane transporter activity;	-	Zinc transporter protein (AHRD V3.3 A5BDR3_VITVI)
Solyc05g005680.3	189.015	396.16	2.09591	1.06758	0.0249372	0.85921	GO:0004553;GO:0005975	K08235	virNOG12816	G	sp|Q8LC45|XTH33_ARATH Probable xyloglucan endotransglucosylase/hydrolase protein 33 OS=Arabidopsis thaliana GN=XTH33 PE=2 SV=2	gi|460385972|ref|XP_004238674.1| PREDICTED: probable xyloglucan endotransglucosylase/hydrolase protein 33 [Solanum lycopersicum]	GO:0005975//carbohydrate metabolic process;	-	GO:0004553//hydrolase activity, hydrolyzing O-glycosyl compounds;	-	Xyloglucan endotransglucosylase/hydrolase (AHRD V3.3 K4BW96_SOLLC)
Solyc11g072200.2	9888.15	25027.1	2.53102	1.33972	0.0250562	0.861024	GO:0016491;GO:0055114	-	virNOG08702;COG3491	QR	sp|P24397|HY6H_HYONI Hyoscyamine 6-dioxygenase OS=Hyoscyamus niger GN=H6H PE=1 SV=1	gi|460411705|ref|XP_004251246.1| PREDICTED: hyoscyamine 6-dioxygenase-like [Solanum lycopersicum]	GO:0055114//obsolete oxidation-reduction process;	-	GO:0016491//oxidoreductase activity;	-	2-oxoglutarate (2OG) and Fe(II)-dependent oxygenase superfamily protein (AHRD V3.3 F4IV21_ARATH)
Solyc06g008240.3	14.1582	38.1544	2.69485	1.43021	0.0253076	0.867371	-	-	virNOG24829;virNOG23860	SR	sp|Q1PF35|RIC6_ARATH CRIB domain-containing protein RIC6 OS=Arabidopsis thaliana GN=RIC6 PE=1 SV=1	gi|460389692|ref|XP_004240484.1| PREDICTED: CRIB domain-containing protein RIC6-like [Solanum lycopersicum]	-	-	-	-	CRIB domain-containing protein RIC6 (AHRD V3.3 A0A2G2Z6W9_CAPAN)
Solyc02g089840.3	418.83	873.235	2.08494	1.06001	0.0255507	0.871105	-	K20858	KOG2966;virNOG05653	S	sp|O64823|MCU2_ARATH Calcium uniporter protein 2, mitochondrial OS=Arabidopsis thaliana GN=At2g23790 PE=2 SV=1	gi|460372550|ref|XP_004232092.1| PREDICTED: uncharacterized protein LOC101262879 [Solanum lycopersicum]	-	-	-	-	Calcium uniporter protein 2, mitochondrial (AHRD V3.3 A0A2G3ABZ2_CAPAN)
Solyc01g081480.3	2.10947	12.3909	5.87395	2.55433	0.0258298	0.87602	GO:0016788	-	virNOG39041	S	sp|Q5JNC0|COQ5_ORYSJ 2-methoxy-6-polyprenyl-1,4-benzoquinol methylase, mitochondrial OS=Oryza sativa subsp. japonica GN=COQ5 PE=2 SV=1	gi|460367360|ref|XP_004229542.1| PREDICTED: uncharacterized protein LOC101262956 [Solanum lycopersicum]	-	-	GO:0016788//hydrolase activity, acting on ester bonds;	-	GPI inositol-deacylase PGAP1-like protein (AHRD V3.3 A0A2U1LZR3_ARTAN)
Solyc10g150102.1	3.63031	16.3702	4.50932	2.17291	0.0259272	0.876056	-	-	-	-	-	-	-	-	-	-	Nucleic acid-binding, OB-fold protein (AHRD V3.3 A0A2U1LWI4_ARTAN)
Solyc08g008110.2	22.6382	51.1166	2.25798	1.17503	0.0259724	0.876056	GO:0009058;GO:0030170	-	-	-	-	-	GO:0009058//biosynthetic process;	-	GO:0030170//pyridoxal phosphate binding;	-	1-aminocyclopropane-1-carboxylate synthase (AHRD V3.3 Q9SAZ4_SOLLC)
Solyc04g018130.1	9.03191	26.9723	2.98633	1.57837	0.0260357	0.876056	-	-	-	-	-	-	-	-	-	-	Unknown protein
Solyc04g077750.2	4.02176	17.1508	4.26449	2.09237	0.0260669	0.876056	-	-	-	-	-	-	-	-	-	-	Unknown protein
Solyc04g008850.1	40.4936	81.0182	2.00076	1.00055	0.0261971	0.878161	-	-	virNOG06022	O	sp|Q9LHE3|ASPG2_ARATH Protein ASPARTIC PROTEASE IN GUARD CELL 2 OS=Arabidopsis thaliana GN=ASPG2 PE=2 SV=1	gi|460382279|ref|XP_004236867.1| PREDICTED: protein ASPARTIC PROTEASE IN GUARD CELL 2-like [Solanum lycopersicum]	-	-	-	-	Eukaryotic aspartyl protease family protein (AHRD V3.3 Q9C6M0_ARATH)
Solyc03g098480.1	66.4688	138.683	2.08644	1.06105	0.0264297	0.881657	-	-	-	-	-	gi|970016030|ref|XP_015069105.1| PREDICTED: uncharacterized protein LOC107013744 [Solanum pennellii]	-	-	-	-	chromosome alignment-maintaining phosphoprotein 1-like isoform X2 (AHRD V3.3 XP_017702391.1)
Solyc06g084120.4	26.4065	57.1675	2.16491	1.1143	0.0271074	0.894818	-	-	-	-	-	-	-	-	-	-	Jasmonate ZIM domain protein k.1 (AHRD V3.3 I3WTA8_NICAT)
Solyc11g065680.1	4.90121	19.2356	3.92466	1.97257	0.0272152	0.894967	-	-	virNOG26292	S	-	gi|460411063|ref|XP_004250934.1| PREDICTED: uncharacterized protein LOC101247982 [Solanum lycopersicum]	-	-	-	-	transmembrane protein (AHRD V3.3 AT2G01870.1)
Solyc12g098290.1	39.4391	95.2241	2.41446	1.2717	0.0275401	0.896481	-	-	-	-	-	gi|1026004382|ref|XP_016554018.1| PREDICTED: glycine-rich cell wall structural protein-like [Capsicum annuum]	-	-	-	-	acanthoscurrin-1-like (AHRD V3.3 XP_010314853.1)
Solyc10g017510.3	3743.92	9140.71	2.44148	1.28776	0.0279825	0.90411	GO:0005506;GO:0016705;GO:0020037;GO:0055114	-	virNOG00331	Q	sp|A6YIH8|C7D55_HYOMU Premnaspirodiene oxygenase OS=Hyoscyamus muticus GN=CYP71D55 PE=1 SV=1	gi|460406255|ref|XP_004248582.1| PREDICTED: premnaspirodiene oxygenase-like isoform X1 [Solanum lycopersicum]	GO:0055114//obsolete oxidation-reduction process;	-	GO:0005506//iron ion binding;GO:0016705//oxidoreductase activity, acting on paired donors, with incorporation or reduction of molecular oxygen;GO:0020037//heme binding;	-	Cytochrome (AHRD V3.3 A0A1U8EF26_CAPAN)
Solyc02g086350.3	23.7859	53.0411	2.22993	1.157	0.0282013	0.90411	-	-	virNOG17856;virNOG02441	SR	sp|Q9C9N6|PMI2_ARATH Protein PLASTID MOVEMENT IMPAIRED 2 OS=Arabidopsis thaliana GN=PMI2 PE=1 SV=1	gi|460373043|ref|XP_004232332.1| PREDICTED: protein PLASTID MOVEMENT IMPAIRED 2 [Solanum lycopersicum]	-	-	-	-	Protein PLASTID MOVEMENT IMPAIRED 2 (AHRD V3.3 A0A1J3GMT9_NOCCA)
Solyc03g007950.3	10.631	30.3022	2.85037	1.51115	0.0286625	0.91015	GO:0004650;GO:0005975	-	COG5434;virNOG05862;virNOG05186	MR	sp|A7PZL3|PGLR_VITVI Probable polygalacturonase OS=Vitis vinifera GN=GSVIVT00026920001 PE=1 SV=1	gi|970015002|ref|XP_015068509.1| PREDICTED: probable polygalacturonase [Solanum pennellii]	GO:0005975//carbohydrate metabolic process;	-	GO:0004650//polygalacturonase activity;	-	Pectin lyase-like superfamily protein (AHRD V3.3 O81746_ARATH)
Solyc03g005630.3	345.538	695.533	2.0129	1.00927	0.028852	0.911734	-	-	virNOG06848	S	-	gi|460376518|ref|XP_004234045.1| PREDICTED: uncharacterized protein LOC101263974 [Solanum lycopersicum]	-	-	-	-	DUF810 domain-containing protein (AHRD V3.3 A0A1Q3AX67_CEPFO),Pfam:PF05664
Solyc09g014560.2	24.91	55.1851	2.21538	1.14755	0.0289986	0.911734	GO:0006952	-	-	-	sp|Q941R6|MLP31_ARATH MLP-like protein 31 OS=Arabidopsis thaliana GN=MLP31 PE=2 SV=2	gi|970050676|ref|XP_015086865.1| PREDICTED: MLP-like protein 34 [Solanum pennellii]	GO:0006952//defense response;	-	-	-	MLP-like protein 28 (AHRD V3.3 A8MR61_ARATH)
Solyc09g083190.3	0	5.69185	Inf	Inf	0.0295179	0.91802	-	-	virNOG17593	S	sp|Q9FG89|PNSB5_ARATH Photosynthetic NDH subunit of subcomplex B 5, chloroplastic OS=Arabidopsis thaliana GN=PNSB5 PE=2 SV=1	gi|460404325|ref|XP_004247633.1| PREDICTED: uncharacterized protein LOC101266364 [Solanum lycopersicum]	-	-	-	-	NAD(P)H dehydrogenase 18 (AHRD V3.3 A0A0F7CYQ9_9ROSI)
Solyc01g090660.3	34.3001	69.6455	2.03047	1.02182	0.0298633	0.91802	GO:0016702;GO:0055114	K17912	virNOG03818	Q	sp|Q7XJM2|CCD7_ARATH Carotenoid cleavage dioxygenase 7, chloroplastic OS=Arabidopsis thaliana GN=CCD7 PE=1 SV=1	gi|350535122|ref|NP_001234433.1| carotenoid cleavage dioxygenase 7 [Solanum lycopersicum] gi|262262692|gb|ACY39882.1| carotenoid cleavage dioxygenase 7 [Solanum lycopersicum] gi|262262694|gb|ACY39883.1| carotenoid cleavage dioxygenase 7 [Solanum lycopersicum]	GO:0055114//obsolete oxidation-reduction process;	-	GO:0016702//oxidoreductase activity, acting on single donors with incorporation of molecular oxygen, incorporation of two atoms of oxygen;	ko00906(Carotenoid biosynthesis)	carotenoid cleavage dioxygenase7
Solyc02g089850.3	365.978	761.215	2.07995	1.05655	0.0298835	0.91802	-	-	KOG2966;virNOG05653	S	sp|O64823|MCU2_ARATH Calcium uniporter protein 2, mitochondrial OS=Arabidopsis thaliana GN=At2g23790 PE=2 SV=1	gi|460372550|ref|XP_004232092.1| PREDICTED: uncharacterized protein LOC101262879 [Solanum lycopersicum]	-	-	-	-	Calcium uniporter protein 1, mitochondrial (AHRD V3.3 A0A2G3D8W7_CAPCH)
Solyc02g091800.4	266.798	534.175	2.00217	1.00157	0.0302176	0.921187	GO:0046983	-	-	-	-	-	-	-	GO:0046983//protein dimerization activity;	-	Basic helix-loop-helix (BHLH) DNA-binding superfamily protein (AHRD V3.3 A0A2U1Q8Y8_ARTAN)
Solyc08g014330.3	408.922	1040.18	2.54371	1.34694	0.0306982	0.926259	GO:0005507;GO:0008131;GO:0009308;GO:0048038;GO:0055114	K00276	virNOG01461	Q	sp|Q07121|AMO1_ARTS1 Primary amine oxidase OS=Arthrobacter sp. (strain P1) GN=maoI PE=1 SV=1	gi|460398432|ref|XP_004244763.1| PREDICTED: copper amine oxidase 1-like [Solanum lycopersicum]	GO:0009308//amine metabolic process;GO:0055114//obsolete oxidation-reduction process;	-	GO:0005507//copper ion binding;GO:0008131//primary amine oxidase activity;GO:0048038//quinone binding;	ko00960(Tropane, piperidine and pyridine alkaloid biosynthesis);ko00950(Isoquinoline alkaloid biosynthesis);ko00410(beta-Alanine metabolism);ko00360(Phenylalanine metabolism);ko00350(Tyrosine metabolism);ko00260(Glycine, serine and threonine metabolism)	Amine oxidase (AHRD V3.3 A4GZ88_TOBAC)
Solyc09g089950.1	10.9573	39.1199	3.57023	1.83602	0.030802	0.927494	-	-	-	-	-	-	-	-	-	-	Unknown protein
Solyc11g010410.2	0	5.52962	Inf	Inf	0.0312842	0.934418	GO:0016491;GO:0055114	-	virNOG08702;COG3491	QR	sp|P24397|HY6H_HYONI Hyoscyamine 6-dioxygenase OS=Hyoscyamus niger GN=H6H PE=1 SV=1	gi|723741571|ref|XP_004250131.2| PREDICTED: hyoscyamine 6-dioxygenase-like [Solanum lycopersicum]	GO:0055114//obsolete oxidation-reduction process;	-	GO:0016491//oxidoreductase activity;	-	2-oxoglutarate (2OG) and Fe(II)-dependent oxygenase superfamily protein (AHRD V3.3 A0A2U1NR61_ARTAN)
Solyc03g116910.3	428.914	899.254	2.09658	1.06804	0.0317139	0.937205	GO:0003824;GO:0050662	K09753	virNOG04079	Q	sp|Q9S9N9|CCR1_ARATH Cinnamoyl-CoA reductase 1 OS=Arabidopsis thaliana GN=CCR1 PE=1 SV=1	gi|350537525|ref|NP_001234297.1| cinnamoyl-CoA reductase [Solanum lycopersicum] gi|65306614|gb|AAY41880.1| cinnamoyl-CoA reductase [Solanum lycopersicum]	-	-	GO:0003824//catalytic activity;GO:0050662//obsolete coenzyme binding;	ko00940(Phenylpropanoid biosynthesis)	cinnamoyl-CoA reductase 2
Solyc02g071610.3	1.24307	10.3975	8.36433	3.06425	0.0320349	0.940378	GO:0016788	-	virNOG07082	R	sp|Q9FK75|GDL82_ARATH GDSL esterase/lipase At5g45670 OS=Arabidopsis thaliana GN=At5g45670 PE=2 SV=1	gi|460374383|ref|XP_004232990.1| PREDICTED: GDSL esterase/lipase At5g45670 [Solanum lycopersicum]	-	-	GO:0016788//hydrolase activity, acting on ester bonds;	-	GDSL esterase/lipase (AHRD V3.3 A0A2G2XF69_CAPBA)
Solyc10g050440.2	58.4048	141.903	2.42965	1.28075	0.0323154	0.944367	-	-	virNOG23064;virNOG21415	SK	-	gi|460406596|ref|XP_004248748.1| PREDICTED: uncharacterized protein LOC101250638 [Solanum lycopersicum]	-	-	-	-	Unknown protein
Solyc06g007240.4	57.0575	129.599	2.27138	1.18357	0.0324947	0.94533	GO:0051087	-	-	-	-	-	-	-	GO:0051087//chaperone binding;	-	BAG family molecular chaperone regulator 2-like (AHRD V3.3 A0A2I4GUW4_9ROSI)
Solyc09g018740.1	3.51662	15.8275	4.50078	2.17017	0.0325683	0.946411	-	-	-	-	-	-	-	-	-	-	Unknown protein
Solyc05g007110.2	111.732	257.756	2.30691	1.20596	0.032782	0.946552	GO:0003700;GO:0006355;GO:0043565	-	virNOG06081	K	sp|Q9LXG8|WRK72_ARATH Probable WRKY transcription factor 72 OS=Arabidopsis thaliana GN=WRKY72 PE=2 SV=1	gi|723697344|ref|XP_010320666.1| PREDICTED: probable WRKY transcription factor 72 isoform X1 [Solanum lycopersicum]	GO:0006355//regulation of transcription, DNA-templated;	-	GO:0003700//DNA-binding transcription factor activity;GO:0043565//sequence-specific DNA binding;	-	WRKY transcription factor 76
Solyc01g073670.3	2054.05	4254.97	2.07151	1.05068	0.0328201	0.946552	-	-	virNOG05136;KOG4830;NOG44228	G	sp|Q6NUT3|MFS12_HUMAN Major facilitator superfamily domain-containing protein 12 OS=Homo sapiens GN=MFSD12 PE=1 SV=2	gi|460366942|ref|XP_004229334.1| PREDICTED: major facilitator superfamily domain-containing protein 12-like [Solanum lycopersicum]	-	-	-	-	Major facilitator superfamily protein (AHRD V3.3 A0A2U1LP11_ARTAN),Pfam:PF13347
Solyc08g006710.3	6.02467	20.5701	3.41431	1.77159	0.0330497	0.946634	-	-	-	-	-	gi|970047980|ref|XP_015085532.1| PREDICTED: uncharacterized protein LOC107028835 [Solanum pennellii]	-	-	-	-	Unknown protein
Solyc02g094080.1	6.51504	21.6684	3.32591	1.73375	0.033583	0.953501	-	-	virNOG28034	R	sp|Q9SU30|CPR1_ARATH F-box protein CPR1 OS=Arabidopsis thaliana GN=CPR1 PE=1 SV=2	gi|723677983|ref|XP_010317268.1| PREDICTED: F-box protein CPR30-like [Solanum lycopersicum]	-	-	-	-	F-box/kelch-repeat protein (AHRD V3.3 A0A2G3B5C9_CAPCH)
Solyc12g017380.3	315.43	794.825	2.51981	1.33332	0.0338585	0.954655	GO:0016021;GO:0022857;GO:0055085	-	-	-	-	-	GO:0055085//transmembrane transport;	GO:0016021//integral component of membrane;	GO:0022857//transmembrane transporter activity;	-	Organic cation/carnitine transporter 2 (AHRD V3.3 A0A2G3BN50_CAPCH)
Solyc12g009510.1	8.37457	24.8678	2.96944	1.57019	0.0339187	0.954655	GO:0005515	-	COG4886;virNOG01078	SR	sp|Q9C9H7|RLP12_ARATH Receptor-like protein 12 OS=Arabidopsis thaliana GN=RLP12 PE=2 SV=2	gi|723747887|ref|XP_010313776.1| PREDICTED: receptor-like protein 12 [Solanum lycopersicum]	-	-	GO:0005515//protein binding;	-	receptor-like protein 12 (AHRD V3.3 A0A1S4DP57_TOBAC)
Solyc12g088400.1	29.7502	101.011	3.39531	1.76354	0.0341458	0.95487	-	-	virNOG22607	R	sp|Q9SSW0|AZF3_ARATH Zinc finger protein AZF3 OS=Arabidopsis thaliana GN=AZF3 PE=1 SV=1	gi|723752587|ref|XP_010314653.1| PREDICTED: zinc finger protein ZAT10-like [Solanum lycopersicum]	-	-	-	-	Zinc-finger protein (AHRD V3.3 Q40899_PETHY)
Solyc06g063050.4	12.9193	32.7705	2.53655	1.34287	0.034341	0.956009	-	-	-	-	-	-	-	-	-	-	GPI-anchored adhesin-like protein (AHRD V3.3 AT3G14172.2)
Solyc01g109500.4	7118.84	14888.9	2.09147	1.06452	0.0345508	0.956009	-	-	-	-	-	-	-	-	-	-	BURP domain-containing protein (AHRD V3.3 A0A1Q3C0F5_CEPFO)
Solyc02g067360.3	11.0709	30.1233	2.72093	1.4441	0.0349267	0.96017	GO:0005515	-	virNOG06647	O	sp|Q9LU10|DEGP8_ARATH Protease Do-like 8, chloroplastic OS=Arabidopsis thaliana GN=DEGP8 PE=1 SV=1	gi|460375130|ref|XP_004233360.1| PREDICTED: protease Do-like 8, chloroplastic [Solanum lycopersicum]	-	-	GO:0005515//protein binding;	-	Protease Do-like 8, chloroplastic (AHRD V3.3 A0A2G3A5X1_CAPAN)
Solyc11g010340.2	72.0621	187.914	2.60767	1.38276	0.0350623	0.961514	GO:0046983	-	virNOG18925;virNOG16764;virNOG07442	K	sp|Q9C7T4|BH096_ARATH Transcription factor bHLH96 OS=Arabidopsis thaliana GN=BHLH96 PE=1 SV=1	gi|460409395|ref|XP_004250124.1| PREDICTED: transcription factor bHLH96-like [Solanum lycopersicum]	-	-	GO:0046983//protein dimerization activity;	-	bHLH transcription factor 069
Solyc02g077000.3	4118.31	8558.38	2.07813	1.05528	0.0354479	0.963737	GO:0006629	-	virNOG05413	I	sp|A2ZW16|PLA1_ORYSJ Phospholipase A1-II 1 OS=Oryza sativa subsp. japonica GN=Os01g0651100 PE=3 SV=2	gi|460374333|ref|XP_004232965.1| PREDICTED: phospholipase A1-IIgamma-like [Solanum lycopersicum]	GO:0006629//lipid metabolic process;	-	-	-	Phospholipase A1-II 1 (AHRD V3.3 A0A1U8FS88_CAPAN)
Solyc06g060900.1	80.4244	184.327	2.29192	1.19656	0.0355199	0.963737	-	-	-	-	-	-	-	-	-	-	Unknown protein
Solyc11g069630.1	34.3174	75.1378	2.18949	1.1306	0.0357329	0.963737	GO:0004672;GO:0006468	-	virNOG17112	T	sp|O64825|LYK4_ARATH LysM domain receptor-like kinase 4 OS=Arabidopsis thaliana GN=LYK4 PE=1 SV=1	gi|460412021|ref|XP_004251402.1| PREDICTED: lysM domain receptor-like kinase 4 [Solanum lycopersicum]	GO:0006468//protein phosphorylation;	-	GO:0004672//protein kinase activity;	-	Peptidoglycan-binding lysin domain-containing protein (AHRD V3.3 A0A2U1NKN6_ARTAN)
Solyc02g070200.3	519.242	1081.84	2.0835	1.05901	0.0357613	0.963737	GO:0016491;GO:0050660;GO:0055114	-	-	-	-	-	GO:0055114//obsolete oxidation-reduction process;	-	GO:0016491//oxidoreductase activity;GO:0050660//flavin adenine dinucleotide binding;	-	FAD-binding Berberine family protein (AHRD V3.3 A0A2U1LDC6_ARTAN)
Solyc12g017250.2	10.8293	28.5226	2.63383	1.39716	0.0359915	0.967932	GO:0009523;GO:0009654;GO:0015979;GO:0042651	K03541	virNOG22648	G	sp|Q40519|PSBR_TOBAC Photosystem II 10 kDa polypeptide, chloroplastic OS=Nicotiana tabacum GN=PSBR PE=2 SV=1	gi|460413138|ref|XP_004251952.1| PREDICTED: photosystem II 10 kDa polypeptide, chloroplastic isoform X1 [Solanum lycopersicum]	GO:0015979//photosynthesis;	GO:0009523//photosystem II;GO:0009654//photosystem II oxygen evolving complex;GO:0042651//thylakoid membrane;	-	ko00195(Photosynthesis)	photosystem II 10 kDa polypeptide, chloroplastic (AHRD V3.3 A0A2I4F6M0_9ROSI)
Solyc05g055570.3	9.15511	25.6006	2.79632	1.48353	0.0361039	0.968124	-	-	-	-	-	-	-	-	-	-	E3 ubiquitin-protein ligase RKP (AHRD V3.3 A0A1U8EU57_CAPAN)
Solyc08g083150.1	11.8693	31.4744	2.65175	1.40695	0.0362153	0.968124	-	-	-	-	-	-	-	-	-	-	Unknown protein
Solyc02g077110.3	28.7808	69.4387	2.41268	1.27063	0.0366176	0.970702	GO:0006629	-	virNOG05584	I	sp|A2ZW16|PLA1_ORYSJ Phospholipase A1-II 1 OS=Oryza sativa subsp. japonica GN=Os01g0651100 PE=3 SV=2	gi|723675027|ref|XP_004232957.2| PREDICTED: phospholipase A1-II 1-like [Solanum lycopersicum]	GO:0006629//lipid metabolic process;	-	-	-	Phospholipase A1-II 1 (AHRD V3.3 A0A2G2XE87_CAPBA)
Solyc04g047885.1	141.857	303.217	2.13749	1.09591	0.0367191	0.972209	-	-	-	-	-	-	-	-	-	-	Unknown protein
Solyc09g011970.3	34.4116	69.0636	2.00699	1.00503	0.0375482	0.982179	GO:0005507;GO:0016491;GO:0055114	K05909	-	-	-	-	GO:0055114//obsolete oxidation-reduction process;	-	GO:0005507//copper ion binding;GO:0016491//oxidoreductase activity;	-	Laccase (AHRD V3.3 K4CRM2_SOLLC)
Solyc09g089990.3	17.4095	40.5525	2.32933	1.21992	0.0377955	0.983857	GO:0045735	-	virNOG01631	R	sp|Q9FIC6|GL117_ARATH Germin-like protein subfamily 1 member 17 OS=Arabidopsis thaliana GN=At5g39150 PE=2 SV=1	gi|460404503|ref|XP_004247721.1| PREDICTED: germin-like protein subfamily 1 member 17 [Solanum lycopersicum]	-	-	GO:0045735//nutrient reservoir activity;	-	Germin-like protein subfamily 1 member 20 (AHRD V3.3 A0A2G3CSE3_CAPCH)
Solyc01g044365.1	78.3355	157.858	2.01515	1.01089	0.038117	0.98581	-	-	-	-	-	-	-	-	-	-	Alg9-like mannosyltransferase family (AHRD V3.3 AT5G14850.2)
Solyc05g053170.3	1515.6	3914.29	2.58267	1.36886	0.0383729	0.989709	-	K00660	COG3424;virNOG10548	HQ	sp|P22924|CHSB_PETHY Chalcone synthase B OS=Petunia hybrida GN=CHSB PE=2 SV=1	gi|460388486|ref|XP_004239898.1| PREDICTED: chalcone synthase B [Solanum lycopersicum]	-	-	-	ko04712(Circadian rhythm - plant);ko00941(Flavonoid biosynthesis)	Chalcone synthase (AHRD V3.3 A0A2G2ZJX1_CAPAN)
Solyc09g075710.1	57.5745	181.178	3.14685	1.65391	0.03894	0.993736	GO:0016787	-	COG0657	I	sp|Q5NUF4|HIDM_GLYEC 2-hydroxyisoflavanone dehydratase OS=Glycyrrhiza echinata GN=HIDM PE=1 SV=1	gi|460403804|ref|XP_004247376.1| PREDICTED: 2-hydroxyisoflavanone dehydratase-like [Solanum lycopersicum]	-	-	GO:0016787//hydrolase activity;	-	Alpha/beta-Hydrolases superfamily protein (AHRD V3.3 A0A2U1KC75_ARTAN)
Solyc01g067510.3	203.22	412.979	2.03218	1.02303	0.0396482	1	GO:0004672;GO:0006468	-	virNOG03130	T	sp|Q9LX29|ACR4L_ARATH Serine/threonine-protein kinase-like protein ACR4 OS=Arabidopsis thaliana GN=ACR4 PE=1 SV=1	gi|970004351|ref|XP_015062968.1| PREDICTED: proline-rich receptor-like protein kinase PERK14 [Solanum pennellii] gi|970004353|ref|XP_015062969.1| PREDICTED: proline-rich receptor-like protein kinase PERK14 [Solanum pennellii]	GO:0006468//protein phosphorylation;	-	GO:0004672//protein kinase activity;	-	receptor-like protein kinase FERONIA (AHRD V3.3 A0A2I4F2T3_9ROSI)
Solyc04g078910.3	12.0156	31.1693	2.59408	1.37522	0.0409572	1	GO:0045454	-	virNOG18355	O	sp|Q9C5C5|TRL4_ARATH Thioredoxin-like 4, chloroplastic OS=Arabidopsis thaliana GN=At1g07700 PE=2 SV=1	gi|723695350|ref|XP_010320331.1| PREDICTED: thioredoxin-like 4, chloroplastic [Solanum lycopersicum] gi|723695353|ref|XP_010320332.1| PREDICTED: thioredoxin-like 4, chloroplastic [Solanum lycopersicum]	GO:0045454//cell redox homeostasis;	-	-	-	Thioredoxin-like 4, chloroplastic (AHRD V3.3 A0A2G2VBX3_CAPBA)
Solyc01g104550.3	158.555	321.516	2.02778	1.0199	0.0419198	1	GO:0003700;GO:0006355;GO:0043565	-	virNOG03914	K	sp|Q9C9F0|WRKY9_ARATH Probable WRKY transcription factor 9 OS=Arabidopsis thaliana GN=WRKY9 PE=2 SV=1	gi|460369512|ref|XP_004230606.1| PREDICTED: probable WRKY transcription factor 9 [Solanum lycopersicum]	GO:0006355//regulation of transcription, DNA-templated;	-	GO:0003700//DNA-binding transcription factor activity;GO:0043565//sequence-specific DNA binding;	-	WRKY transcription factor 9
Solyc06g075140.3	2.68808	12.8332	4.7741	2.25523	0.0423845	1	GO:0006355;GO:0008270;GO:0043565	-	virNOG01002;virNOG23353	K	sp|Q6DBP8|GAT11_ARATH GATA transcription factor 11 OS=Arabidopsis thaliana GN=GATA11 PE=2 SV=1	gi|723707399|ref|XP_004242094.2| PREDICTED: GATA transcription factor 11-like [Solanum lycopersicum]	GO:0006355//regulation of transcription, DNA-templated;	-	GO:0008270//zinc ion binding;GO:0043565//sequence-specific DNA binding;	-	GATA transcription factor 8 (AHRD V3.3 A0A2G2WNP8_CAPBA)
Solyc01g073780.2	237.069	605.412	2.55373	1.35261	0.0428643	1	-	-	euNOG36816;virNOG21644;virNOG32333	R	-	gi|723659459|ref|XP_010322058.1| PREDICTED: uncharacterized protein LOC104647902 [Solanum lycopersicum]	-	-	-	-	Cysteine/Histidine-rich C1 domain family protein (AHRD V3.3 Q9SL28_ARATH)
Solyc09g008270.3	34.2612	87.6347	2.55784	1.35493	0.042978	1	-	-	virNOG01692	S	-	gi|460402239|ref|XP_004246621.1| PREDICTED: uncharacterized protein LOC101260668 [Solanum lycopersicum]	-	-	-	-	translation initiation factor (AHRD V3.3 AT2G36885.1)
Solyc04g076640.3	2.16751	11.2344	5.18312	2.37382	0.0430774	1	-	K18195	-	-	-	-	-	-	-	-	Rhamnogalacturonate lyase (AHRD V3.3 A0A200QXQ6_9MAGN)
Solyc06g054520.2	25.2873	51.9578	2.0547	1.03893	0.04359	1	GO:0003860	K05605	-	-	-	-	-	-	GO:0003860//3-hydroxyisobutyryl-CoA hydrolase activity;	ko00640(Propanoate metabolism);ko00410(beta-Alanine metabolism);ko00280(Valine, leucine and isoleucine degradation)	3-hydroxyisobutyryl-CoA hydrolase-like protein 5 (AHRD V3.3 A0A2G2YT91_CAPAN)
Solyc03g053110.3	12.0238	31.415	2.61272	1.38555	0.0436845	1	-	-	virNOG00378	P	sp|O48529|STR9_ARATH Rhodanese-like domain-containing protein 9, chloroplastic OS=Arabidopsis thaliana GN=STR9 PE=2 SV=1	gi|460377975|ref|XP_004234761.1| PREDICTED: rhodanese-like domain-containing protein 9, chloroplastic isoform X1 [Solanum lycopersicum]	-	-	-	-	Rhodanese-like domain-containing protein 9, chloroplastic (AHRD V3.3 A0A1U8G2H7_CAPAN)
Solyc08g081890.4	267.24	601.851	2.2521	1.17127	0.0438411	1	GO:0005524;GO:0016887	-	-	-	-	-	-	-	GO:0005524//ATP binding;GO:0016887//ATP hydrolysis activity;	-	ABC transporter C family member 10 (AHRD V3.3 A0A1U8GDT9_CAPAN)
Solyc09g010990.3	30.2619	61.5311	2.03329	1.02381	0.043917	1	GO:0005507;GO:0016491;GO:0055114	K05909	virNOG09759;virNOG33073	Q	sp|Q9FJD5|LAC17_ARATH Laccase-17 OS=Arabidopsis thaliana GN=LAC17 PE=2 SV=1	gi|460401843|ref|XP_004246425.1| PREDICTED: laccase-17-like [Solanum lycopersicum]	GO:0055114//obsolete oxidation-reduction process;	-	GO:0005507//copper ion binding;GO:0016491//oxidoreductase activity;	-	Laccase (AHRD V3.3 K4CRC5_SOLLC)
Solyc01g111950.4	28.4651	63.7228	2.23863	1.16261	0.0439812	1	GO:0004672;GO:0005524;GO:0006468	-	-	-	-	-	GO:0006468//protein phosphorylation;	-	GO:0004672//protein kinase activity;GO:0005524//ATP binding;	-	Serine-threonine protein kinase, plant-type, putative (AHRD V3.3 B9SR04_RICCO)
Solyc01g102860.2	13.1295	32.2504	2.45633	1.29651	0.0443371	1	-	-	virNOG21214;braNOG08142	S	-	gi|460369099|ref|XP_004230401.1| PREDICTED: uncharacterized protein LOC101252228 [Solanum lycopersicum]	-	-	-	-	golgin family A protein (AHRD V3.3 AT1G51080.1)
Solyc10g083540.3	9.65615	26.6439	2.75927	1.46429	0.0443785	1	-	K01754	-	-	-	-	-	-	-	ko00290(Valine, leucine and isoleucine biosynthesis);ko00260(Glycine, serine and threonine metabolism)	Threonine dehydratase (AHRD V3.3 A0A1U8EAN1_CAPAN)
Solyc02g064940.1	233.381	499.349	2.13963	1.09736	0.0449734	1	-	-	virNOG06010;COG4886	SR	sp|Q8W3M4|Y4744_ARATH Uncharacterized protein At4g06744 OS=Arabidopsis thaliana GN=At4g06744 PE=2 SV=1	gi|460375301|ref|XP_004233445.1| PREDICTED: uncharacterized protein At4g06744-like [Solanum lycopersicum]	-	-	-	-	Leucine-rich repeat family protein (AHRD V3.3 G3CHK6_PONTR)
Solyc09g011810.3	0.606434	7.56625	12.4766	3.64116	0.0461416	1	-	K03841	virNOG00625	G	sp|P46275|F16P1_PEA Fructose-1,6-bisphosphatase, chloroplastic OS=Pisum sativum GN=FBP PE=1 SV=2	gi|460401720|ref|XP_004246365.1| PREDICTED: fructose-1,6-bisphosphatase, chloroplastic-like [Solanum lycopersicum]	-	-	-	ko00710(Carbon fixation in photosynthetic organisms);ko00051(Fructose and mannose metabolism);ko00030(Pentose phosphate pathway);ko00010(Glycolysis / Gluconeogenesis)	Fructose-1,6-bisphosphatase (AHRD V3.3 B6TSK5_MAIZE)
Solyc05g050240.3	19.2253	42.4306	2.20702	1.1421	0.0470897	1	-	-	virNOG26173	S	-	gi|460388867|ref|XP_004240085.1| PREDICTED: uncharacterized protein LOC101251987 [Solanum lycopersicum]	-	-	-	-	Plastid division protein PDV1 (AHRD V3.3 A0A2I0XAI8_9ASPA)
Solyc01g111270.3	26.0713	53.4008	2.04826	1.0344	0.0471297	1	GO:0005515	-	virNOG01474	S	-	gi|460370349|ref|XP_004231015.1| PREDICTED: uncharacterized protein LOC101259003 [Solanum lycopersicum] gi|723666281|ref|XP_010315365.1| PREDICTED: uncharacterized protein LOC101259003 [Solanum lycopersicum] gi|723666284|ref|XP_010315366.1| PREDICTED: uncharacterized protein LOC101259003 [Solanum lycopersicum]	-	-	GO:0005515//protein binding;	-	Armadillo repeat only 1 (AHRD V3.3 Q9SW41_ARATH)
Solyc05g052600.4	16.9961	42.3465	2.49154	1.31704	0.047928	1	-	K01100	-	-	-	-	-	-	-	ko00710(Carbon fixation in photosynthetic organisms)	Sedoheptulose-1,7-bisphosphatase, chloroplastic (AHRD V3.3 A0A1U8GZ15_CAPAN)
Solyc02g092845.1	20.5471	44.238	2.15301	1.10635	0.0482181	1	-	-	-	-	-	-	-	-	-	-	Unknown protein
Solyc01g090790.4	53.0784	117.795	2.21927	1.15009	0.0491205	1	GO:0046983	-	-	-	-	-	-	-	GO:0046983//protein dimerization activity;	-	bHLH transcription factor
Solyc05g051010.4	45.4684	108.64	2.38936	1.25662	0.0492159	1	GO:0003824;GO:0050662	-	-	-	-	-	-	-	GO:0003824//catalytic activity;GO:0050662//obsolete coenzyme binding;	-	Dihydroflavonol-4-reductase (AHRD V3.3 A0A2K3N028_TRIPR)
Solyc05g044630.3	29.4671	60.873	2.0658	1.0467	0.0492401	1	GO:0005506;GO:0016226;GO:0051536	-	virNOG02408	O	sp|Q84RQ7|NIFU3_ARATH NifU-like protein 3, chloroplastic OS=Arabidopsis thaliana GN=NIFU3 PE=2 SV=1	gi|460388994|ref|XP_004240148.1| PREDICTED: nifU-like protein 3, chloroplastic [Solanum lycopersicum] gi|460388996|ref|XP_004240149.1| PREDICTED: nifU-like protein 3, chloroplastic [Solanum lycopersicum]	GO:0016226//iron-sulfur cluster assembly;	-	GO:0005506//iron ion binding;GO:0051536//iron-sulfur cluster binding;	-	NifU-like protein 3, chloroplastic (AHRD V3.3 A0A2G3BJZ5_CAPCH)
Solyc08g080010.1	20.0467	43.6741	2.17862	1.12342	0.0494205	1	GO:0004252;GO:0006508	-	virNOG05065	O	sp|O65351|SBT17_ARATH Subtilisin-like protease SBT1.7 OS=Arabidopsis thaliana GN=SBT1.7 PE=1 SV=1	gi|723726374|ref|XP_010325680.1| PREDICTED: subtilisin-like protease [Solanum lycopersicum]	GO:0006508//proteolysis;	-	GO:0004252//serine-type endopeptidase activity;	-	Subtilisin-like protease (AHRD V3.3 Q9LWA3_SOLLC)
Solyc05g015350.4	4.90834	17.3028	3.5252	1.8177	0.0499301	1	GO:0005506;GO:0016705;GO:0020037;GO:0055114	-	-	-	-	-	GO:0055114//obsolete oxidation-reduction process;	-	GO:0005506//iron ion binding;GO:0016705//oxidoreductase activity, acting on paired donors, with incorporation or reduction of molecular oxygen;GO:0020037//heme binding;	-	Cytochrome P450 (AHRD V3.3 A0A2U1PN82_ARTAN)
