# Supplementary material for: The SlERF4-9-SlCDF1/3-SlAEC2/SlPIN5 module regulates tomato root morphogenesis
Source: Front Plant Sci. 2025 Mar 28;16:1546092. doi: 10.3389/fpls.2025.1546092 (PMC11985770; doi:10.3389/fpls.2025.1546092)
Supplement: Supplementary file 8 [file Table6.xlsx]

## Sheet: Sheet1
Table S6. 198 down-regulation DEGs in WT_vs_E31. WT, young roots of wild type tomato; 31, young roots of slerf4-9 mutant line #31
Gene ID	baseMean_WT	baseMean_E31	foldChange(E31/WT)	log2FoldChange	pval	padj	GO	KEGG	eggNOG	eggNOG_Category	Swissprot	NR	BP	CC	MF	Pathway	Description
Solyc07g025170.3	369.778	1.31743	0.00356276	-8.13279	8.51234e-51	2.21142e-46	GO:0000145;GO:0006887	-	KOG2148;virNOG04460	U	sp|Q9SX85|SEC3A_ARATH Exocyst complex component SEC3A OS=Arabidopsis thaliana GN=SEC3A PE=1 SV=1	gi|723713784|ref|XP_010323449.1| PREDICTED: exocyst complex component SEC3A-like isoform X1 [Solanum lycopersicum]	GO:0006887//exocytosis;	GO:0000145//exocyst;	-	-	Exocyst complex component SEC3A (AHRD V3.3 A0A2G3C6V7_CAPCH)
Solyc12g150108.1	155.096	0	0	-Inf	1.68491e-23	1.09431e-19	-	-	-	-	-	-	-	-	-	-	zinc finger BED domain-containing protein RICESLEEPER 2-like (AHRD V3.3 A0A2I4EGG2_9ROSI)
Solyc12g038430.3	217.875	0	0	-Inf	4.88479e-18	1.81289e-14	-	-	-	-	-	-	-	-	-	-	Transposase, Ptta/En/Spm, plant (AHRD V3.3 A0A1R3I9M9_9ROSI)
Solyc01g109010.3	59.9716	1.27898	0.0213264	-5.55122	1.4537e-12	3.77658e-09	-	-	virNOG06959	ZDU	-	gi|970000661|ref|XP_015089718.1| PREDICTED: uncharacterized protein LOC107032641 [Solanum pennellii]	-	-	-	-	phox domain-containing protein (AHRD V3.3 AT2G15900.1)
Solyc03g005760.1	1342.84	141.948	0.105707	-3.24186	3.52062e-12	7.62185e-09	-	K08912	virNOG02411	O	sp|P07369|CB2G_SOLLC Chlorophyll a-b binding protein 3C, chloroplastic OS=Solanum lycopersicum GN=CAB3C PE=3 SV=1	gi|723678681|ref|XP_010317413.1| PREDICTED: chlorophyll a-b binding protein 3A, chloroplastic-like [Solanum lycopersicum]	-	-	-	ko00196(Photosynthesis - antenna proteins)	Chlorophyll a-b binding protein, chloroplastic (AHRD V3.3 A0A2G2W7Q4_CAPBA)
Solyc06g069760.3	380.364	102.665	0.269913	-1.88943	4.59438e-09	7.02102e-06	GO:0003677;GO:0006355	-	virNOG16444;virNOG07685	KR	sp|Q8LFV3|CDF3_ARATH Cyclic dof factor 3 OS=Arabidopsis thaliana GN=CDF3 PE=1 SV=2	gi|460391959|ref|XP_004241585.1| PREDICTED: cyclic dof factor 1 [Solanum lycopersicum]	GO:0006355//regulation of transcription, DNA-templated;	-	GO:0003677//DNA binding;	-	Dof zinc finger protein (AHRD V3.3 A0A2K3MQ38_TRIPR)
Solyc08g059700.2	58.9573	4.66998	0.0792095	-3.65818	1.07686e-08	1.33218e-05	-	-	virNOG19056	S	-	gi|460399581|ref|XP_004245316.1| PREDICTED: uncharacterized protein LOC101252800 [Solanum lycopersicum]	-	-	-	-	histone acetyltransferase (AHRD V3.3 AT4G32295.1)
Solyc07g055490.4	27.6175	0	0	-Inf	2.89599e-08	3.00939e-05	GO:0005506;GO:0016705;GO:0020037;GO:0055114	-	-	-	-	-	GO:0055114//obsolete oxidation-reduction process;	-	GO:0005506//iron ion binding;GO:0016705//oxidoreductase activity, acting on paired donors, with incorporation or reduction of molecular oxygen;GO:0020037//heme binding;	-	Cytochrome (AHRD V3.3 A0A2G2Z466_CAPAN)
Solyc07g053140.3	552.486	198.421	0.359143	-1.47737	6.65888e-07	0.000467543	GO:0008270	-	virNOG23549;virNOG23008	S	sp|Q9LRM4|MIP1B_ARATH B-box domain protein 31 OS=Arabidopsis thaliana GN=MIP1B PE=2 SV=1	gi|460395710|ref|XP_004243424.1| PREDICTED: zinc finger protein CONSTANS-LIKE 4-like [Solanum lycopersicum]	-	-	GO:0008270//zinc ion binding;	-	Zinc finger protein/CONSTANS-like protein (AHRD V3.3 A0A2K3M573_TRIPR)
Solyc03g115940.4	921.325	352.86	0.382992	-1.38462	9.10363e-07	0.000622377	GO:0003677;GO:0006355	-	-	-	-	-	GO:0006355//regulation of transcription, DNA-templated;	-	GO:0003677//DNA binding;	-	Dof zinc finger protein (AHRD V3.3 A0A2K3MQ38_TRIPR)
Solyc06g050440.3	1522.53	504.563	0.331398	-1.59336	1.69284e-06	0.00102275	GO:0004601;GO:0006979;GO:0020037;GO:0055114	K00430	virNOG05361	G	sp|A7NY33|PER4_VITVI Peroxidase 4 OS=Vitis vinifera GN=GSVIVT00023967001 PE=1 SV=1	gi|460390532|ref|XP_004240883.1| PREDICTED: peroxidase P7-like [Solanum lycopersicum]	GO:0006979//response to oxidative stress;GO:0055114//obsolete oxidation-reduction process;	-	GO:0004601//peroxidase activity;GO:0020037//heme binding;	ko00940(Phenylpropanoid biosynthesis)	Peroxidase (AHRD V3.3 K4C5I8_SOLLC)
Solyc12g044190.3	43.0118	0.343939	0.00799638	-6.96644	1.86067e-06	0.0010986	GO:0043531	-	-	-	-	-	-	-	GO:0043531//ADP binding;	-	Pvr4 (AHRD V3.3 A0A1D5AHY8_CAPAN)
Solyc05g044490.3	307.377	107.278	0.349011	-1.51866	3.07855e-06	0.00170165	GO:0043531	-	-	-	-	-	-	-	GO:0043531//ADP binding;	-	Plant resistance protein (AHRD V3.3 O81136_SOLLC)
Solyc04g064770.1	55.0811	8.40451	0.152584	-2.71232	7.17077e-06	0.00358249	-	-	-	-	-	-	-	-	-	-	Zinc finger transcription factor 34
Solyc09g074380.4	979.717	126.808	0.129433	-2.94972	1.12184e-05	0.0049397	-	-	-	-	-	-	-	-	-	-	DCD (Development and Cell Death) domain protein (AHRD V3.3 F4IUS3_ARATH)
Solyc04g014770.1	28.0066	1.60585	0.0573383	-4.12436	1.44101e-05	0.00603805	-	-	-	-	-	-	-	-	-	-	Unknown protein
Solyc02g064970.4	1448.38	467.122	0.322512	-1.63257	1.86194e-05	0.00732899	GO:0004601;GO:0006979;GO:0020037;GO:0055114	K00430	-	-	-	-	GO:0006979//response to oxidative stress;GO:0055114//obsolete oxidation-reduction process;	-	GO:0004601//peroxidase activity;GO:0020037//heme binding;	ko00940(Phenylpropanoid biosynthesis)	Peroxidase (AHRD V3.3 K4B6T2_SOLLC)
Solyc07g006230.1	3031.63	1389.4	0.4583	-1.12563	2.98229e-05	0.0110681	-	-	-	-	-	-	-	-	-	-	Unknown protein
Solyc03g025350.3	700.51	307.31	0.438694	-1.18871	3.50993e-05	0.0124879	GO:0016021;GO:0055085	-	virNOG00855	P	sp|Q10SY9|LSI2_ORYSJ Silicon efflux transporter LSI2 OS=Oryza sativa subsp. japonica GN=LSI2 PE=1 SV=1	gi|460377280|ref|XP_004234421.1| PREDICTED: putative transporter arsB [Solanum lycopersicum] gi|723679768|ref|XP_010317628.1| PREDICTED: putative transporter arsB [Solanum lycopersicum]	GO:0055085//transmembrane transport;	GO:0016021//integral component of membrane;	-	-	Transporter arsB (AHRD V3.3 A0A2U1Q5Y3_ARTAN)
Solyc10g005030.4	434.121	65.9963	0.152023	-2.71764	3.55182e-05	0.0124879	GO:0005515	K12130	-	-	-	-	-	-	GO:0005515//protein binding;	ko04712(Circadian rhythm - plant)	Two-component response regulator-like APRR5 (AHRD V3.3 A0A1U8EDA4_CAPAN)
Solyc03g121900.1	132.061	33.7312	0.255421	-1.96905	3.6052e-05	0.0124879	-	-	virNOG24842	R	sp|Q8W453|DIRL1_ARATH Putative lipid-transfer protein DIR1 OS=Arabidopsis thaliana GN=DIR1 PE=1 SV=1	gi|723684874|ref|XP_010318493.1| PREDICTED: putative lipid-transfer protein DIR1 [Solanum lycopersicum]	-	-	-	-	Bifunctional inhibitor/plant lipid transfer protein/seed storage helical domain containing protein (AHRD V3.3 A0A2P5DNS6_PARAD)
Solyc05g054470.3	161.536	56.6338	0.350596	-1.51212	3.70666e-05	0.0126704	-	-	-	-	-	gi|971548006|ref|XP_006346014.2| PREDICTED: uncharacterized protein LOC102599036 isoform X1 [Solanum tuberosum]	-	-	-	-	Unknown protein
Solyc07g054220.1	155.666	46.7607	0.300391	-1.73509	5.37972e-05	0.0172543	GO:0003700;GO:0006355	K09286	virNOG07969	K	sp|Q9M0J3|ERF54_ARATH Ethylene-responsive transcription factor ERF054 OS=Arabidopsis thaliana GN=ERF054 PE=2 SV=1	gi|460395537|ref|XP_004243339.1| PREDICTED: ethylene-responsive transcription factor ERF054 [Solanum lycopersicum]	GO:0006355//regulation of transcription, DNA-templated;	-	GO:0003700//DNA-binding transcription factor activity;	-	Ethylene-responsive transcription factor (AHRD V3.3 A0A2G3C0R2_CAPCH)
Solyc02g062890.3	185.186	71.1174	0.384033	-1.3807	0.000109462	0.0312497	GO:0016021;GO:0022857;GO:0055085	-	-	-	-	-	GO:0055085//transmembrane transport;	GO:0016021//integral component of membrane;	GO:0022857//transmembrane transporter activity;	-	polyol monosaccharide transporter 5
Solyc07g007930.3	8235.01	4107.51	0.498786	-1.00351	0.000111154	0.0313876	-	K06617	virNOG03519	R	sp|Q8RX87|RFS6_ARATH Probable galactinol--sucrose galactosyltransferase 6 OS=Arabidopsis thaliana GN=RFS6 PE=2 SV=2	gi|723712740|ref|XP_004242758.2| PREDICTED: probable galactinol--sucrose galactosyltransferase 6 isoform X1 [Solanum lycopersicum]	-	-	-	ko00052(Galactose metabolism)	Raffinose synthase family protein (AHRD V3.3 F4K470_ARATH)
Solyc04g082220.3	233.439	94.5007	0.404821	-1.30465	0.000129065	0.0340217	-	-	-	-	-	-	-	-	-	-	Lysine histidine transporter-like 8 (AHRD V3.3 A0A2G2X1G9_CAPBA)
Solyc01g096630.3	110.429	27.1683	0.246025	-2.02313	0.000140802	0.0352135	-	-	virNOG22463	S	sp|Q9LHH5|LNK3_ARATH Protein LNK3 OS=Arabidopsis thaliana GN=LNK3 PE=1 SV=1	gi|350536553|ref|NP_001234764.1| ACI112 protein [Solanum lycopersicum] gi|68449766|gb|AAY97870.1| ACI112 [Solanum lycopersicum]	-	-	-	-	Cilia-and flagella-associated protein 20 (AHRD V3.3 A0A2G2YYL7_CAPAN)
Solyc08g013950.1	45.2161	1.95692	0.0432792	-4.53018	0.00016584	0.0395262	-	-	-	-	-	-	-	-	-	-	Unknown protein
Solyc10g086380.1	212.343	64.6631	0.304522	-1.71538	0.000277374	0.0600491	-	K14494	virNOG02726	K	sp|Q7Y1B6|GAI_SOLLC DELLA protein GAI OS=Solanum lycopersicum GN=GAI PE=2 SV=1	gi|723739916|ref|XP_004249633.2| PREDICTED: DELLA protein GAI-like [Solanum lycopersicum]	-	-	-	ko04075(Plant hormone signal transduction)	Transcription factor GRAS (AHRD V3.3 A0A200PU13_9MAGN)
Solyc01g105300.4	156.733	37.1338	0.236924	-2.07751	0.000298819	0.0613432	-	K22684	-	-	-	-	-	-	-	-	Metacaspase-1 (AHRD V3.3 A0A2G2VS93_CAPBA),Pfam:PF00656
Solyc07g008440.3	95.9075	30.693	0.320027	-1.64374	0.000304607	0.0613432	-	-	virNOG10208	G	sp|Q9FZ95|PUP3_ARATH Purine permease 3 OS=Arabidopsis thaliana GN=PUP3 PE=2 SV=1	gi|460394408|ref|XP_004242795.1| PREDICTED: purine permease 3-like [Solanum lycopersicum]	-	-	-	-	Purine permease (AHRD V3.3 A0A2R6QYE6_ACTCH),Pfam:PF16913
Solyc03g046200.1	22.1668	1.99818	0.0901427	-3.47164	0.000306964	0.0613432	-	K01180	virNOG09840	G	sp|D4AZ24|ENG1_ARTBC Probable endo-1,3(4)-beta-glucanase ARB_01444 OS=Arthroderma benhamiae (strain ATCC MYA-4681 / CBS 112371) GN=ARB_01444 PE=1 SV=1	gi|460377835|ref|XP_004234692.1| PREDICTED: putative endo-1,3(4)-beta-glucanase 2 [Solanum lycopersicum]	-	-	-	-	Beta-glucan-binding protein 1 (AHRD V3.3 A0EJF0_MEDTR)
Solyc12g005660.2	137.261	38.3162	0.279148	-1.8409	0.00035101	0.0675472	GO:0008270	-	virNOG23549;virNOG23008	S	sp|Q1G3I2|MIP1A_ARATH B-box domain protein 30 OS=Arabidopsis thaliana GN=MIP1A PE=1 SV=1	gi|525314355|ref|NP_001266001.1| Hop-interacting protein THI121 [Solanum lycopersicum] gi|365222932|gb|AEW69818.1| Hop-interacting protein THI121 [Solanum lycopersicum]	-	-	GO:0008270//zinc ion binding;	-	Zinc finger protein/CONSTANS-like protein (AHRD V3.3 A0A2K3M573_TRIPR)
Solyc03g025230.3	308.883	140.861	0.456034	-1.13279	0.000454161	0.0842761	GO:0006855;GO:0015238;GO:0015297;GO:0016020;GO:0055085	K03327	virNOG00591;COG0534	SV	sp|F4JTB3|DTX35_ARATH Protein DETOXIFICATION 35 OS=Arabidopsis thaliana GN=DTX35 PE=1 SV=1	gi|460377302|ref|XP_004234432.1| PREDICTED: protein TRANSPARENT TESTA 12-like [Solanum lycopersicum]	GO:0006855//xenobiotic transmembrane transport;GO:0055085//transmembrane transport;	GO:0016020//membrane;	GO:0015297//antiporter activity;	-	Protein DETOXIFICATION (AHRD V3.3 Q6V7U8_SOLLC)
Solyc01g099990.3	65.0807	11.9664	0.18387	-2.44324	0.000486384	0.0888955	GO:0005515	-	virNOG33113;virNOG15018	R	sp|O80494|P2B15_ARATH F-box protein PP2-B15 OS=Arabidopsis thaliana GN=PP2B15 PE=2 SV=2	gi|460368825|ref|XP_004230265.1| PREDICTED: F-box protein PP2-B15 [Solanum lycopersicum]	-	-	GO:0005515//protein binding;	-	F-box domain, Phloem protein 2-like protein (AHRD V3.3 A0A2U1KKL5_ARTAN)
Solyc04g009050.4	852.358	198.442	0.232816	-2.10274	0.000569313	0.0996358	-	-	-	-	-	-	-	-	-	-	agglutinin-like protein (AHRD V3.3 AT3G54500.7)
Solyc02g082060.2	265.441	113.914	0.429149	-1.22045	0.000601932	0.10193	-	K22763	virNOG03011;KOG0324	S	sp|Q93VG8|PPDEX_ARATH DeSI-like protein At4g17486 OS=Arabidopsis thaliana GN=At4g17486 PE=2 SV=1	gi|460373616|ref|XP_004232611.1| PREDICTED: deSI-like protein At4g17486 [Solanum lycopersicum]	-	-	-	-	PPPDE putative thiol peptidase family protein (AHRD V3.3 A0A2U1M5H1_ARTAN)
Solyc02g071360.4	141.686	57.3742	0.404939	-1.30422	0.000626316	0.102089	GO:0016491;GO:0055114	-	-	-	-	-	GO:0055114//obsolete oxidation-reduction process;	-	GO:0016491//oxidoreductase activity;	-	2-oxoglutarate (2OG) and Fe(II)-dependent oxygenase superfamily protein (AHRD V3.3 F4I629_ARATH)
Solyc09g010000.4	69.2002	21.7196	0.313867	-1.67178	0.000751557	0.109689	GO:0016491;GO:0055114	-	-	-	-	-	GO:0055114//obsolete oxidation-reduction process;	-	GO:0016491//oxidoreductase activity;	-	2-oxoglutarate (2OG) and Fe(II)-dependent oxygenase superfamily protein (AHRD V3.3 A0A2U1NTU8_ARTAN)
Solyc04g011480.3	136.989	55.8968	0.408039	-1.29322	0.000759713	0.11026	-	-	virNOG23557;virNOG25564	S	sp|A1XGB4|PIMP1_CAPAN CASP-like protein PIMP1 OS=Capsicum annuum GN=PIMP1 PE=2 SV=1	gi|460382045|ref|XP_004236750.1| PREDICTED: CASP-like protein PIMP1 [Solanum lycopersicum]	-	-	-	-	CASP-like protein (AHRD V3.3 A0A2G2ZG68_CAPAN)
Solyc01g150136.1	15.1401	0.646617	0.042709	-4.54932	0.000821829	0.117223	-	-	-	-	-	-	-	-	-	-	Unknown protein
Solyc04g015610.3	296.233	144.87	0.489039	-1.03198	0.00122913	0.155007	-	-	virNOG10319	R	-	gi|460381769|ref|XP_004236614.1| PREDICTED: uncharacterized protein LOC101245348 [Solanum lycopersicum]	-	-	-	-	DUF642 domain-containing protein (AHRD V3.3 A0A1Q3AUQ6_CEPFO)
Solyc10g083400.1	266.613	129.606	0.486121	-1.04061	0.00136708	0.165734	GO:0005506;GO:0016705;GO:0020037;GO:0055114	K20624	virNOG08478	Q	sp|Q9ZUX1|C94C1_ARATH Cytochrome P450 94C1 OS=Arabidopsis thaliana GN=CYP94C1 PE=1 SV=1	gi|460408018|ref|XP_004249445.1| PREDICTED: cytochrome P450 94C1-like [Solanum lycopersicum]	GO:0055114//obsolete oxidation-reduction process;	-	GO:0005506//iron ion binding;GO:0016705//oxidoreductase activity, acting on paired donors, with incorporation or reduction of molecular oxygen;GO:0020037//heme binding;	-	Cytochrome P450 (AHRD V3.3 A0A200Q6A4_9MAGN)
Solyc02g070940.1	85.5385	31.2584	0.36543	-1.45233	0.00147893	0.173852	-	K08912	virNOG02411	O	sp|P07370|CB2B_SOLLC Chlorophyll a-b binding protein 1B, chloroplastic OS=Solanum lycopersicum GN=CAB1B PE=3 SV=1	gi|460374596|ref|XP_004233096.1| PREDICTED: chlorophyll a-b binding protein 1C, chloroplastic [Solanum lycopersicum] gi|460374602|ref|XP_004233099.1| PREDICTED: chlorophyll a-b binding protein 1C, chloroplastic [Solanum lycopersicum] gi|460374604|ref|XP_004233100.1| PREDICTED: chlorophyll a-b binding protein 1C, chloroplastic [Solanum lycopersicum] gi|723675650|ref|XP_010316910.1| PREDICTED: chlo…	-	-	-	ko00196(Photosynthesis - antenna proteins)	Chlorophyll a-b binding protein, chloroplastic (AHRD V3.3 A0A2G3A7J8_CAPAN)
Solyc07g065500.2	228.959	112.011	0.48922	-1.03145	0.00155469	0.181934	-	K08065	virNOG19243	K	sp|O23310|NFYB3_ARATH Nuclear transcription factor Y subunit B-3 OS=Arabidopsis thaliana GN=NFYB3 PE=1 SV=1	gi|460397021|ref|XP_004244067.1| PREDICTED: nuclear transcription factor Y subunit B-3-like [Solanum lycopersicum]	-	-	-	-	Nuclear transcription factor Y subunit B-3 (AHRD V3.3 A0A2G2WFH7_CAPBA)
Solyc01g105120.4	2890.7	548.372	0.189702	-2.39819	0.00185797	0.204166	-	-	-	-	-	-	-	-	-	-	protein LNK1 (AHRD V3.3 A0A2I4GGH4_9ROSI)
Solyc07g009520.2	62.1096	20.7747	0.334484	-1.57999	0.00186255	0.204166	-	-	virNOG12141;virNOG07848	S	sp|F4I8B9|Y1501_ARATH Putative WEB family protein At1g65010, chloroplastic OS=Arabidopsis thaliana GN=At1g65010 PE=1 SV=1	gi|460394945|ref|XP_004243050.1| PREDICTED: WEB family protein At4g27595, chloroplastic-like isoform X2 [Solanum lycopersicum]	-	-	-	-	WEB family protein At4g27595, chloroplastic-like (AHRD V3.3 A0A2I4GYN3_9ROSI)
Solyc01g065700.3	971.342	301.817	0.310722	-1.6863	0.00206183	0.22043	GO:0003824	-	virNOG06453;COG0631	T	sp|Q0WRB2|P2C73_ARATH Probable protein phosphatase 2C 73 OS=Arabidopsis thaliana GN=PPC6-7 PE=2 SV=1	gi|460366820|ref|XP_004229276.1| PREDICTED: probable protein phosphatase 2C 34 [Solanum lycopersicum] gi|723658369|ref|XP_010321558.1| PREDICTED: probable protein phosphatase 2C 34 [Solanum lycopersicum]	-	-	GO:0003824//catalytic activity;	-	Protein phosphatase 2C family protein (AHRD V3.3 A0A2U1N538_ARTAN)
Solyc01g068560.3	297.903	83.1838	0.279231	-1.84047	0.00230512	0.238265	-	-	virNOG26071;virNOG08468	S	-	gi|723657724|ref|XP_010320656.1| PREDICTED: uncharacterized protein LOC101268608 [Solanum lycopersicum] gi|723657727|ref|XP_010320660.1| PREDICTED: uncharacterized protein LOC101268608 [Solanum lycopersicum]	-	-	-	-	protein LNK2 isoform X1 (AHRD V3.3 XP_023879322.1)
Solyc08g080700.3	35.5148	8.40883	0.23677	-2.07844	0.00239915	0.242519	-	-	-	-	-	-	-	-	-	-	NEP-interacting protein, putative (DUF239) (AHRD V3.3 Q1PE81_ARATH)
Solyc10g086520.2	342.624	75.023	0.218966	-2.19122	0.00241833	0.24297	-	-	-	-	sp|O80932|EXPA3_ARATH Expansin-A3 OS=Arabidopsis thaliana GN=EXPA3 PE=2 SV=1	gi|460408402|ref|XP_004249634.1| PREDICTED: expansin-A3 [Solanum lycopersicum]	-	-	-	-	expansin 6
Solyc04g082120.3	292.042	60.1582	0.205991	-2.27935	0.00253262	0.252088	GO:0004252;GO:0070008	K01322	virNOG09334;COG1505	OE	sp|Q9QUR6|PPCE_MOUSE Prolyl endopeptidase OS=Mus musculus GN=Prep PE=1 SV=1	gi|460385425|ref|XP_004238404.1| PREDICTED: prolyl endopeptidase-like [Solanum lycopersicum]	-	-	GO:0004252//serine-type endopeptidase activity;GO:0070008//serine-type exopeptidase activity;	-	Prolyl oligopeptidase (AHRD V3.3 H2D7F1_COFAR)
Solyc12g098900.2	29.1626	6.05005	0.207459	-2.2691	0.00257824	0.255649	-	-	virNOG27215	S	sp|P13940|LEA29_GOSHI Late embryogenesis abundant protein D-29 OS=Gossypium hirsutum PE=3 SV=1	gi|460415216|ref|XP_004252956.1| PREDICTED: late embryogenesis abundant protein D-29 [Solanum lycopersicum]	-	-	-	-	Late embryogenesis abundant protein D-29 (AHRD V3.3 A0A2G3B563_CAPCH)
Solyc01g150166.1	431.337	172.977	0.401024	-1.31824	0.00260252	0.255795	-	-	-	-	-	-	-	-	-	-	Unknown protein
Solyc02g084780.4	3057.83	1308.58	0.427943	-1.22451	0.00282382	0.270661	GO:0004601;GO:0006979;GO:0020037;GO:0055114	K00430	-	-	-	-	GO:0006979//response to oxidative stress;GO:0055114//obsolete oxidation-reduction process;	-	GO:0004601//peroxidase activity;GO:0020037//heme binding;	ko00940(Phenylpropanoid biosynthesis)	Peroxidase (AHRD V3.3 K4BAZ3_SOLLC)
Solyc03g083130.3	96.4867	38.9328	0.403505	-1.30934	0.00291811	0.274672	-	K23113	-	-	-	-	-	-	-	-	Protein DEFECTIVE IN MERISTEM SILENCING 3 (AHRD V3.3 A0A1J3I4J6_NOCCA)
Solyc04g008230.3	154.337	72.2222	0.467953	-1.09557	0.00305167	0.282133	GO:0004650;GO:0005975	-	virNOG04490	R	sp|Q949Z1|PGLR4_ARATH Polygalacturonase At1g48100 OS=Arabidopsis thaliana GN=At1g48100 PE=2 SV=1	gi|970026198|ref|XP_015074404.1| PREDICTED: polygalacturonase At1g48100 [Solanum pennellii]	GO:0005975//carbohydrate metabolic process;	-	GO:0004650//polygalacturonase activity;	-	Pectin lyase-like superfamily protein (AHRD V3.3 A0A2U1PE89_ARTAN)
Solyc07g055560.4	35.8927	9.222	0.256933	-1.96054	0.00325284	0.295711	GO:0005506;GO:0016705;GO:0020037;GO:0055114	-	-	-	-	-	GO:0055114//obsolete oxidation-reduction process;	-	GO:0005506//iron ion binding;GO:0016705//oxidoreductase activity, acting on paired donors, with incorporation or reduction of molecular oxygen;GO:0020037//heme binding;	-	Cytochrome (AHRD V3.3 A0A2G3C1F9_CAPCH)
Solyc06g061240.4	1837.08	909.392	0.495021	-1.01444	0.0032685	0.295862	-	-	-	-	-	-	-	-	-	-	PLATZ transcription factor family protein (AHRD V3.3 F4IEB6_ARATH)
Solyc07g065960.1	198.4	80.609	0.406295	-1.2994	0.00350452	0.312865	-	-	virNOG25411;virNOG24376	O	sp|Q9FYB5|DNJ11_ARATH Chaperone protein dnaJ 11, chloroplastic OS=Arabidopsis thaliana GN=ATJ11 PE=1 SV=2	gi|460396914|ref|XP_004244015.1| PREDICTED: chaperone protein dnaJ 11, chloroplastic-like [Solanum lycopersicum]	-	-	-	-	Chaperone protein DnaJ (AHRD V3.3 A0A2G3C2H4_CAPCH)
Solyc02g093580.4	454.982	212.851	0.467823	-1.09597	0.00354725	0.314518	-	K01728	-	-	-	-	-	-	-	ko00040(Pentose and glucuronate interconversions)	Tomato 9612 mRNA
Solyc04g057790.1	77.6926	30.3292	0.390374	-1.35707	0.0036701	0.321028	GO:0046983	-	-	-	-	-	-	-	GO:0046983//protein dimerization activity;	-	Zinc finger BED domain-containing protein RICESLEEPER 2 (AHRD V3.3 A0A2U1Q290_ARTAN)
Solyc12g062200.1	13.3219	0.653745	0.0490728	-4.34893	0.00410057	0.341893	-	-	-	-	-	-	-	-	-	-	Unknown protein
Solyc01g080570.4	915.015	449.427	0.491169	-1.02571	0.00428485	0.348954	-	-	-	-	-	-	-	-	-	-	Inosine-uridine preferring nucleoside hydrolase family protein (AHRD V3.3 A0A2U1LEG5_ARTAN)
Solyc02g082740.1	126.329	59.8894	0.474074	-1.07682	0.00443487	0.356698	-	-	virNOG18187	R	sp|Q9C523|DIR19_ARATH Dirigent protein 19 OS=Arabidopsis thaliana GN=DIR19 PE=2 SV=1	gi|976924804|gb|KVI08737.1| Plant disease resistance response protein [Cynara cardunculus var. scolymus]	-	-	-	-	Dirigent protein (AHRD V3.3 K4BAE4_SOLLC)
Solyc01g100490.4	743.224	305.622	0.411211	-1.28205	0.00449892	0.358991	GO:0030410;GO:0030418	K05953	-	-	-	-	GO:0030418//nicotianamine biosynthetic process;	-	GO:0030410//nicotianamine synthase activity;	ko00997(Biosynthesis of various secondary metabolites - part 3);ko00270(Cysteine and methionine metabolism)	chloronerva
Solyc01g073860.3	86.3419	24.4541	0.283224	-1.81999	0.00457474	0.361989	-	-	virNOG32333;NOG161537	SR	-	gi|460366962|ref|XP_004229344.1| PREDICTED: uncharacterized protein LOC101249575 [Solanum lycopersicum]	-	-	-	-	Cysteine/Histidine-rich C1 domain family protein (AHRD V3.3 Q9SL28_ARATH)
Solyc05g012230.4	116.08	43.7638	0.377013	-1.40731	0.00463593	0.363002	-	-	-	-	-	-	-	-	-	-	hypothetical protein (AHRD V3.3 AT5G61040.1)
Solyc12g094610.3	24.5623	4.93571	0.200947	-2.31511	0.00541324	0.402213	GO:0005515	-	-	-	-	-	-	-	GO:0005515//protein binding;	-	RING-type E3 ubiquitin transferase (AHRD V3.3 A0A1U8F899_CAPAN)
Solyc09g072610.3	179.952	81.1556	0.450984	-1.14885	0.00567511	0.41298	GO:0016614;GO:0055114	K17756	virNOG01712	R	sp|B5WWZ8|FAO1_LOTJA Long-chain-alcohol oxidase FAO1 OS=Lotus japonicus GN=FAO1 PE=1 SV=1	gi|460404091|ref|XP_004247518.1| PREDICTED: long-chain-alcohol oxidase FAO2-like [Solanum lycopersicum]	GO:0055114//obsolete oxidation-reduction process;	-	GO:0016614//oxidoreductase activity, acting on CH-OH group of donors;	-	Long-chain-alcohol oxidase (AHRD V3.3 A0A2G2X4S2_CAPBA)
Solyc01g109390.3	1287.13	488.481	0.379513	-1.39778	0.00587869	0.423952	-	-	virNOG24842	R	sp|Q8W453|DIRL1_ARATH Putative lipid-transfer protein DIR1 OS=Arabidopsis thaliana GN=DIR1 PE=1 SV=1	gi|460370287|ref|XP_004230985.1| PREDICTED: putative lipid-transfer protein DIR1 [Solanum lycopersicum]	-	-	-	-	Bifunctional inhibitor/lipid-transfer protein/seed storage 2S albumin superfamily protein (AHRD V3.3 Q8GXG3_ARATH)
Solyc07g053130.4	48.5015	8.96339	0.184807	-2.43591	0.00618178	0.441199	GO:0004672;GO:0006468	-	-	-	-	-	GO:0006468//protein phosphorylation;	-	GO:0004672//protein kinase activity;	-	G-type lectin S-receptor-like serine/threonine-protein kinase (AHRD V3.3 A0A2G2Z3R4_CAPAN)
Solyc02g084650.3	218.61	107.839	0.493294	-1.01948	0.00632757	0.447788	-	-	virNOG26551	S	-	gi|460373286|ref|XP_004232452.1| PREDICTED: uncharacterized protein LOC101247385 [Solanum lycopersicum]	-	-	-	-	UPF0651 protein, mitochondrial (AHRD V3.3 A0A2G3D7Z0_CAPCH)
Solyc10g017630.3	25.9682	5.84937	0.225251	-2.15039	0.006431	0.451505	GO:0003700;GO:0005634;GO:0006355	-	-	-	-	-	GO:0006355//regulation of transcription, DNA-templated;	GO:0005634//nucleus;	GO:0003700//DNA-binding transcription factor activity;	-	MADS-box protein (AHRD V3.3 A1BQ41_VITVI)
Solyc12g009130.3	30.5544	7.7058	0.2522	-1.98736	0.00715681	0.475422	-	-	-	-	-	-	-	-	-	-	Protein LURP-one-related 6 (AHRD V3.3 A0A2G2YV39_CAPAN)
Solyc01g006790.3	111.886	53.5421	0.47854	-1.06329	0.00781781	0.492958	-	-	-	-	-	-	-	-	-	-	hypothetical protein (AHRD V3.3 AT2G27180.1)
Solyc07g006630.4	313.295	16.1302	0.0514856	-4.27969	0.00872294	0.526091	GO:0005515	-	-	-	-	-	-	-	GO:0005515//protein binding;	-	Zinc finger protein CONSTANS-like 5-like (AHRD V3.3 A0A2K3N2C5_TRIPR)
Solyc02g086530.4	36.4238	1.6685	0.0458078	-4.44826	0.00906684	0.541488	-	K06617	-	-	-	-	-	-	-	ko00052(Galactose metabolism)	Raffinose synthase (AHRD V3.3 G5DF09_9LAMI)
Solyc05g052100.3	42.3649	13.3393	0.314867	-1.66718	0.00909126	0.541701	GO:0006520;GO:0016491;GO:0055114	-	virNOG05449;COG0334	E	sp|O04937|DHEA_NICPL Glutamate dehydrogenase A OS=Nicotiana plumbaginifolia GN=GDHA PE=2 SV=1	gi|970027279|ref|XP_015074944.1| PREDICTED: glutamate dehydrogenase A-like [Solanum pennellii]	GO:0006520//cellular amino acid metabolic process;GO:0055114//obsolete oxidation-reduction process;	-	GO:0016491//oxidoreductase activity;	-	Glutamate dehydrogenase (AHRD V3.3 A0A1U8GQ51_CAPAN)
Solyc03g096260.3	7.40689	0	0	-Inf	0.00930409	0.548267	-	-	-	-	-	-	-	-	-	-	Protein yippee-like (AHRD V3.3 A0A1U8GAE4_CAPAN)
Solyc02g068660.3	66.9384	19.362	0.28925	-1.78961	0.00977206	0.565408	GO:0004672;GO:0005524;GO:0006468	-	-	-	-	-	GO:0006468//protein phosphorylation;	-	GO:0004672//protein kinase activity;GO:0005524//ATP binding;	-	wall-associated receptor kinase-like 10 (AHRD V3.3 A0A2I4G978_9ROSI)
Solyc09g072810.3	296.558	129.56	0.436878	-1.1947	0.0100526	0.577779	GO:0004672;GO:0005524;GO:0006468	-	virNOG06621	T	sp|Q8VZG8|MIK2_ARATH MDIS1-interacting receptor like kinase 2 OS=Arabidopsis thaliana GN=MIK2 PE=1 SV=3	gi|460404056|ref|XP_004247501.1| PREDICTED: probable LRR receptor-like serine/threonine-protein kinase At4g08850 [Solanum lycopersicum]	GO:0006468//protein phosphorylation;	-	GO:0004672//protein kinase activity;GO:0005524//ATP binding;	-	Receptor protein kinase, putative (AHRD V3.3 B9SKP2_RICCO)
Solyc03g115040.4	52.0868	19.7016	0.378245	-1.40261	0.0102137	0.581892	-	-	-	-	-	-	-	-	-	-	Eukaryotic aspartyl protease family protein (AHRD V3.3 A0A2U1KXX4_ARTAN)
Solyc07g007250.4	86.0428	22.2369	0.258439	-1.9521	0.0120049	0.632384	-	-	-	-	-	-	-	-	-	-	Metallocarboxypeptidase inhibitor (AHRD V3.3 A0A2G3BXM1_CAPCH)
Solyc03g113960.4	108.634	44.6409	0.41093	-1.28303	0.012025	0.632384	GO:0005516	-	-	-	-	-	-	-	GO:0005516//calmodulin binding;	-	Calmodulin binding protein-like (AHRD V3.3 A0A200QLB3_9MAGN)
Solyc06g005110.3	180.232	77.2809	0.428787	-1.22167	0.0123729	0.646751	GO:0003735;GO:0005840;GO:0006412	-	virNOG13095	J	sp|P46297|RS23_FRAAN 40S ribosomal protein S23 OS=Fragaria ananassa GN=RPS23 PE=2 SV=1	gi|297741557|emb|CBI32689.3| unnamed protein product [Vitis vinifera]	GO:0006412//translation;	GO:0005840//ribosome;	GO:0003735//structural constituent of ribosome;	-	40S ribosomal protein S23 (AHRD V3.3 A0A2I4EYK6_9ROSI)
Solyc02g082960.3	164.245	69.3134	0.422013	-1.24464	0.0126282	0.654688	GO:0004568;GO:0006032;GO:0016998	-	virNOG01205;COG3979	G	sp|Q05537|CHID_SOLLC Basic endochitinase (Fragment) OS=Solanum lycopersicum GN=CHI14 PE=2 SV=1	gi|970008698|ref|XP_015065219.1| PREDICTED: basic endochitinase-like [Solanum pennellii]	GO:0006032//chitin catabolic process;GO:0016998//cell wall macromolecule catabolic process;	-	GO:0004568//chitinase activity;	-	Chitinase (AHRD V3.3 Q9FS45_VITVI)
Solyc01g015080.3	2029.81	902.426	0.444587	-1.16946	0.0128982	0.660624	GO:0004601;GO:0006979;GO:0020037;GO:0055114	K00430	virNOG08514	G	sp|Q42517|PERN_ARMRU Peroxidase N OS=Armoracia rusticana GN=HRPN PE=2 SV=1	gi|460364898|ref|XP_004228346.1| PREDICTED: peroxidase N-like [Solanum lycopersicum]	GO:0006979//response to oxidative stress;GO:0055114//obsolete oxidation-reduction process;	-	GO:0004601//peroxidase activity;GO:0020037//heme binding;	ko00940(Phenylpropanoid biosynthesis)	Peroxidase (AHRD V3.3 K4AUE2_SOLLC)
Solyc09g011060.2	86.6992	41.6549	0.480454	-1.05753	0.013143	0.666881	GO:0004672;GO:0005524;GO:0006468	-	virNOG00169	T	sp|O80939|LRK41_ARATH L-type lectin-domain containing receptor kinase IV.1 OS=Arabidopsis thaliana GN=LECRK41 PE=2 SV=1	gi|914726381|gb|AKV93711.1| clade IV lectin receptor kinase [Solanum lycopersicum]	GO:0006468//protein phosphorylation;	-	GO:0004672//protein kinase activity;GO:0005524//ATP binding;	-	Lectin receptor kinase (AHRD V3.3 B8XSM9_WHEAT)
Solyc08g068990.2	57.132	24.1899	0.423403	-1.2399	0.0138216	0.680656	-	-	virNOG22343	S	sp|Q40374|PR1_MEDTR Pathogenesis-related protein PR-1 OS=Medicago truncatula GN=PR-1 PE=2 SV=1	gi|460399807|ref|XP_004245428.1| PREDICTED: pathogenesis-related protein PRB1-3 [Solanum lycopersicum]	-	-	-	-	Pathogenesis-related protein 1 (AHRD V3.3 A0A2K3L121_TRIPR)
Solyc08g061060.3	52.9722	5.00117	0.0944111	-3.4049	0.0138901	0.680656	-	-	-	-	-	-	-	-	-	-	EG45-like domain containing protein (AHRD V3.3 A0A2K3LKU5_TRIPR)
Solyc06g060230.3	1358.46	660.94	0.486538	-1.03938	0.0143131	0.683702	GO:0003677;GO:0006355	-	virNOG09836	K	sp|Q39013|NAC2_ARATH NAC domain-containing protein 2 OS=Arabidopsis thaliana GN=NAC002 PE=2 SV=2	gi|350535899|ref|NP_001234219.1| Nam-like protein 1 [Solanum lycopersicum] gi|195549547|gb|ACG50001.1| Nam-like protein 1 [Solanum lycopersicum] gi|283580277|gb|ADB27957.1| Nam-like protein 1 [Solanum lycopersicum]	GO:0006355//regulation of transcription, DNA-templated;	-	GO:0003677//DNA binding;	-	NAC domain-containing protein (AHRD V3.3 A0A2K3N804_TRIPR)
Solyc10g006750.4	72.2692	24.4258	0.337983	-1.56498	0.0145819	0.686628	-	-	-	-	-	-	-	-	-	-	Unknown protein
Solyc01g106470.3	510.779	163.375	0.319855	-1.64451	0.0151328	0.702028	-	-	virNOG06288	R	-	gi|460369628|ref|XP_004230659.1| PREDICTED: uncharacterized protein LOC101254738 [Solanum lycopersicum]	-	-	-	-	Tunicamycin induced protein (AHRD V3.3 Q84JN2_ARATH)
Solyc04g071890.3	2656.99	1216.2	0.457734	-1.12742	0.0157947	0.715254	GO:0004601;GO:0006979;GO:0020037;GO:0055114	K00430	virNOG09000	G	sp|Q96520|PER12_ARATH Peroxidase 12 OS=Arabidopsis thaliana GN=PER12 PE=1 SV=1	gi|460384249|ref|XP_004237825.1| PREDICTED: peroxidase 12-like [Solanum lycopersicum]	GO:0006979//response to oxidative stress;GO:0055114//obsolete oxidation-reduction process;	-	GO:0004601//peroxidase activity;GO:0020037//heme binding;	ko00940(Phenylpropanoid biosynthesis)	Peroxidase (AHRD V3.3 K4BTH6_SOLLC)
Solyc12g013700.2	536.908	74.6603	0.139056	-2.84626	0.0158141	0.715254	-	-	virNOG00934	S	sp|P24805|TSJT1_TOBAC Stem-specific protein TSJT1 OS=Nicotiana tabacum GN=TSJT1 PE=2 SV=1	gi|460412934|ref|XP_004251851.1| PREDICTED: stem-specific protein TSJT1 [Solanum lycopersicum]	-	-	-	-	stem-specific protein TSJT1-like (AHRD V3.3 A0A2I4H4H1_9ROSI)
Solyc10g080670.2	62.8339	21.0987	0.335786	-1.57439	0.0158575	0.715254	-	-	virNOG20661	S	-	gi|460407723|ref|XP_004249300.1| PREDICTED: uncharacterized protein LOC101267365 [Solanum lycopersicum]	-	-	-	-	Transmembrane protein, putative (AHRD V3.3 A2Q5V9_MEDTR)
Solyc06g071580.3	84.255	38.4496	0.456348	-1.13179	0.0158584	0.715254	-	-	NOG00664;virNOG05768	DR	sp|Q56Y74|MORC6_ARATH Protein MICRORCHIDIA 6 OS=Arabidopsis thaliana GN=MORC6 PE=1 SV=1	gi|460391773|ref|XP_004241493.1| PREDICTED: MORC family CW-type zinc finger protein 3-like isoform X1 [Solanum lycopersicum] gi|723708394|ref|XP_010322543.1| PREDICTED: MORC family CW-type zinc finger protein 3-like isoform X1 [Solanum lycopersicum] gi|723708400|ref|XP_010322544.1| PREDICTED: MORC family CW-type zinc finger protein 3-like isoform X1 [Solanum lycopersicum] gi|723708403|ref|XP_0103…	-	-	-	-	ATPase, histidine kinase, DNA gyrase B-, and HSP90-like domain containing protein, expressed (AHRD V3.3 Q33AG5_ORYSJ)
Solyc12g097080.2	83.3459	28.9733	0.347627	-1.52439	0.0159322	0.716093	GO:0005515	K00799	KOG0406;virNOG30014	O	sp|Q9FQA3|GST23_MAIZE Glutathione transferase GST 23 OS=Zea mays PE=2 SV=1	gi|460415326|ref|XP_004253010.1| PREDICTED: probable glutathione S-transferase [Solanum lycopersicum]	-	-	GO:0005515//protein binding;	ko00480(Glutathione metabolism)	Glutathione S-transferase (AHRD V3.3 A0A200PVK3_9MAGN)
Solyc08g013760.1	140.468	21.332	0.151865	-2.71914	0.0165303	0.720026	GO:0005515	-	-	-	-	-	-	-	GO:0005515//protein binding;	-	F-box family protein (AHRD V3.3 A0A2K3MZH1_TRIPR)
Solyc09g090080.1	298.487	48.5448	0.162636	-2.62028	0.0166723	0.72332	GO:0016021;GO:0022857;GO:0055085	K08176	NOG212389;KOG0252;virNOG02775	PG	sp|Q96303|PHT14_ARATH Inorganic phosphate transporter 1-4 OS=Arabidopsis thaliana GN=PHT1-4 PE=1 SV=1	gi|460404519|ref|XP_004247729.1| PREDICTED: inorganic phosphate transporter 1-4-like [Solanum lycopersicum]	GO:0055085//transmembrane transport;	GO:0016021//integral component of membrane;	GO:0022857//transmembrane transporter activity;	-	Phosphate transporter (AHRD V3.3 Q9AYT3_TOBAC)
Solyc12g005610.3	25.9487	6.89976	0.2659	-1.91105	0.0166788	0.72332	GO:0005515	-	-	-	-	-	-	-	GO:0005515//protein binding;	-	Leucine-rich receptor-like kinase family protein (AHRD V3.3 G7L9I8_MEDTR)
Solyc01g096620.4	173.543	62.914	0.362528	-1.46384	0.016779	0.725296	-	-	-	-	-	-	-	-	-	-	Cilia-and flagella-associated protein 20 (AHRD V3.3 A0A2G2YYL7_CAPAN)
Solyc01g079270.1	42.2964	16.079	0.38015	-1.39536	0.0168694	0.725759	-	-	virNOG25068	K	-	gi|723658599|ref|XP_010322328.1| PREDICTED: transcription factor UPBEAT1 [Solanum lycopersicum]	-	-	-	-	transcription factor UPBEAT1 (AHRD V3.3 XP_022860772.1)
Solyc12g045035.1	747.76	319.332	0.427052	-1.22752	0.017205	0.730342	GO:0006629	-	-	-	-	-	GO:0006629//lipid metabolic process;	-	-	-	Fatty acid desaturase (AHRD V3.3 A0A200QRI1_9MAGN)
Solyc08g150103.1	18.3226	1.62011	0.0884211	-3.49947	0.0175249	0.734567	-	K14488	-	-	-	-	-	-	-	ko04075(Plant hormone signal transduction)	Auxin-responsive protein SAUR32 (AHRD V3.3 A0A2G3BQ18_CAPCH)
Solyc08g078880.3	105.526	48.712	0.46161	-1.11525	0.0184022	0.756442	GO:0006812;GO:0015299;GO:0016021;GO:0055085	-	virNOG08701	P	sp|Q9SIT5|CHX15_ARATH Cation/H(+) antiporter 15 OS=Arabidopsis thaliana GN=CHX15 PE=2 SV=1	gi|460401270|ref|XP_004246149.1| PREDICTED: cation/H(+) antiporter 15 [Solanum lycopersicum]	GO:0006812//cation transport;GO:0055085//transmembrane transport;	GO:0016021//integral component of membrane;	GO:0015299//solute:proton antiporter activity;	-	Cation/H(+) antiporter 15 (AHRD V3.3 A0A2G3CC26_CAPCH)
Solyc07g052885.1	19.7197	4.55332	0.230902	-2.11465	0.0186695	0.759175	-	-	-	-	-	-	-	-	-	-	Unknown protein
Solyc01g104930.3	38.8164	14.5287	0.374292	-1.41777	0.0193166	0.775606	-	-	-	-	-	-	-	-	-	-	Vesicle-fusing ATPase (AHRD V3.3 A0A2G2ZB55_CAPAN)
Solyc11g010440.3	29.6826	9.90275	0.333621	-1.58372	0.0193461	0.775606	-	-	-	-	-	-	-	-	-	-	GLABRA2 expression modulator (AHRD V3.3 A0A2G3CDH1_CAPCH)
Solyc05g050360.3	302.962	94.2	0.31093	-1.68534	0.0208932	0.796547	GO:0005216;GO:0006811;GO:0016020;GO:0055085	K05391	virNOG15164;KOG0498	P	sp|O65717|CNGC1_ARATH Cyclic nucleotide-gated ion channel 1 OS=Arabidopsis thaliana GN=CNGC1 PE=1 SV=1	gi|460388857|ref|XP_004240080.1| PREDICTED: cyclic nucleotide-gated ion channel 1-like isoform X1 [Solanum lycopersicum]	GO:0006811//ion transport;GO:0055085//transmembrane transport;	GO:0016020//membrane;	GO:0005216//ion channel activity;	ko04626(Plant-pathogen interaction)	Cyclic nucleotide-gated ion channel 1 (AHRD V3.3 A0A2G2WSK7_CAPBA)
Solyc08g065320.3	364.113	176.583	0.484967	-1.04404	0.0209592	0.796547	-	K20726	virNOG07601	S	sp|F4ITL6|RTE1_ARATH Protein REVERSION-TO-ETHYLENE SENSITIVITY1 OS=Arabidopsis thaliana GN=RTE1 PE=1 SV=1	gi|350534758|ref|NP_001233902.1| green ripe-like 1 [Solanum lycopersicum] gi|723721840|ref|XP_010324960.1| PREDICTED: green ripe-like 1 isoform X1 [Solanum lycopersicum] gi|723721843|ref|XP_010324961.1| PREDICTED: green ripe-like 1 isoform X1 [Solanum lycopersicum] gi|723721846|ref|XP_010324962.1| PREDICTED: green ripe-like 1 isoform X1 [Solanum lycopersicum] gi|723721849|ref|XP_010324963.1| PRED…	-	-	-	ko04016(MAPK signaling pathway - plant)	green ripe-like 1
Solyc08g068540.4	26.6877	4.25496	0.159435	-2.64896	0.0209683	0.796547	GO:0003677	-	-	-	-	-	-	-	GO:0003677//DNA binding;	-	B3 domain-containing protein (AHRD V3.3 A0A1Q3CXA6_CEPFO)
Solyc12g008670.2	26.77	1.99105	0.0743761	-3.74902	0.0220044	0.820159	-	K09422	virNOG06373;virNOG34393	K	sp|Q9SJL7|RAX2_ARATH Transcription factor RAX2 OS=Arabidopsis thaliana GN=RAX2 PE=1 SV=1	gi|460412530|ref|XP_004251651.1| PREDICTED: transcription factor RAX1-like [Solanum lycopersicum]	-	-	-	-	blind-like4
Solyc08g023660.3	12.1483	0.319744	0.0263202	-5.24769	0.0222533	0.824705	GO:0006952	-	-	-	sp|P85524|KIRO_ACTDE Kirola OS=Actinidia deliciosa PE=1 SV=1	gi|460398654|ref|XP_004244869.1| PREDICTED: kirola-like [Solanum lycopersicum]	GO:0006952//defense response;	-	-	-	Kirola (AHRD V3.3 A0A1U8F0U0_CAPAN)
Solyc03g031450.3	106.713	49.2394	0.461421	-1.11585	0.0227059	0.833101	-	-	virNOG04635	K	sp|Q94JL3|BH112_ARATH Transcription factor bHLH112 OS=Arabidopsis thaliana GN=BHLH112 PE=1 SV=1	gi|460377606|ref|XP_004234582.1| PREDICTED: transcription factor bHLH112-like [Solanum lycopersicum]	-	-	-	-	Basic helix-loop-helix (BHLH) DNA-binding superfamily protein (AHRD V3.3 A0A2U1PMP2_ARTAN)
Solyc12g056360.1	46.1965	9.22049	0.199593	-2.32487	0.0227499	0.833101	-	-	virNOG01607	R	sp|P81370|TLP_ACTDE Thaumatin-like protein OS=Actinidia deliciosa GN=tlp PE=1 SV=2	gi|723751931|ref|XP_010314488.1| PREDICTED: thaumatin-like protein [Solanum lycopersicum]	-	-	-	-	Pathogenesis-related thaumatin family protein (AHRD V3.3 A0A2K3LJG6_TRIPR)
Solyc09g089740.3	42.1855	9.64414	0.228613	-2.12902	0.0229698	0.836931	GO:0016491;GO:0055114	-	COG3491;virNOG04549	QR	sp|P10967|ACCH3_SOLLC 1-aminocyclopropane-1-carboxylate oxidase homolog OS=Solanum lycopersicum GN=ACO3 PE=2 SV=1	gi|565376021|ref|XP_006354513.1| PREDICTED: 1-aminocyclopropane-1-carboxylate oxidase homolog [Solanum tuberosum]	GO:0055114//obsolete oxidation-reduction process;	-	GO:0016491//oxidoreductase activity;	-	2-oxoglutarate (2OG) and Fe(II)-dependent oxygenase superfamily protein (AHRD V3.3 A0A2U1NTU8_ARTAN)
Solyc01g106953.1	25.1308	7.52931	0.299604	-1.73887	0.0234074	0.840953	-	-	-	-	-	-	-	-	-	-	BnaAnng27030D protein (AHRD V3.3 A0A078DNT4_BRANA)
Solyc01g095450.4	27.9848	9.52036	0.340197	-1.55556	0.0235686	0.840953	GO:0016788	-	-	-	-	-	-	-	GO:0016788//hydrolase activity, acting on ester bonds;	-	GDSL esterase/lipase (AHRD V3.3 A0A2G2W6L9_CAPBA)
Solyc08g078760.1	29.6791	10.2879	0.346639	-1.52849	0.0238748	0.846454	-	-	virNOG05119	S	-	gi|460400473|ref|XP_004245759.1| PREDICTED: uncharacterized protein LOC101253408 [Solanum lycopersicum]	-	-	-	-	transmembrane protein (AHRD V3.3 AT4G17250.1)
Solyc09g005210.4	182.616	52.1428	0.285532	-1.80828	0.0240916	0.850619	-	-	-	-	-	-	-	-	-	-	Protein LURP-one-related 8 (AHRD V3.3 A0A2I0WR24_9ASPA)
Solyc11g006730.1	59.3343	6.63402	0.111808	-3.16091	0.0242492	0.850619	GO:0045735	-	virNOG17394	R	sp|Q652P9|GL93_ORYSJ Germin-like protein 9-3 OS=Oryza sativa subsp. japonica GN=Os09g0568700 PE=2 SV=1	gi|723740787|ref|XP_010312518.1| PREDICTED: putative germin-like protein 9-2 [Solanum lycopersicum]	-	-	GO:0045735//nutrient reservoir activity;	-	Germin (AHRD V3.3 A0A200QHW9_9MAGN)
Solyc09g015085.1	31.3325	10.3348	0.329843	-1.60015	0.0243155	0.850619	-	-	-	-	-	-	-	-	-	-	2-methyl-6-phytyl-1,4-hydroquinone methyltransferase, chloroplastic (AHRD V3.3 NP_001310397.1)
Solyc11g073180.2	49.959	21.5209	0.430771	-1.21501	0.0244385	0.851459	-	-	virNOG20166;virNOG17499	S	-	gi|723746634|ref|XP_010313554.1| PREDICTED: uncharacterized protein LOC104644788 [Solanum lycopersicum]	-	-	-	-	UPA23 (AHRD V3.3 C8YZB5_CAPAN)
Solyc03g121190.4	69.4417	23.9522	0.344926	-1.53564	0.0244501	0.851459	-	-	-	-	-	-	-	-	-	-	Unknown protein
Solyc03g115900.4	38.9314	15.8616	0.407426	-1.29539	0.0246572	0.85612	-	K08910	-	-	-	-	-	-	-	ko00196(Photosynthesis - antenna proteins)	Chlorophyll a-b binding protein, chloroplastic (AHRD V3.3 A0A1U8G3I4_CAPAN)
Solyc12g019220.1	17.6583	2.73444	0.154853	-2.69102	0.0258891	0.876056	GO:0004650;GO:0005975	K01184	virNOG01371	R	sp|P48979|PGLR_PRUPE Polygalacturonase OS=Prunus persica PE=2 SV=1	gi|970067559|ref|XP_015060877.1| PREDICTED: polygalacturonase-like [Solanum pennellii]	GO:0005975//carbohydrate metabolic process;	-	GO:0004650//polygalacturonase activity;	ko00040(Pentose and glucuronate interconversions)	Pectin lyase-like superfamily protein (AHRD V3.3 A0A1I9LP65_ARATH)
Solyc07g054760.1	202.122	1.92559	0.00952691	-6.71378	0.0260405	0.876056	-	-	virNOG24825	R	-	gi|460395478|ref|XP_004243310.1| PREDICTED: uncharacterized protein LOC101254813 [Solanum lycopersicum]	-	-	-	-	Wound-responsive family protein (AHRD V3.3 A0A2K3L288_TRIPR)
Solyc01g088400.4	141.762	44.4327	0.313432	-1.67377	0.0261771	0.878161	GO:0005506;GO:0008610;GO:0016491;GO:0055114	K15404	-	-	-	-	GO:0008610//lipid biosynthetic process;GO:0055114//obsolete oxidation-reduction process;	-	GO:0005506//iron ion binding;GO:0016491//oxidoreductase activity;	ko00073(Cutin, suberine and wax biosynthesis)	ECERIFERUM 1
Solyc03g094110.4	60.6657	25.5566	0.421269	-1.24719	0.02629	0.880137	-	-	-	-	-	-	-	-	-	-	Nucleotide-diphospho-sugar transferase (AHRD V3.3 A0A2U1NTH5_ARTAN)
Solyc01g007190.3	113.813	53.4075	0.469256	-1.09155	0.0263603	0.881356	-	-	virNOG24718;virNOG26320	S	-	gi|460365397|ref|XP_004228589.1| PREDICTED: uncharacterized protein LOC101262645 [Solanum lycopersicum]	-	-	-	-	Unknown protein
Solyc04g081250.1	56.7802	25.9396	0.456842	-1.13023	0.026505	0.881657	GO:0009733	K14488	virNOG24456;virNOG19935	S	sp|O65695|SAU50_ARATH Auxin-responsive protein SAUR50 OS=Arabidopsis thaliana GN=SAUR50 PE=1 SV=1	gi|460385296|ref|XP_004238340.1| PREDICTED: auxin-induced protein 10A5 [Solanum lycopersicum]	GO:0009733//response to auxin;	-	-	ko04075(Plant hormone signal transduction)	Small auxin up-regulated RNA51
Solyc03g013340.3	135.931	63.1411	0.464508	-1.10623	0.0265563	0.882233	GO:0015267;GO:0016020;GO:0055085	K09874	virNOG12510	G	sp|Q19KC1|NIP21_MAIZE Aquaporin NIP2-1 OS=Zea mays GN=NIP2-1 PE=2 SV=2	gi|565324117|ref|NP_001274283.1| Lsi-1 [Solanum lycopersicum] gi|560891769|dbj|BAO18643.1| nodulin26-like intrinsic protein 2;1 [Solanum lycopersicum]	GO:0055085//transmembrane transport;	GO:0016020//membrane;	GO:0015267//channel activity;	-	NOD26-like intrinsic protein 2.1
Solyc06g063260.4	77.6917	34.5215	0.44434	-1.17027	0.0281142	0.90411	GO:0004571;GO:0005509;GO:0016020	K01230	-	-	-	-	-	GO:0016020//membrane;	GO:0004571//mannosyl-oligosaccharide 1,2-alpha-mannosidase activity;GO:0005509//calcium ion binding;	ko04141(Protein processing in endoplasmic reticulum);ko00513(Various types of N-glycan biosynthesis);ko00510(N-Glycan biosynthesis)	alpha-1,2-Mannosidase (AHRD V3.3 A0A2G2WKP9_CAPBA)
Solyc07g045000.4	119.402	30.3918	0.254534	-1.97407	0.0281601	0.90411	-	-	-	-	-	-	-	-	-	-	Homeodomain-like protein (AHRD V3.3 A0A2U1N2T8_ARTAN)
Solyc01g150167.1	146.626	48.1663	0.328497	-1.60605	0.0281775	0.90411	GO:0003700;GO:0005634;GO:0006355	K09264	-	-	-	-	GO:0006355//regulation of transcription, DNA-templated;	GO:0005634//nucleus;	GO:0003700//DNA-binding transcription factor activity;	-	MADS-box transcription factor 27 (AHRD V3.3 A0A2G2Y3D7_CAPAN)
Solyc12g089190.1	10.3556	1.35156	0.130515	-2.93771	0.0281924	0.90411	-	-	virNOG23401;virNOG22977	K	sp|Q1A173|RADL6_ARATH Protein RADIALIS-like 6 OS=Arabidopsis thaliana GN=RL6 PE=2 SV=1	gi|460414885|ref|XP_004252792.1| PREDICTED: protein RADIALIS-like 3 [Solanum lycopersicum] gi|970067515|ref|XP_015060852.1| PREDICTED: protein RADIALIS-like 3 [Solanum pennellii]	-	-	-	-	Protein RADIALIS-like 6 (AHRD V3.3 A0A1U8ERP9_CAPAN)
Solyc08g062437.1	381.184	39.9746	0.10487	-3.25333	0.0284657	0.907729	-	K13993	-	-	-	-	-	-	-	ko04141(Protein processing in endoplasmic reticulum)	17.9 kDa class II heat shock protein (AHRD V3.3 A0A2G3CY92_CAPCH)
Solyc02g031790.3	42.6207	6.64828	0.155987	-2.6805	0.0290236	0.911734	GO:0004672;GO:0005524;GO:0006468	-	-	-	-	-	GO:0006468//protein phosphorylation;	-	GO:0004672//protein kinase activity;GO:0005524//ATP binding;	-	Receptor-like protein kinase (AHRD V3.3 A0A2R6Q6W2_ACTCH)
Solyc09g097760.3	525.259	0	0	-Inf	0.0295444	0.91802	-	-	NOG230868;virNOG38557	S	sp|P23137|GRP1_TOBAC Glycine-rich protein OS=Nicotiana tabacum GN=GRP PE=2 SV=1	gi|460405135|ref|XP_004248032.1| PREDICTED: glycine-rich protein DC9.1-like [Solanum lycopersicum]	-	-	-	-	Glycine-rich protein (AHRD V3.3 A0A2G2W2G9_CAPBA)
Solyc11g069850.3	16.2357	3.64961	0.224789	-2.15336	0.0299602	0.91802	-	-	-	-	-	-	-	-	-	-	Telomere repeat-binding protein 6 (AHRD V3.3 A0A2I0VYX5_9ASPA)
Solyc10g076210.2	406.48	154.99	0.381299	-1.39101	0.029963	0.91802	GO:0004601;GO:0006979;GO:0020037;GO:0055114	K00430	virNOG02484	R	sp|A7NY33|PER4_VITVI Peroxidase 4 OS=Vitis vinifera GN=GSVIVT00023967001 PE=1 SV=1	gi|460407224|ref|XP_004249054.1| PREDICTED: peroxidase 70-like [Solanum lycopersicum]	GO:0006979//response to oxidative stress;GO:0055114//obsolete oxidation-reduction process;	-	GO:0004601//peroxidase activity;GO:0020037//heme binding;	ko00940(Phenylpropanoid biosynthesis)	Peroxidase (AHRD V3.3 K4D1W3_SOLLC)
Solyc03g025380.3	54.56	25.3792	0.465161	-1.1042	0.0302693	0.921187	GO:0004601;GO:0006979;GO:0020037;GO:0055114	K00430	virNOG06856	R	sp|Q9FLC0|PER52_ARATH Peroxidase 52 OS=Arabidopsis thaliana GN=PER52 PE=2 SV=1	gi|460377276|ref|XP_004234419.1| PREDICTED: peroxidase P7-like [Solanum lycopersicum]	GO:0006979//response to oxidative stress;GO:0055114//obsolete oxidation-reduction process;	-	GO:0004601//peroxidase activity;GO:0020037//heme binding;	ko00940(Phenylpropanoid biosynthesis)	Peroxidase (AHRD V3.3 K4BF11_SOLLC)
Solyc04g039930.4	5.57043	0	0	-Inf	0.0302819	0.921187	GO:0010181;GO:0016491;GO:0055114	-	-	-	-	-	GO:0055114//obsolete oxidation-reduction process;	-	GO:0010181//FMN binding;GO:0016491//oxidoreductase activity;	-	12-oxophytodienoate reductase-like protein (AHRD V3.3 A0A2G3CPE0_CAPCH)
Solyc06g072210.1	493.469	0	0	-Inf	0.0304768	0.924911	GO:0004866	-	virNOG17981	R	sp|P13087|MIRA_SYNDU Miraculin OS=Synsepalum dulcificum PE=1 SV=3	gi|460393097|ref|XP_004242148.1| PREDICTED: miraculin-like [Solanum lycopersicum]	-	-	GO:0004866//endopeptidase inhibitor activity;	-	Miraculin (AHRD V3.3 A0A1U8H778_CAPAN)
Solyc02g076630.1	7.30323	0.319744	0.0437813	-4.51354	0.0306686	0.926259	-	-	virNOG22224;virNOG22284	S	sp|Q9SN47|DOGL1_ARATH Protein DOG1-like 1 OS=Arabidopsis thaliana GN=DOGL1 PE=2 SV=1	gi|723675144|ref|XP_010316820.1| PREDICTED: transcription factor HBP-1b(c38)-like [Solanum lycopersicum]	-	-	-	-	Unknown protein
Solyc03g113890.1	26.75	8.81541	0.329549	-1.60144	0.0312924	0.934418	-	-	virNOG22884;virNOG36475	K	sp|Q9C9H1|GIS3_ARATH Zinc finger protein GIS3 OS=Arabidopsis thaliana GN=GIS3 PE=1 SV=1	gi|970013017|ref|XP_015067463.1| PREDICTED: uncharacterized protein LOC107012202 isoform X1 [Solanum pennellii]	-	-	-	-	Zinc finger protein GIS (AHRD V3.3 A0A2G3AWD2_CAPCH)
Solyc07g064820.1	64.0757	30.788	0.480495	-1.05741	0.0314702	0.937156	GO:0004672;GO:0005524;GO:0006468	K20716	virNOG09909	T	sp|O80888|M3K17_ARATH Mitogen-activated protein kinase kinase kinase 17 OS=Arabidopsis thaliana GN=MAPKKK17 PE=1 SV=1	gi|460397582|ref|XP_004244346.1| PREDICTED: mitogen-activated protein kinase kinase kinase 2-like [Solanum lycopersicum]	GO:0006468//protein phosphorylation;	-	GO:0004672//protein kinase activity;GO:0005524//ATP binding;	ko04016(MAPK signaling pathway - plant)	MAP kinase kinase kinase 59
Solyc07g009405.1	240.59	0	0	-Inf	0.0317329	0.937205	-	-	-	-	-	-	-	-	-	-	Unknown protein
Solyc09g009420.1	35.3371	14.0343	0.397155	-1.33222	0.032108	0.94146	-	-	virNOG25695	S	sp|Q9LXJ1|BIC1_ARATH Protein BIC1 OS=Arabidopsis thaliana GN=BIC1 PE=1 SV=1	gi|460402088|ref|XP_004246546.1| PREDICTED: uncharacterized protein LOC101264052 [Solanum lycopersicum]	-	-	-	-	hypothetical protein (AHRD V3.3 AT3G52740.1)
Solyc01g100980.4	45.354	20.0058	0.441103	-1.18081	0.0323689	0.944367	GO:0004650;GO:0005975	-	-	-	-	-	GO:0005975//carbohydrate metabolic process;	-	GO:0004650//polygalacturonase activity;	-	Pectin lyase-like superfamily protein (AHRD V3.3 A0A2U1LK87_ARTAN)
Solyc03g116480.1	36.5298	14.5727	0.398927	-1.3258	0.0329343	0.946552	GO:0005515	-	virNOG16384	R	sp|Q9FGY4|FB341_ARATH F-box protein At5g49610 OS=Arabidopsis thaliana GN=At5g49610 PE=1 SV=1	gi|460380551|ref|XP_004236019.1| PREDICTED: F-box protein At5g49610-like [Solanum lycopersicum]	-	-	GO:0005515//protein binding;	-	F-box/kelch-repeat protein At5g15710-like (AHRD V3.3 A0A2I4DW48_9ROSI)
Solyc08g076970.3	28.8362	0.687878	0.0238547	-5.38959	0.0334872	0.952863	GO:0016787	K01438	virNOG05177;COG0624	E	sp|Q9C5C4|ARGE_ARATH Acetylornithine deacetylase OS=Arabidopsis thaliana GN=At4g17830 PE=2 SV=1	gi|460400744|ref|XP_004245892.1| PREDICTED: acetylornithine deacetylase [Solanum lycopersicum]	-	-	GO:0016787//hydrolase activity;	ko00220(Arginine biosynthesis)	Acetylornithine deacetylase (AHRD V3.3 A0A2G2XLB1_CAPBA)
Solyc01g095530.2	64.6526	25.7996	0.39905	-1.32536	0.0339896	0.954655	-	-	virNOG24950	S	-	gi|723661436|ref|XP_010326840.1| PREDICTED: uncharacterized protein LOC104649409 [Solanum lycopersicum]	-	-	-	-	hypothetical protein (AHRD V3.3 AT5G41761.1)
Solyc12g005310.2	68.3391	34.1149	0.4992	-1.00231	0.0340646	0.954655	-	K14487	virNOG09400	R	sp|Q9LSQ4|GH36_ARATH Indole-3-acetic acid-amido synthetase GH3.6 OS=Arabidopsis thaliana GN=GH3.6 PE=1 SV=1	gi|460412190|ref|XP_004251485.1| PREDICTED: indole-3-acetic acid-amido synthetase GH3.6 [Solanum lycopersicum]	-	-	-	ko04075(Plant hormone signal transduction)	Auxin-responsive GH3 family protein (AHRD V3.3 A0A2U1LNK3_ARTAN)
Solyc03g082620.4	618.44	297.137	0.480462	-1.0575	0.0344933	0.956009	GO:0055085	-	-	-	-	-	GO:0055085//transmembrane transport;	-	-	-	Metal-nicotianamine transporter YSL1 (AHRD V3.3 A0A2G2X7E8_CAPBA)
Solyc04g007320.3	91.9301	44.2455	0.481295	-1.05501	0.0348501	0.959079	GO:0043531	-	-	-	-	-	-	-	GO:0043531//ADP binding;	-	Disease resistance protein (TIR-NBS-LRR class) (AHRD V3.3 A0A2U1PW75_ARTAN)
Solyc07g054120.2	41.2001	17.8883	0.434182	-1.20363	0.0351071	0.961514	GO:0005515	-	COG4886;virNOG12729	SR	sp|O82318|Y2579_ARATH Probably inactive leucine-rich repeat receptor-like protein kinase At2g25790 OS=Arabidopsis thaliana GN=At2g25790 PE=2 SV=1	gi|723715223|ref|XP_010323736.1| PREDICTED: probable leucine-rich repeat receptor-like protein kinase At1g35710 [Solanum lycopersicum]	-	-	GO:0005515//protein binding;	-	leucine-rich repeat receptor protein kinase EMS1-like (AHRD V3.3 A0A1U8F870_CAPAN)
Solyc08g008080.1	46.1884	16.5026	0.35729	-1.48483	0.0353698	0.963737	-	-	virNOG20086;NOG31818	O	sp|Q9SUS5|RHA1B_ARATH E3 ubiquitin-protein ligase RHA1B OS=Arabidopsis thaliana GN=RHA1B PE=2 SV=1	gi|460398132|ref|XP_004244617.1| PREDICTED: E3 ubiquitin-protein ligase RHA1B-like [Solanum lycopersicum]	-	-	-	-	RING/U-box superfamily protein (AHRD V3.3 Q3EAE6_ARATH)
Solyc06g065850.3	158.709	57.029	0.35933	-1.47662	0.036147	0.968124	-	K07192	-	-	-	-	-	-	-	-	Flotillin-like protein (AHRD V3.3 A0A2K3NEM2_TRIPR)
Solyc05g053030.1	14.096	3.05419	0.21667	-2.20643	0.0363957	0.970548	-	K13508	virNOG12108;virNOG05685	OI	sp|Q9CAY3|GPAT5_ARATH Glycerol-3-phosphate acyltransferase 5 OS=Arabidopsis thaliana GN=GPAT5 PE=1 SV=1	gi|723701898|ref|XP_010321432.1| PREDICTED: glycerol-3-phosphate acyltransferase 5-like [Solanum lycopersicum]	-	-	-	ko00564(Glycerophospholipid metabolism);ko00561(Glycerolipid metabolism)	Glycerol-3-phosphate acyltransferase 5 (AHRD V3.3 A0A2G2XA33_CAPBA)
Solyc07g053420.4	147.861	51.3467	0.347262	-1.5259	0.0364623	0.970548	-	K19038	-	-	-	-	-	-	-	-	RING/U-box superfamily protein (AHRD V3.3 A0A2U1LDD8_ARTAN)
Solyc11g039550.1	5.29267	0	0	-Inf	0.0371699	0.977366	-	-	-	-	-	-	-	-	-	-	Unknown protein
Solyc03g096250.3	8.97626	0.983428	0.109559	-3.19022	0.0375367	0.982179	-	-	virNOG19758	R	sp|P59234|YIPL_SOLTU Protein yippee-like OS=Solanum tuberosum PE=2 SV=1	gi|460379000|ref|XP_004235253.1| PREDICTED: protein yippee-like [Solanum lycopersicum]	-	-	-	-	Protein yippee-like (AHRD V3.3 A0A1U8GAE4_CAPAN)
Solyc10g084100.2	31.8785	12.1865	0.38228	-1.3873	0.0381361	0.98581	-	-	virNOG10691	R	sp|Q8S8P6|PP180_ARATH Pentatricopeptide repeat-containing protein At2g32630 OS=Arabidopsis thaliana GN=At2g32630 PE=3 SV=1	gi|723740223|ref|XP_010312424.1| PREDICTED: pentatricopeptide repeat-containing protein At5g55840 [Solanum lycopersicum]	-	-	-	-	RING/U-box superfamily protein (AHRD V3.3 A0A2U1PM96_ARTAN)
Solyc06g065410.3	18.9143	5.26971	0.27861	-1.84368	0.0385787	0.989709	GO:0003677;GO:0006355	-	virNOG00469	S	sp|Q9C8W9|NAC30_ARATH NAC domain-containing protein 30 OS=Arabidopsis thaliana GN=NAC030 PE=1 SV=1	gi|460393268|ref|XP_004242232.1| PREDICTED: NAC domain-containing protein 7-like [Solanum lycopersicum]	GO:0006355//regulation of transcription, DNA-templated;	-	GO:0003677//DNA binding;	-	NAC domain-containing protein 37 (AHRD V3.3 A0A2G2WKG4_CAPBA)
Solyc12g035180.1	18.2451	4.96703	0.27224	-1.87705	0.0385918	0.989709	-	-	-	-	-	-	-	-	-	-	Unknown protein
Solyc07g053300.1	12.3431	2.29092	0.185604	-2.4297	0.0392609	0.999959	GO:0016020	-	virNOG04202	Q	sp|Q9MAH4|AB10G_ARATH ABC transporter G family member 10 OS=Arabidopsis thaliana GN=ABCG10 PE=3 SV=1	gi|460396521|ref|XP_004243821.1| PREDICTED: ABC transporter G family member 10-like [Solanum lycopersicum]	-	GO:0016020//membrane;	-	-	ABC transporter G family member 10 (AHRD V3.3 A0A1U8FBD6_CAPAN)
Solyc12g056160.2	23.7249	7.85467	0.331073	-1.59478	0.0394572	1	GO:0006812;GO:0015299;GO:0016021;GO:0055085	-	virNOG05203	P	sp|Q9FFR9|CHX18_ARATH Cation/H(+) antiporter 18 OS=Arabidopsis thaliana GN=CHX18 PE=2 SV=1	gi|460414431|ref|XP_004252574.1| PREDICTED: cation/H(+) antiporter 18 [Solanum lycopersicum] gi|723751984|ref|XP_010314495.1| PREDICTED: cation/H(+) antiporter 18 [Solanum lycopersicum]	GO:0006812//cation transport;GO:0055085//transmembrane transport;	GO:0016021//integral component of membrane;	GO:0015299//solute:proton antiporter activity;	-	Cation/H(+) antiporter 17 (AHRD V3.3 A0A2G2Y8P8_CAPAN)
Solyc08g015820.1	28.0232	10.2424	0.365496	-1.45207	0.0402185	1	-	-	-	-	-	-	-	-	-	-	Unknown protein
Solyc02g071130.4	103.87	40.3315	0.388289	-1.3648	0.0411502	1	GO:0003700;GO:0006355;GO:0043565	-	-	-	-	-	GO:0006355//regulation of transcription, DNA-templated;	-	GO:0003700//DNA-binding transcription factor activity;GO:0043565//sequence-specific DNA binding;	-	WRKY transcription factor 71
Solyc06g071700.1	21.4834	6.92676	0.322424	-1.63297	0.0416769	1	GO:0005507;GO:0008131;GO:0009308;GO:0048038;GO:0055114	K00276	virNOG01461	Q	sp|Q07121|AMO1_ARTS1 Primary amine oxidase OS=Arthrobacter sp. (strain P1) GN=maoI PE=1 SV=1	gi|723708360|ref|XP_010322539.1| PREDICTED: copper amine oxidase 1-like [Solanum lycopersicum]	GO:0009308//amine metabolic process;GO:0055114//obsolete oxidation-reduction process;	-	GO:0005507//copper ion binding;GO:0008131//primary amine oxidase activity;GO:0048038//quinone binding;	ko00960(Tropane, piperidine and pyridine alkaloid biosynthesis);ko00950(Isoquinoline alkaloid biosynthesis);ko00410(beta-Alanine metabolism);ko00360(Phenylalanine metabolism);ko00350(Tyrosine metabolism);ko00260(Glycine, serine and threonine metabolism)	Amine oxidase (AHRD V3.3 A0A2G2V6E4_CAPBA)
Solyc09g005090.1	103.771	27.5694	0.265675	-1.91227	0.0417626	1	GO:0005515	-	-	-	-	-	-	-	GO:0005515//protein binding;	-	verticillium wilt disease resistance
Solyc03g006490.3	590.496	180.213	0.305189	-1.71223	0.0424302	1	-	-	virNOG00934	S	sp|P24805|TSJT1_TOBAC Stem-specific protein TSJT1 OS=Nicotiana tabacum GN=TSJT1 PE=2 SV=1	gi|807066298|ref|NP_001234039.2| expressed predominantly in leaves [Solanum lycopersicum]	-	-	-	-	Stem-specific protein TSJT1 (AHRD V3.3 A0A2G2WW08_CAPBA)
Solyc12g013640.2	17.3378	4.60603	0.265664	-1.91232	0.0426249	1	GO:0016020	K05681	NOG06685;virNOG00386	QR	sp|Q9SZR9|AB9G_ARATH ABC transporter G family member 9 OS=Arabidopsis thaliana GN=ABCG9 PE=3 SV=2	gi|460413459|ref|XP_004252106.1| PREDICTED: ABC transporter G family member 9-like [Solanum lycopersicum]	-	GO:0016020//membrane;	-	ko02010(ABC transporters)	ABC transporter G family member 21 (AHRD V3.3 A0A2G3BLU7_CAPCH)
Solyc09g084450.3	15.7672	4.02055	0.254994	-1.97146	0.0429853	1	GO:0004867;GO:0009611	-	virNOG27318	R	sp|P16231|ICI1_SOLPE Wound-induced proteinase inhibitor 1 OS=Solanum peruvianum PE=3 SV=1	gi|460404371|ref|XP_004247656.1| PREDICTED: wound-induced proteinase inhibitor 1 [Solanum lycopersicum]	GO:0009611//response to wounding;	-	GO:0004867//serine-type endopeptidase inhibitor activity;	-	Protease inhibitor I (AHRD V3.3 Q07459_SOLTU)
Solyc06g073080.4	14.6994	1.00762	0.0685483	-3.86674	0.043584	1	GO:0016491;GO:0055114	K24028	-	-	-	-	GO:0055114//obsolete oxidation-reduction process;	-	GO:0016491//oxidoreductase activity;	-	2-oxoglutarate (2OG) and Fe(II)-dependent oxygenase superfamily protein (AHRD V3.3 A0A2U1QGX7_ARTAN)
Solyc10g085140.2	22.6068	7.59476	0.33595	-1.57368	0.0438289	1	GO:0016765	-	-	-	-	-	-	-	GO:0016765//transferase activity, transferring alkyl or aryl (other than methyl) groups;	-	Alkyl transferase (AHRD V3.3 K7X479_SOLLC)
Solyc12g017480.3	52.4403	12.8645	0.245317	-2.02728	0.0444645	1	GO:0005515	-	-	-	-	-	-	-	GO:0005515//protein binding;	-	Plant intracellular Ras-group-related LRR protein (AHRD V3.3 A0A2R6R402_ACTCH)
Solyc02g069200.3	219.193	0	0	-Inf	0.0444937	1	GO:0016020;GO:0030001;GO:0046873;GO:0055085	K14709	virNOG11346	P	sp|Q38856|IRT1_ARATH Fe(2+) transport protein 1 OS=Arabidopsis thaliana GN=IRT1 PE=1 SV=2	gi|350536469|ref|NP_001234248.1| iron-regulated transporter 1 precursor [Solanum lycopersicum] gi|4836771|gb|AAD30548.1|AF136579_1 iron-regulated transporter 1 [Solanum lycopersicum] gi|9716481|gb|AAF97509.1|AF246266_1 iron-regulated transporter 1 [Solanum lycopersicum]	GO:0030001//metal ion transport;GO:0055085//transmembrane transport;	GO:0016020//membrane;	GO:0046873//metal ion transmembrane transporter activity;	-	iron-regulated transporter 1
Solyc07g044900.1	230.117	0	0	-Inf	0.044524	1	-	-	-	-	-	-	-	-	-	-	Unknown protein
Solyc02g083310.3	915.197	425.325	0.464737	-1.10551	0.0445293	1	GO:0004518	K08999	virNOG04159	S	sp|Q6YZM6|BBD2_ORYSJ Bifunctional nuclease 2 OS=Oryza sativa subsp. japonica GN=BBD2 PE=2 SV=1	gi|460373448|ref|XP_004232531.1| PREDICTED: bifunctional nuclease 2 [Solanum lycopersicum]	-	-	GO:0004518//nuclease activity;	-	Bifunctional nuclease 2 (AHRD V3.3 A0A1J3GME9_NOCCA)
Solyc01g100760.2	201.61	92.8707	0.460645	-1.11827	0.0447801	1	-	-	virNOG20715	S	-	gi|460368947|ref|XP_004230326.1| PREDICTED: uncharacterized protein LOC101254945 [Solanum lycopersicum]	-	-	-	-	DUF538 domain-containing protein (AHRD V3.3 A0A1Q3CLQ5_CEPFO)
Solyc08g082950.4	215.727	87.574	0.405948	-1.30063	0.0451777	1	GO:0015743	-	-	-	-	-	GO:0015743//malate transport;	-	-	-	Aluminum activated malate transporter family protein (AHRD V3.3 A0A2U1LM75_ARTAN)
Solyc03g005770.3	45.1006	10.1471	0.224988	-2.15208	0.045494	1	-	K08912	virNOG02411	O	sp|P07369|CB2G_SOLLC Chlorophyll a-b binding protein 3C, chloroplastic OS=Solanum lycopersicum GN=CAB3C PE=3 SV=1	gi|970017362|ref|XP_015069811.1| PREDICTED: chlorophyll a-b binding protein 3B, chloroplastic [Solanum pennellii]	-	-	-	ko00196(Photosynthesis - antenna proteins)	Chlorophyll a-b binding protein, chloroplastic (AHRD V3.3 A0A2G2W7Q4_CAPBA)
Solyc04g064880.4	4025.14	1632.81	0.405652	-1.30168	0.0456722	1	-	-	-	-	-	-	-	-	-	-	Pathogen-related protein (AHRD V3.3 A0A1U8GE43_CAPAN)
Solyc02g032170.4	44.3928	20.2998	0.457277	-1.12886	0.0463553	1	-	-	-	-	-	-	-	-	-	-	Unknown protein
Solyc12g096350.2	50.0911	24.3305	0.485725	-1.04179	0.0463967	1	GO:0003700;GO:0006355;GO:0043565	-	virNOG02752	K	sp|Q9SV15|WRK11_ARATH Probable WRKY transcription factor 11 OS=Arabidopsis thaliana GN=WRKY11 PE=2 SV=2	gi|1007386554|ref|NP_001308135.1| probable WRKY transcription factor 17 [Solanum lycopersicum]	GO:0006355//regulation of transcription, DNA-templated;	-	GO:0003700//DNA-binding transcription factor activity;GO:0043565//sequence-specific DNA binding;	-	WRKY transcription factor 10
Solyc09g065660.4	134.546	20.9164	0.15546	-2.68539	0.0465022	1	GO:0003700;GO:0005634;GO:0006355;GO:0043565	K09419	-	-	-	-	GO:0006355//regulation of transcription, DNA-templated;	GO:0005634//nucleus;	GO:0003700//DNA-binding transcription factor activity;GO:0043565//sequence-specific DNA binding;	-	Heat shock transcription factor (AHRD V3.3 A0A1Y1I763_KLENI)
Solyc02g084420.3	6.46703	0.319744	0.0494422	-4.33811	0.0471522	1	GO:0008270	-	virNOG19016;virNOG02706	S	sp|C0SVM5|BBX19_ARATH B-box zinc finger protein 19 OS=Arabidopsis thaliana GN=BBX19 PE=1 SV=1	gi|970010568|ref|XP_015066178.1| PREDICTED: B-box zinc finger protein 19-like [Solanum pennellii]	-	-	GO:0008270//zinc ion binding;	-	Zinc finger, B-box (AHRD V3.3 A0A2U1LAI4_ARTAN)
Solyc02g089140.3	641.604	0.653745	0.00101892	-9.93874	0.0476961	1	-	-	-	-	-	-	-	-	-	-	B12D protein (AHRD V3.3 A0A2U1M961_ARTAN)
Solyc04g016430.3	47.5492	21.724	0.456873	-1.13013	0.0481332	1	GO:0009690;GO:0019139;GO:0050660;GO:0055114	K00279	NOG119822;virNOG02207	SC	sp|O22213|CKX1_ARATH Cytokinin dehydrogenase 1 OS=Arabidopsis thaliana GN=CKX1 PE=1 SV=1	gi|384081606|ref|NP_001244907.1| cytokinin oxidase/dehydrogenase-like 5 precursor [Solanum lycopersicum] gi|383212274|dbj|BAM09007.1| cytokinin oxidase/dehydrogenase-like [Solanum lycopersicum]	GO:0009690//cytokinin metabolic process;GO:0055114//obsolete oxidation-reduction process;	-	GO:0019139//cytokinin dehydrogenase activity;GO:0050660//flavin adenine dinucleotide binding;	ko00908(Zeatin biosynthesis)	Cytokinin dehydrogenase 1 (AHRD V3.3 A0A2G2ZF38_CAPAN)
Solyc10g150113.1	8.61146	1.03182	0.119819	-3.06107	0.0484072	1	-	K10579	-	-	-	-	-	-	-	ko04120(Ubiquitin mediated proteolysis)	Ubiquitin-conjugating enzyme (AHRD V3.3 A0A1Y1HS89_KLENI)
Solyc02g083030.1	7.55554	0.670811	0.0887841	-3.49356	0.0493999	1	-	-	virNOG06008	S	-	gi|723672934|ref|XP_010316455.1| PREDICTED: uncharacterized protein LOC104645770 [Solanum lycopersicum]	-	-	-	-	DUF241 domain-containing protein (AHRD V3.3 A0A1Q3CEB1_CEPFO)
Solyc03g019690.1	679.653	252.239	0.371129	-1.43001	0.0494687	1	GO:0004866	-	-	-	sp|Q41433|SPI6_SOLTU Probable serine protease inhibitor 6 OS=Solanum tuberosum PE=2 SV=1	gi|460377050|ref|XP_004234308.1| PREDICTED: serine protease inhibitor 5-like [Solanum lycopersicum]	-	-	GO:0004866//endopeptidase inhibitor activity;	-	Serine protease inhibitor 1 (AHRD V3.3 A0A2G2XWH1_CAPAN)
Solyc12g010020.3	13.9277	0	0	-Inf	0.0495412	1	GO:0004177;GO:0005622;GO:0006508	K01255	-	-	-	-	GO:0006508//proteolysis;	GO:0005622//intracellular anatomical structure;	GO:0004177//aminopeptidase activity;	ko00480(Glutathione metabolism)	Leucine aminopeptidase A1
Solyc03g115650.4	2512.9	1147.52	0.456653	-1.13083	0.0498131	1	GO:0003723;GO:0003746;GO:0006452;GO:0043022;GO:0045901;GO:0045905	K03263	-	-	-	-	GO:0006452//translational frameshifting;GO:0045901//positive regulation of translational elongation;GO:0045905//positive regulation of translational termination;	-	GO:0003723//RNA binding;GO:0003746//translation elongation factor activity;GO:0043022//ribosome binding;	-	eukaryotic translation initiation factor 5A-1
